# Supplementary material for: Enantioselective synthesis of monofluorinated allylic compounds: Pd-catalyzed asymmetric allylations of dimethyl 2-fluoromalonate using new N-sulfinyl-based ligands
Source: Royal Society of Chemistry journal article supplement (doi:10.1039/c5ob01434d), 2015-01-01
Supplement: c5ob01434d1.pdf [file c5ob01434d1.pdf]

## SI

**Enantioselective synthesis of monofluorinated allylic compounds:  
Pd-catalyzed asymmetric allylations of dimethyl 2-fluoromalonate  
using new *N*-sulfinyl-based ligands**

Ning Gao, Xiao-Ming Zhao\*, Cheng-Si Cai and Jue-Wang Cai

Shanghai Key Lab of Chemical Assessment and Sustainability, Department of Chemistry, Tongji  
University, 1239 Siping Road, 200092 Shanghai, P.R. China.

E-mail: xmzhao08@mail.tongji.edu.cn

<sup>1</sup>H, <sup>19</sup>F, <sup>13</sup>C, <sup>31</sup>P NMR Data

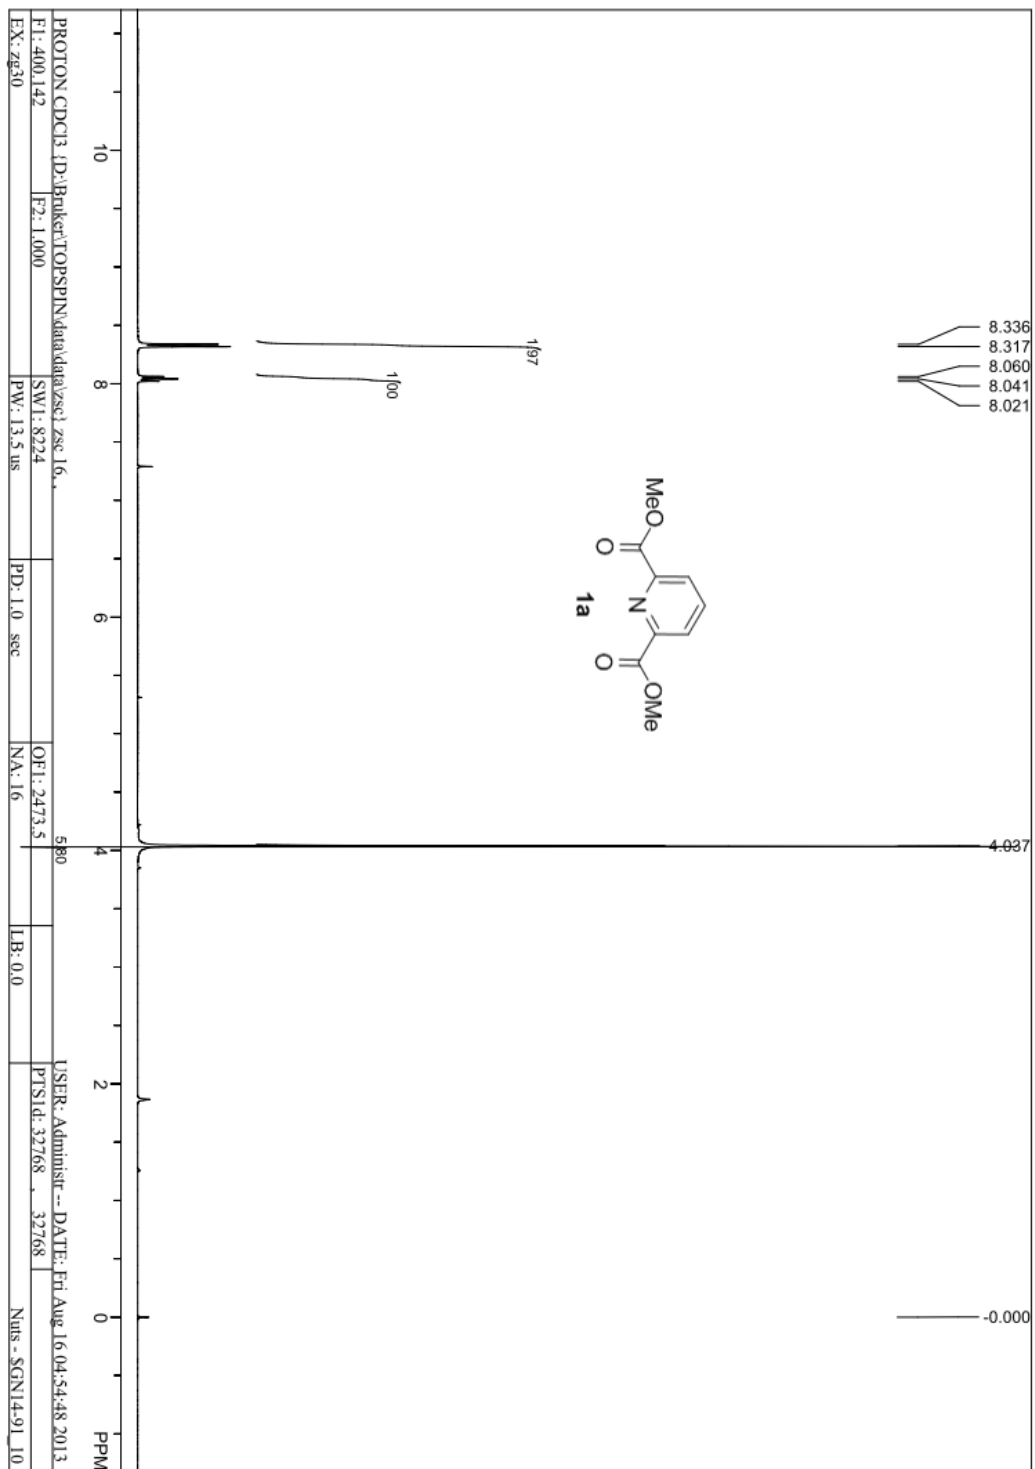

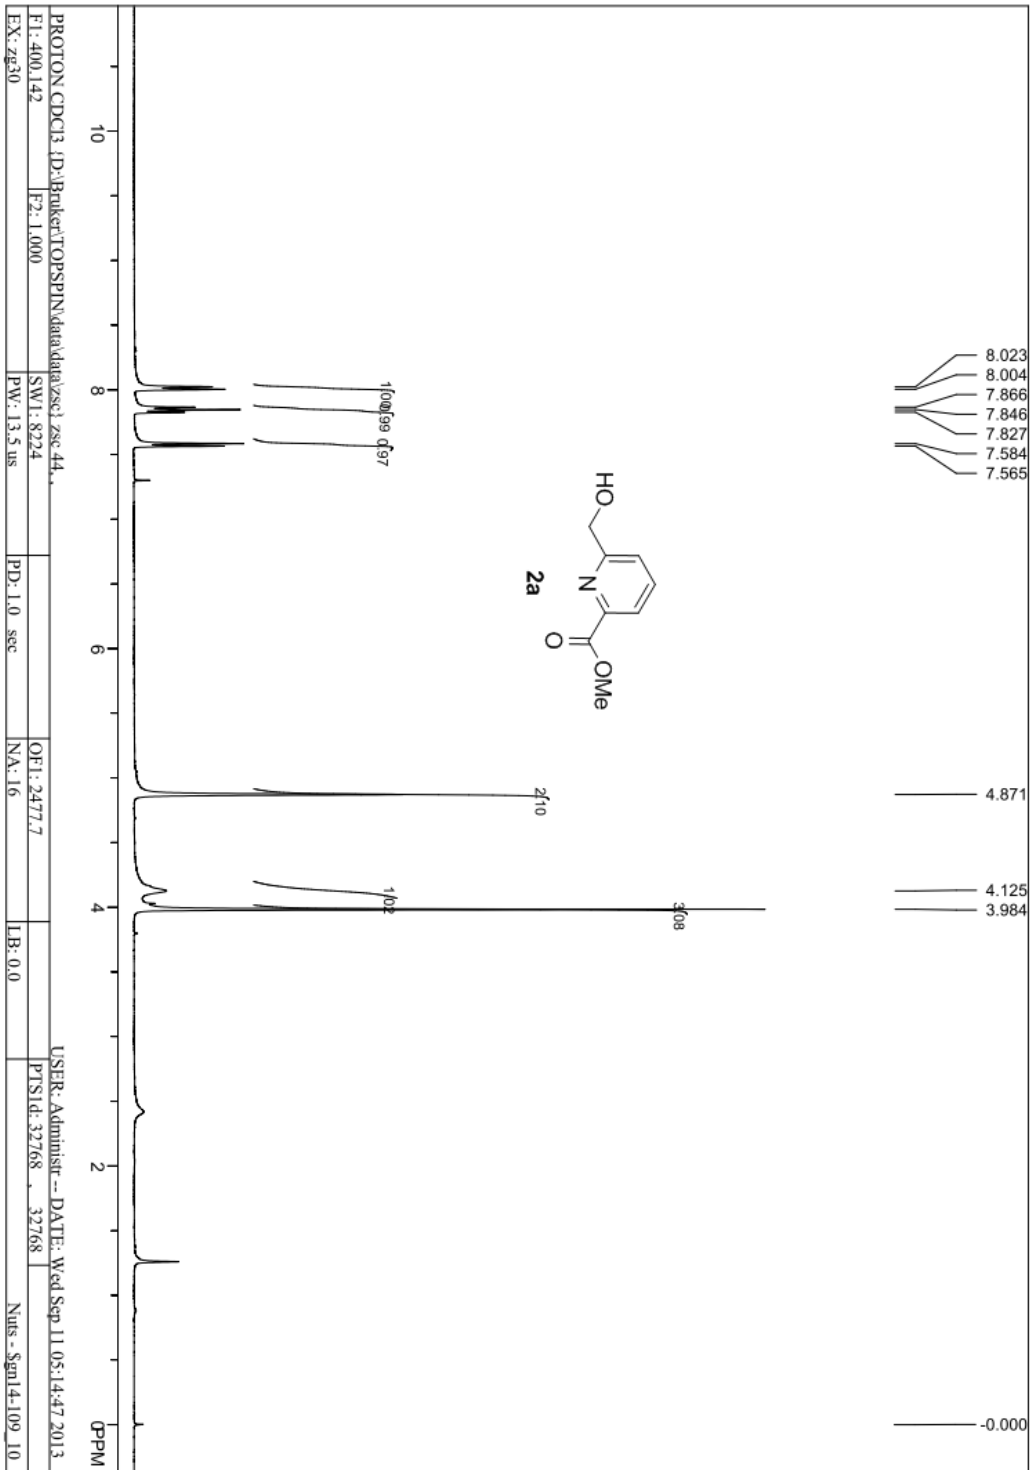

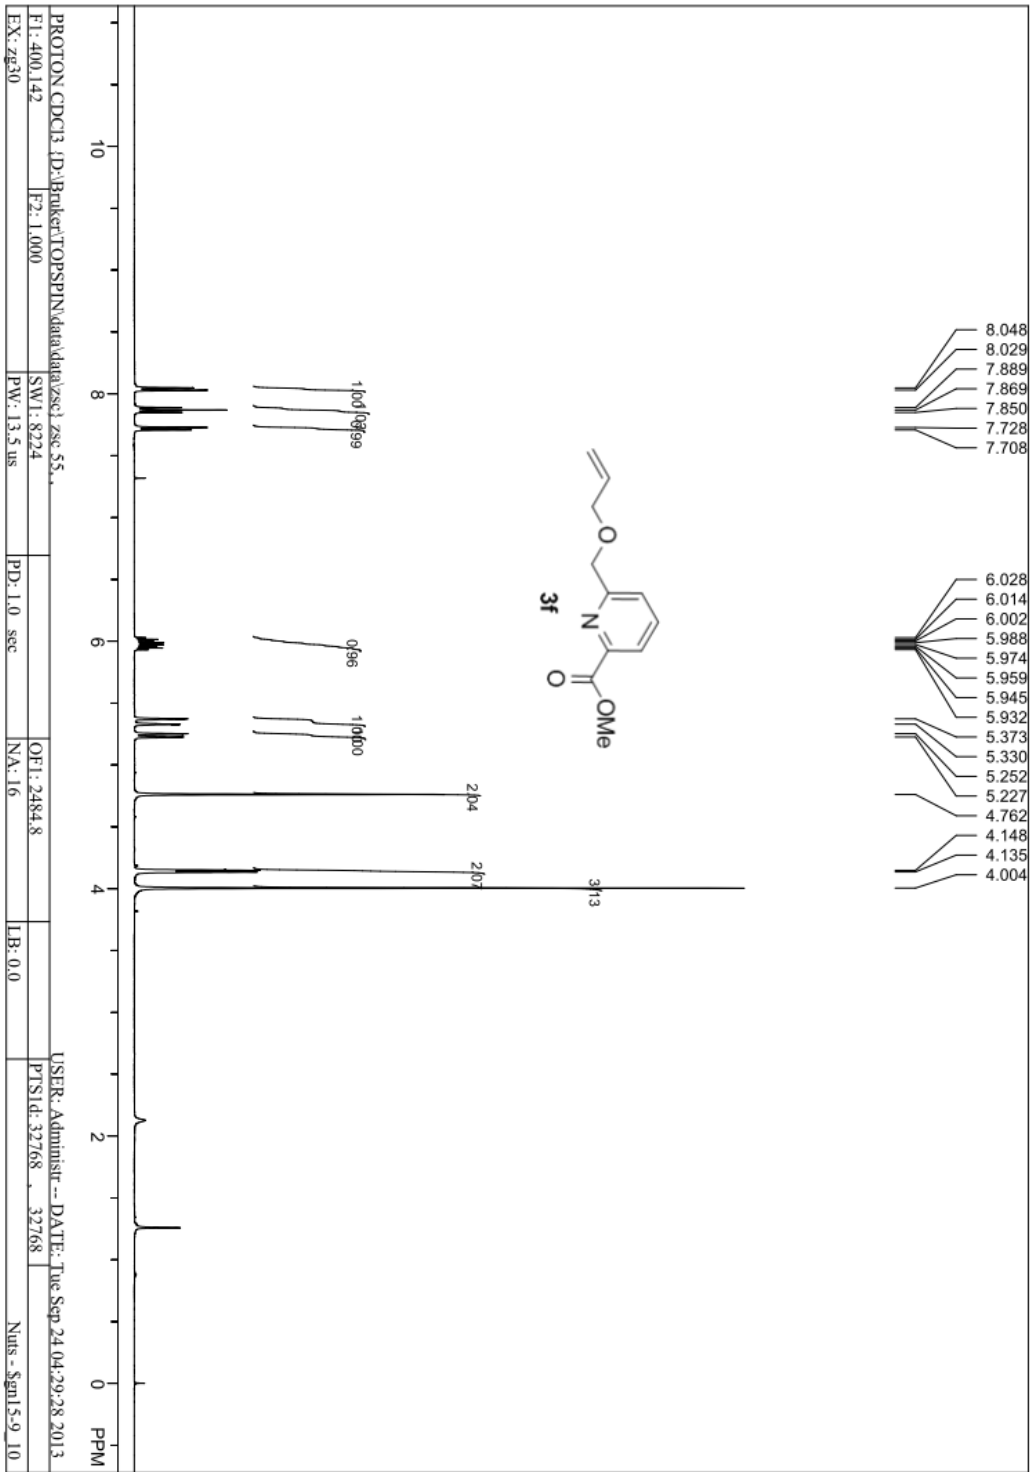

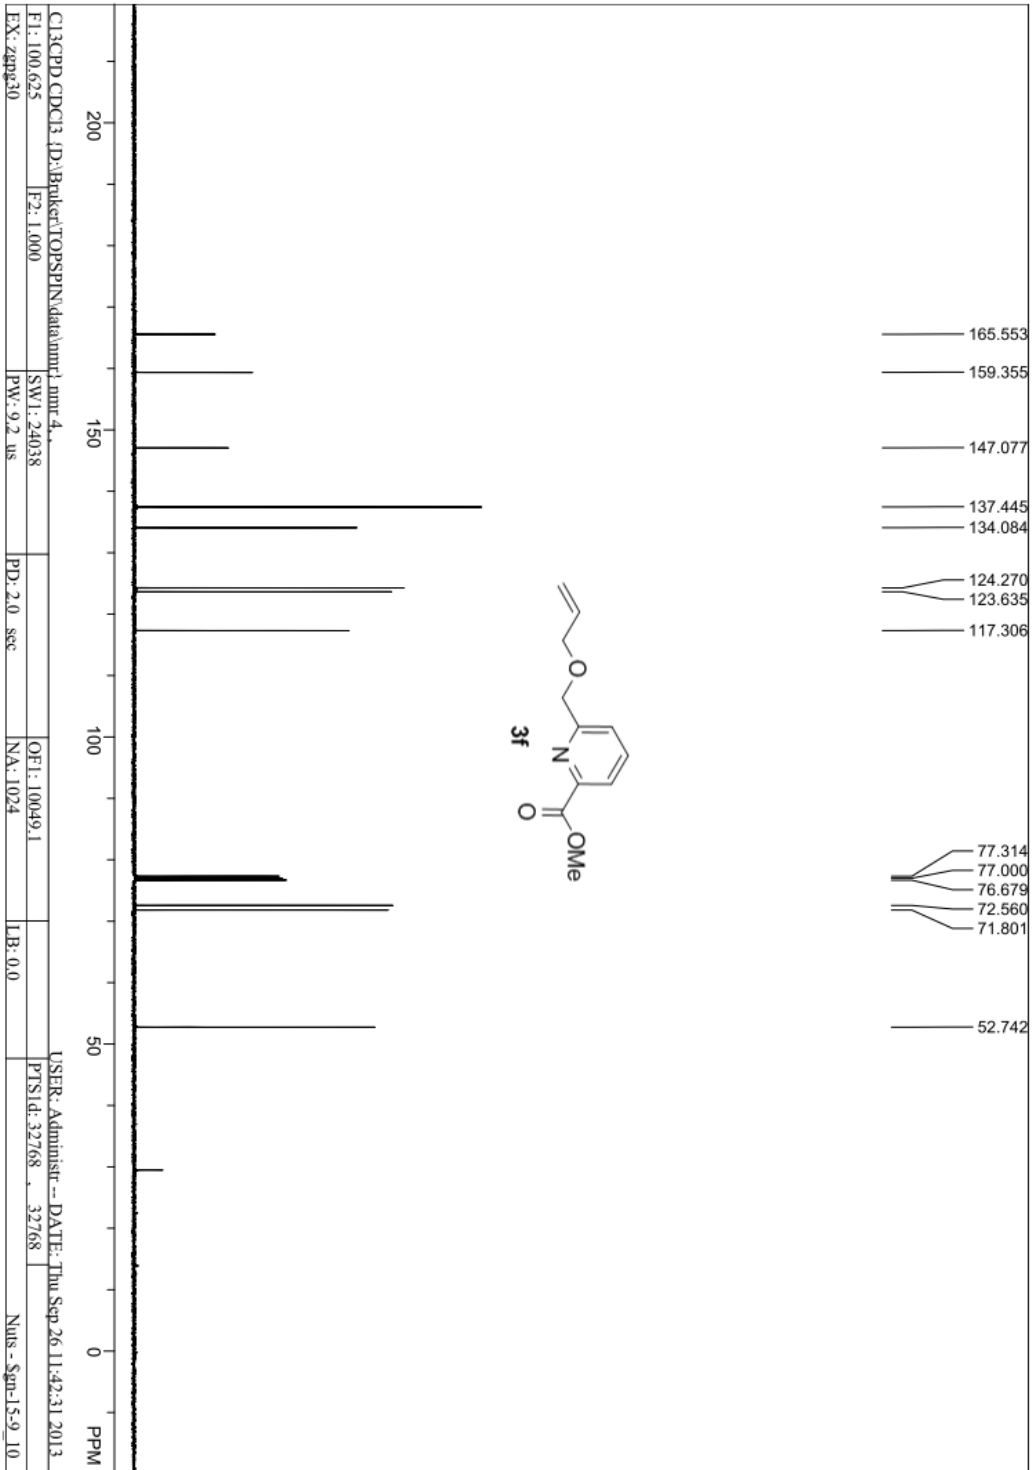

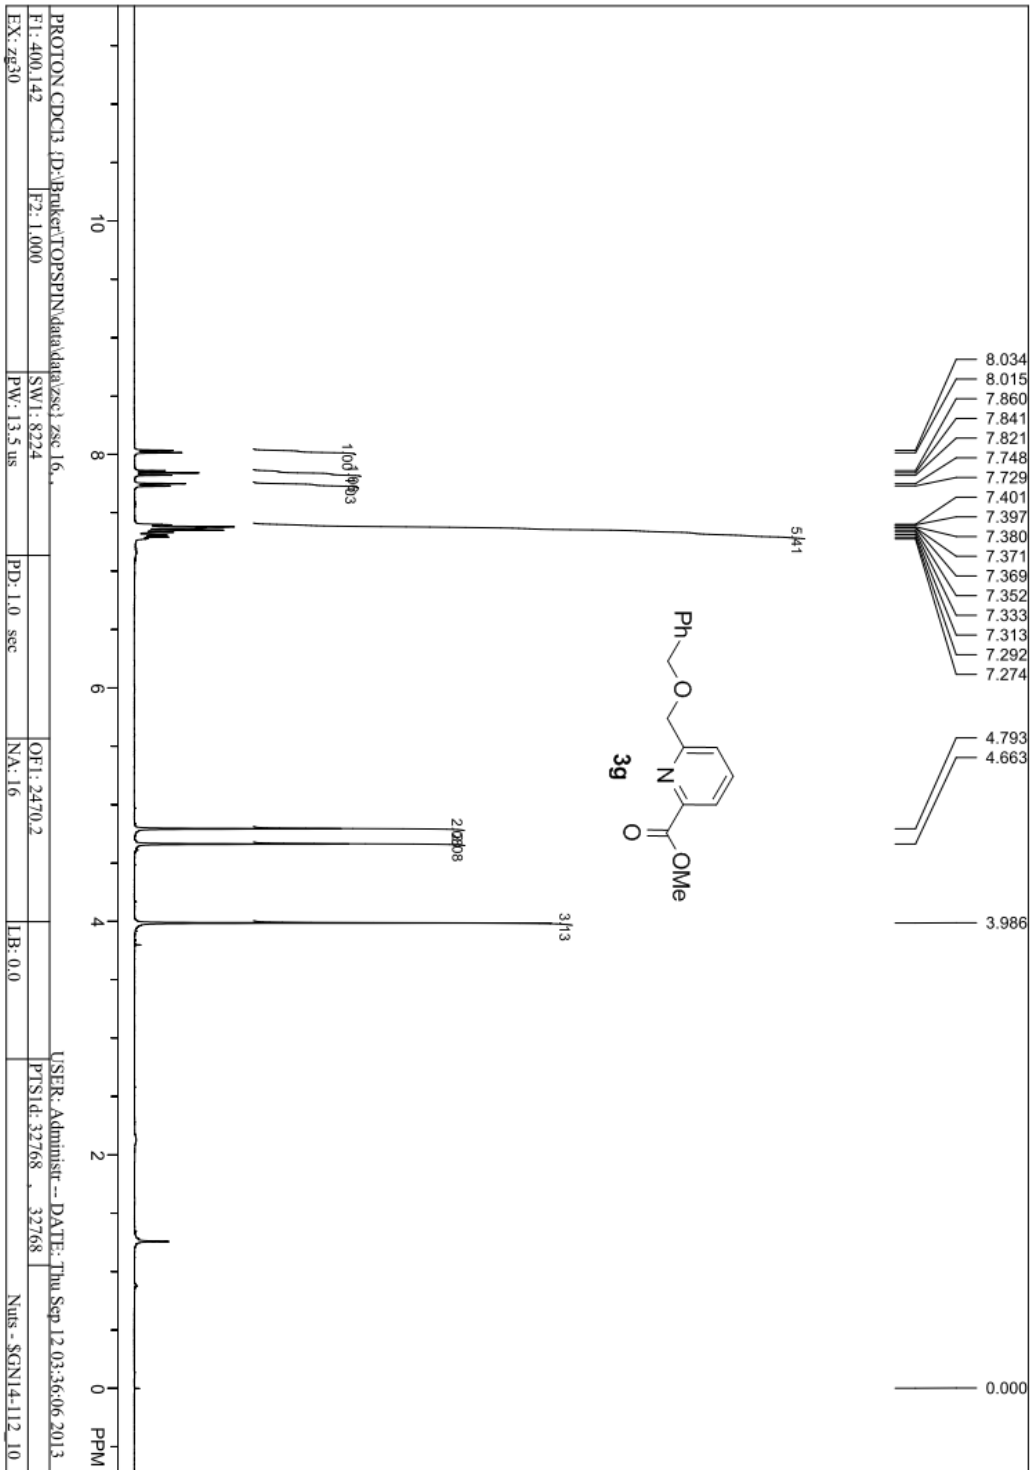

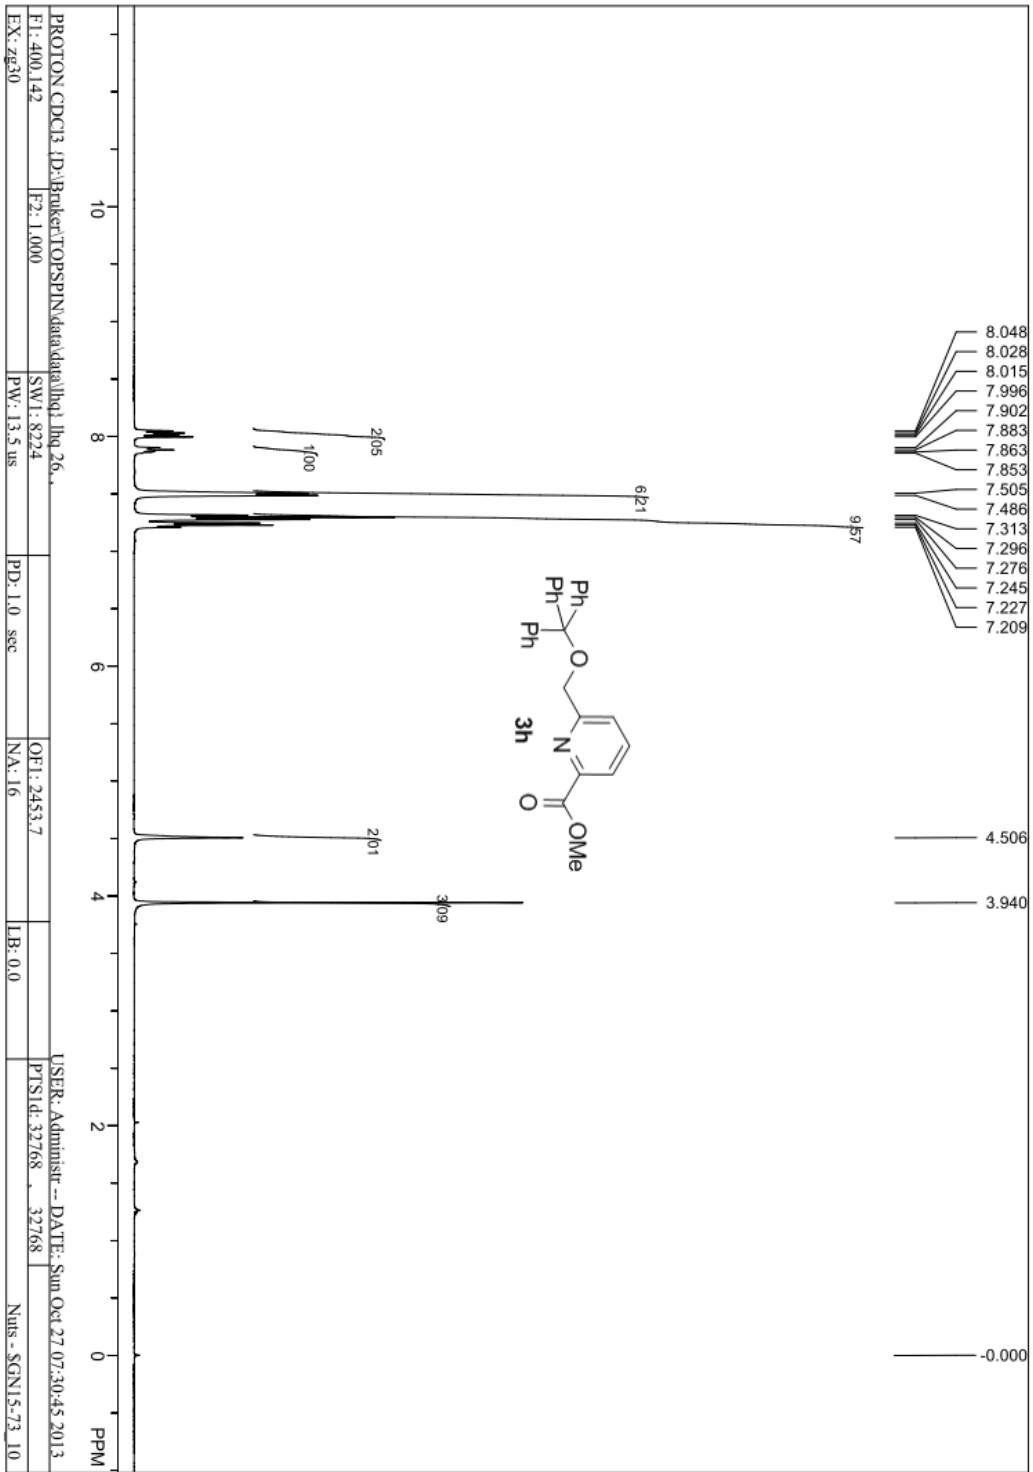

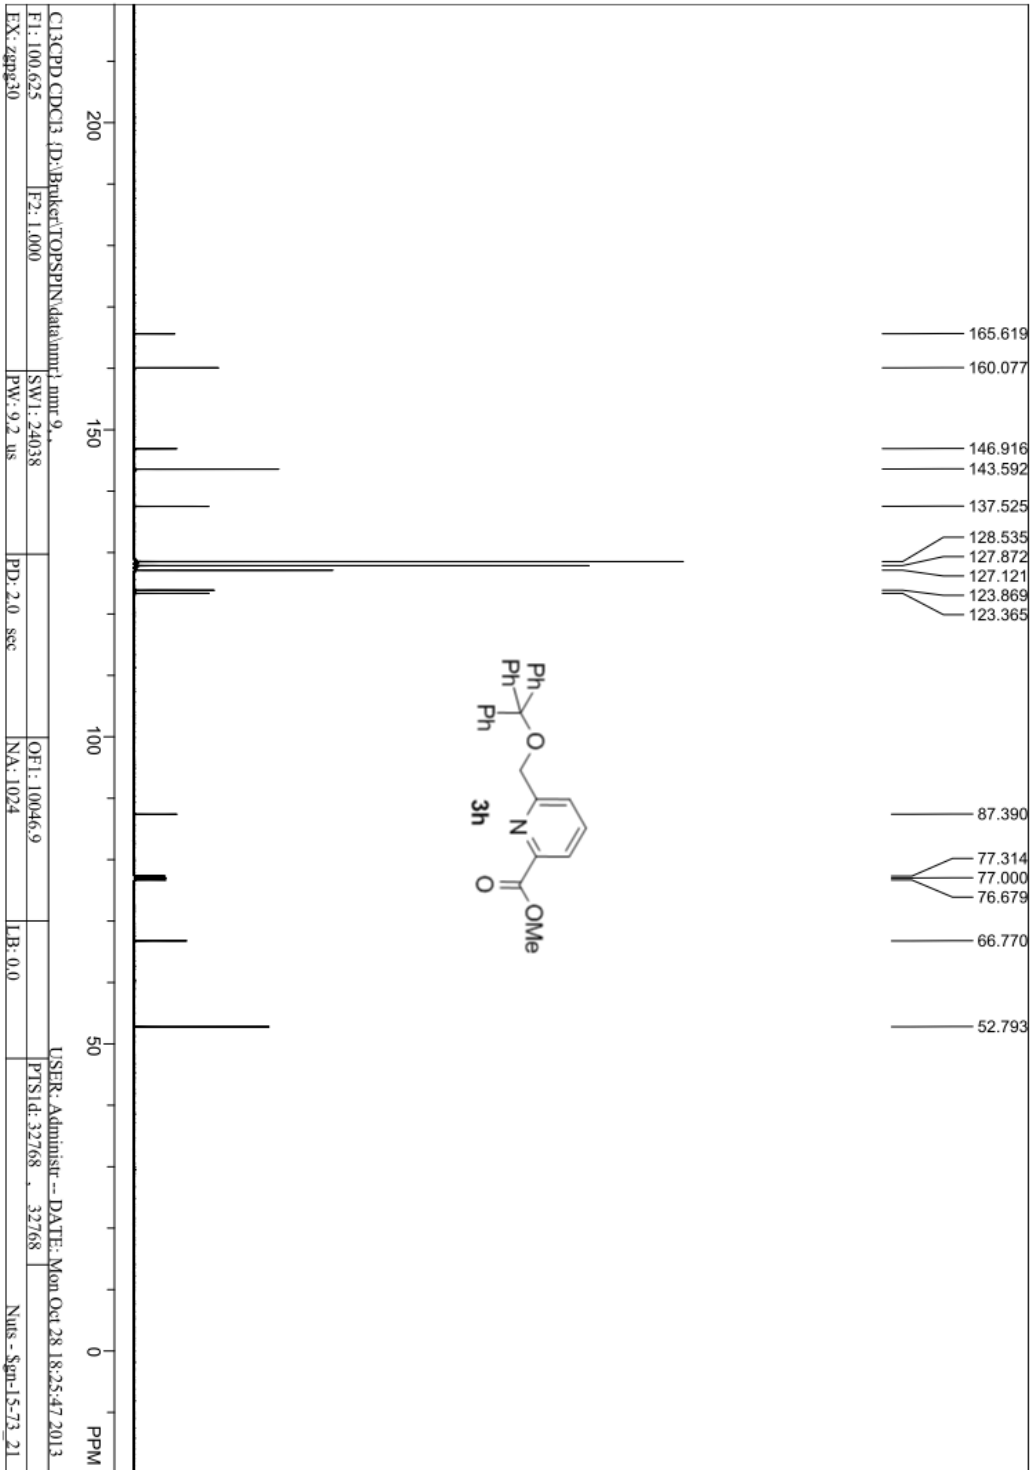



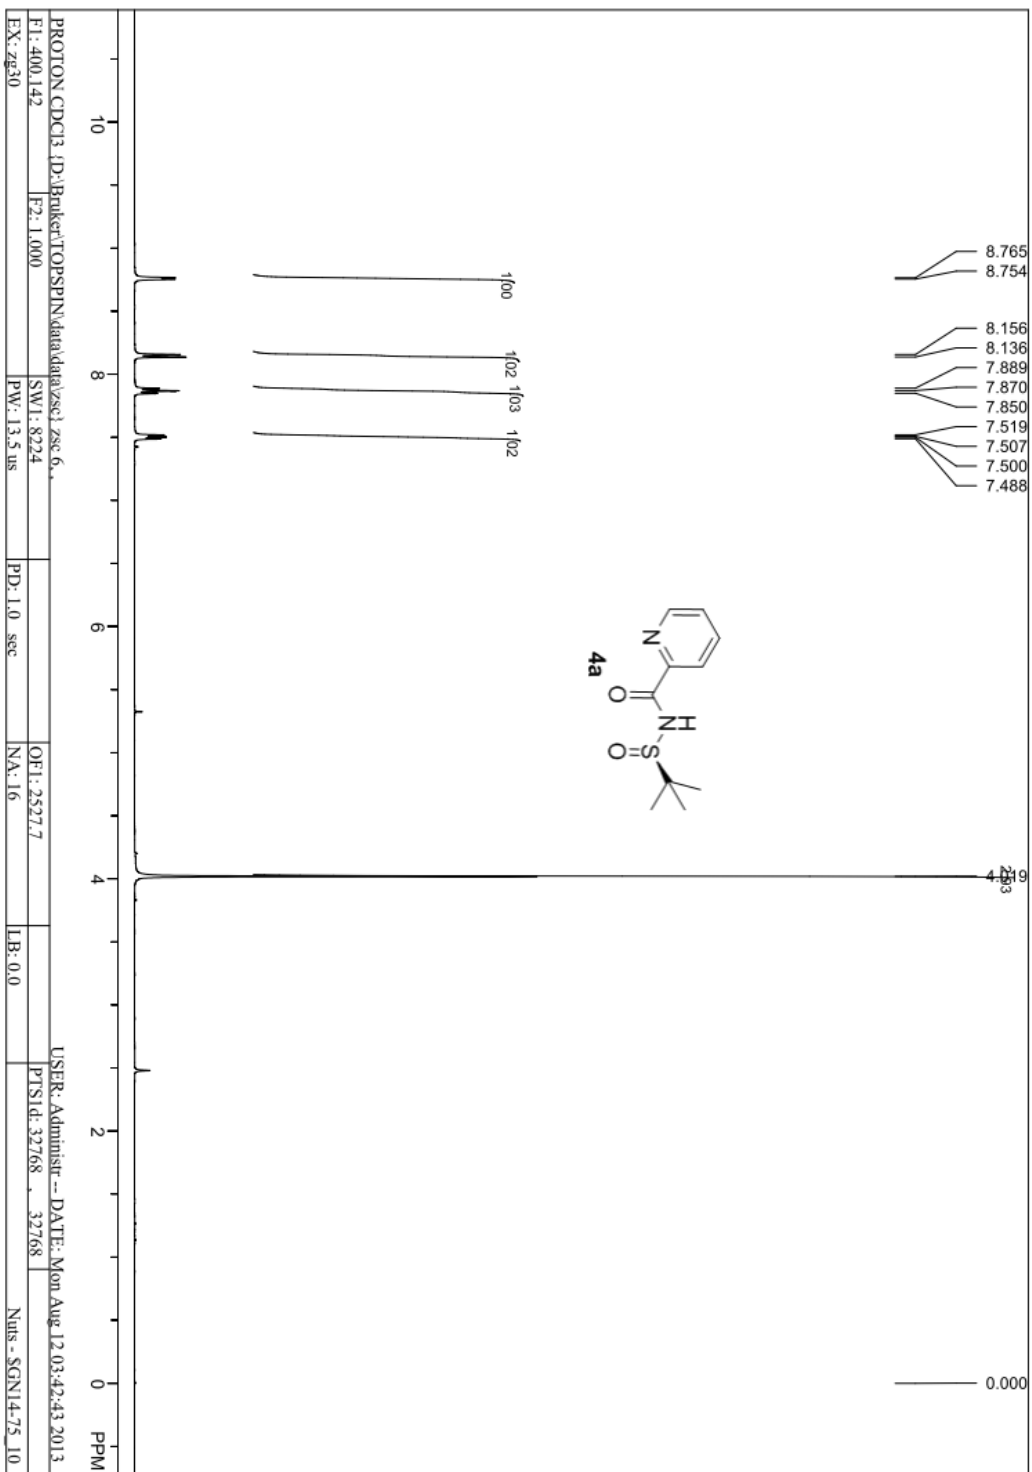

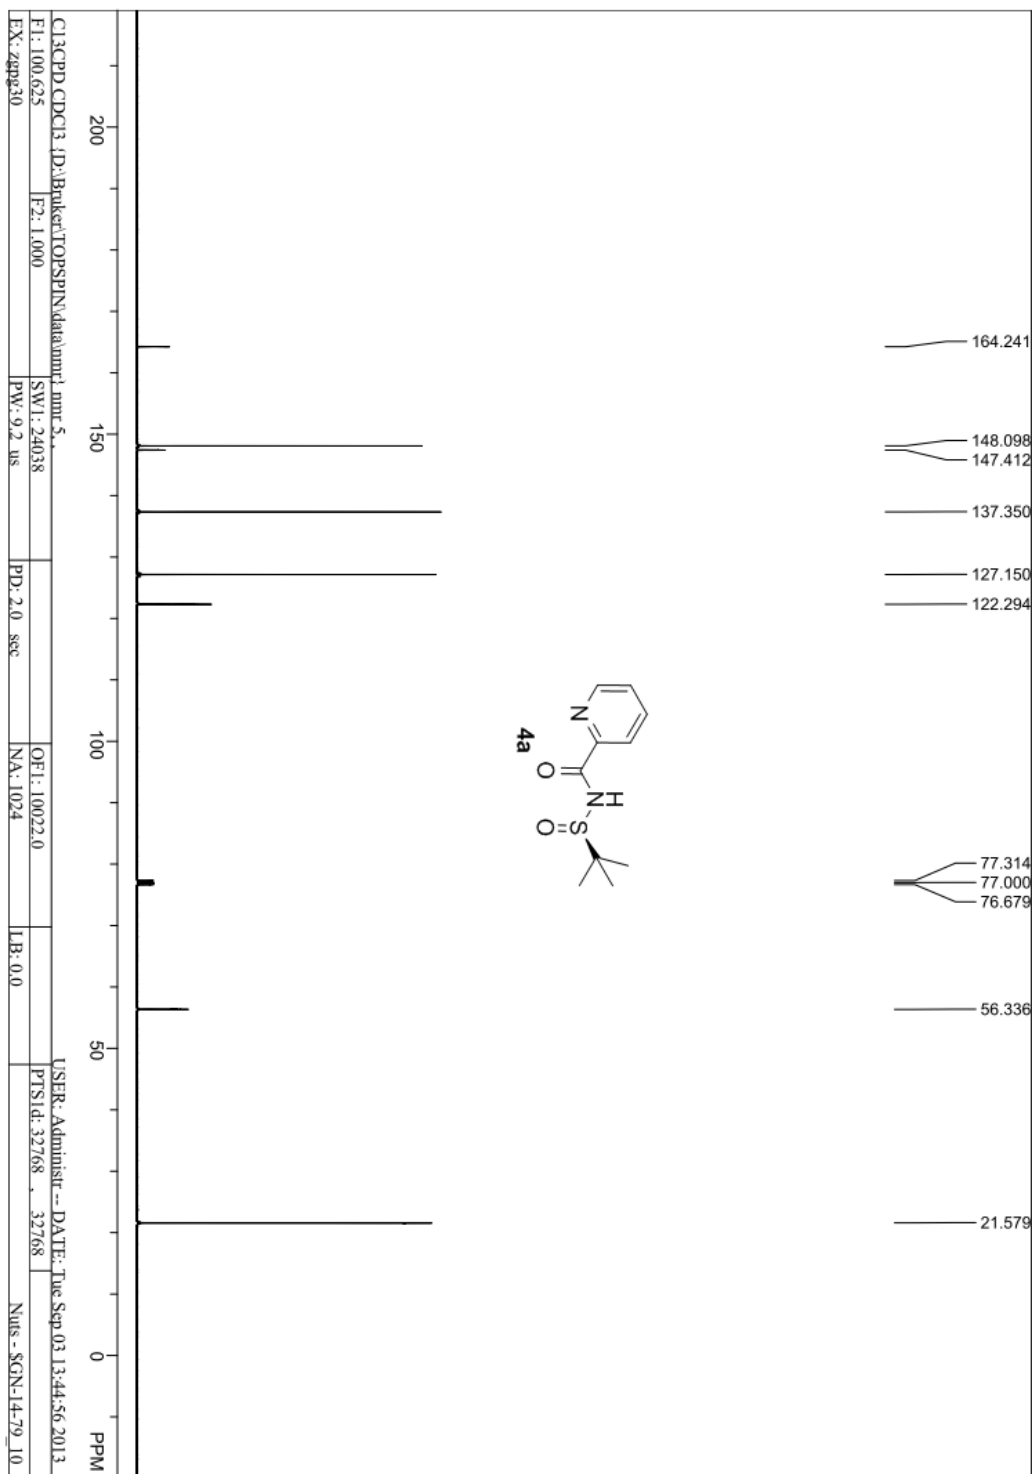

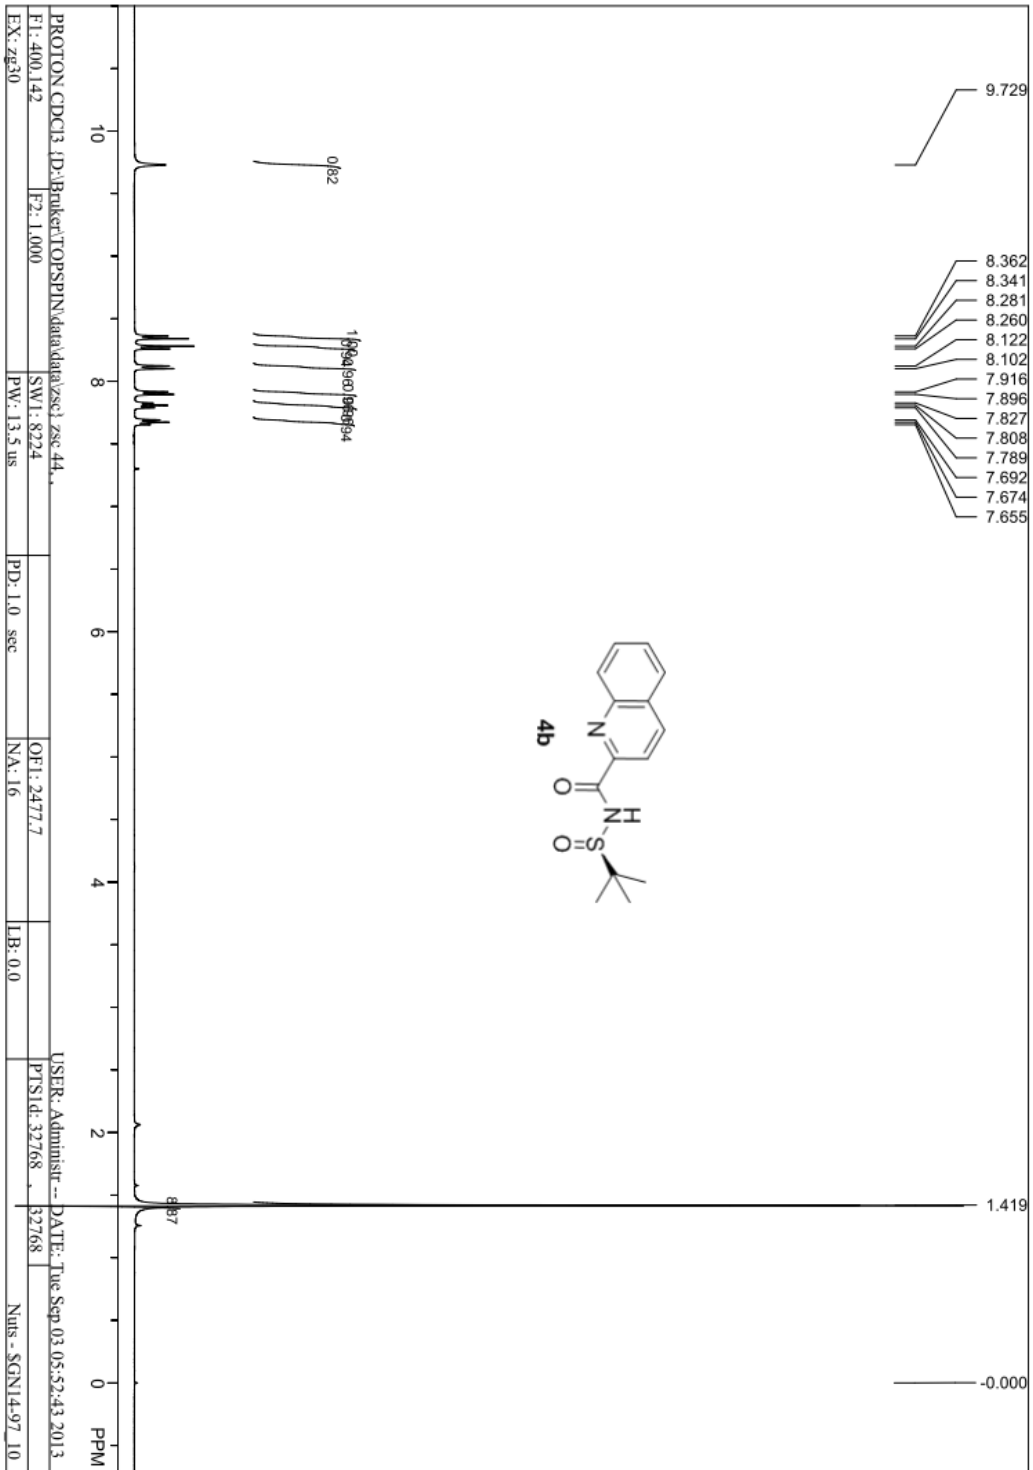

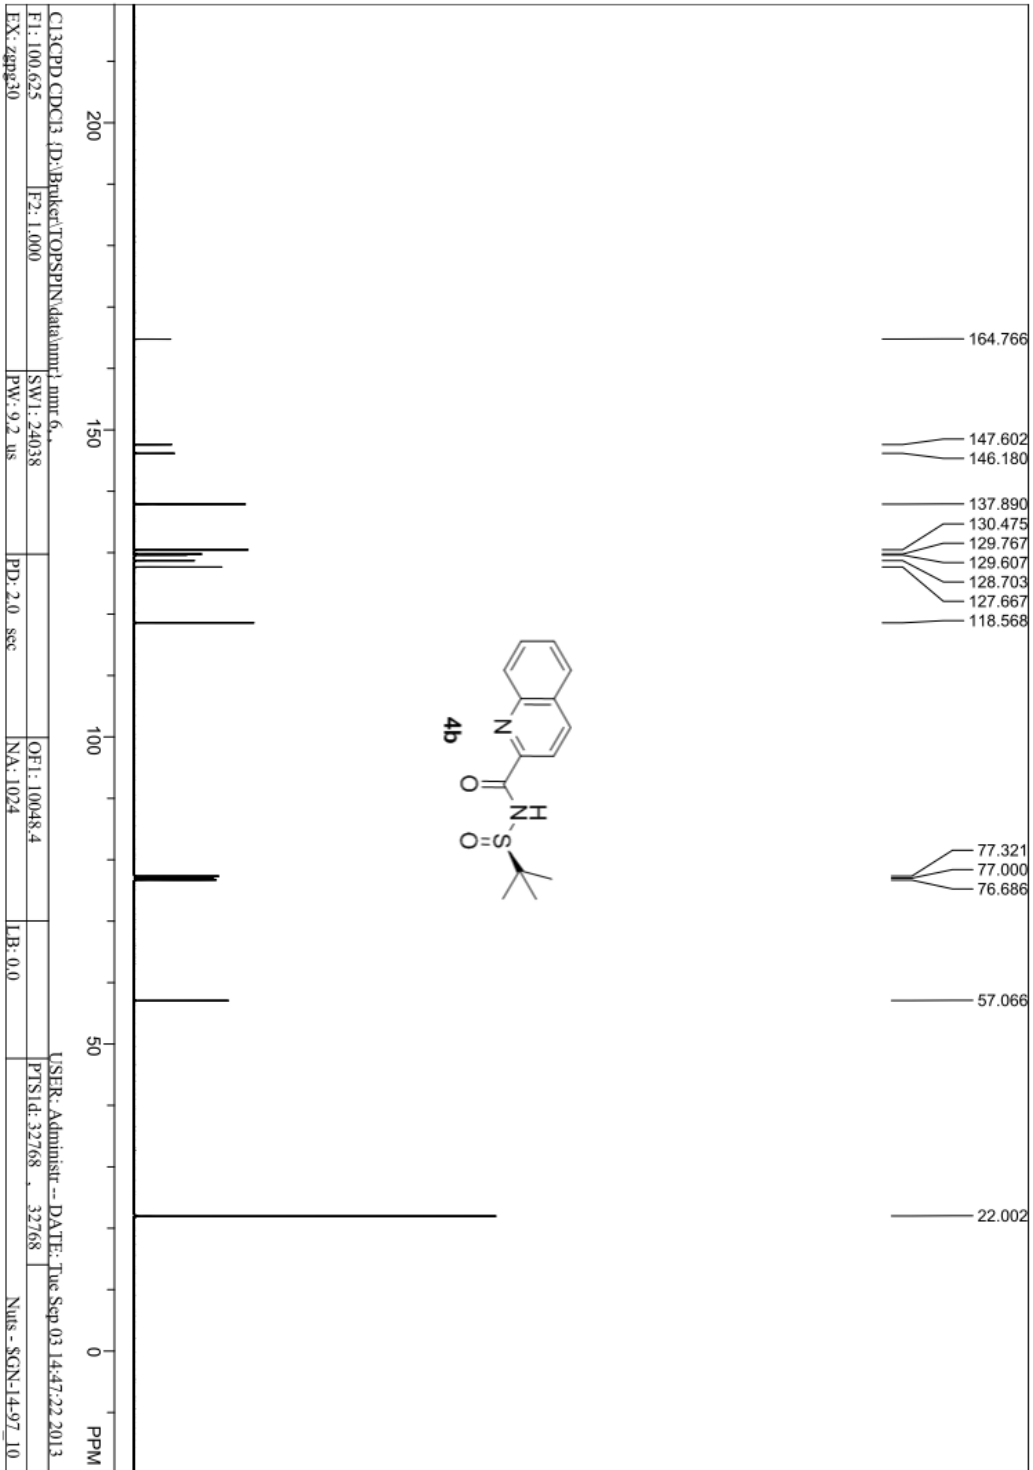

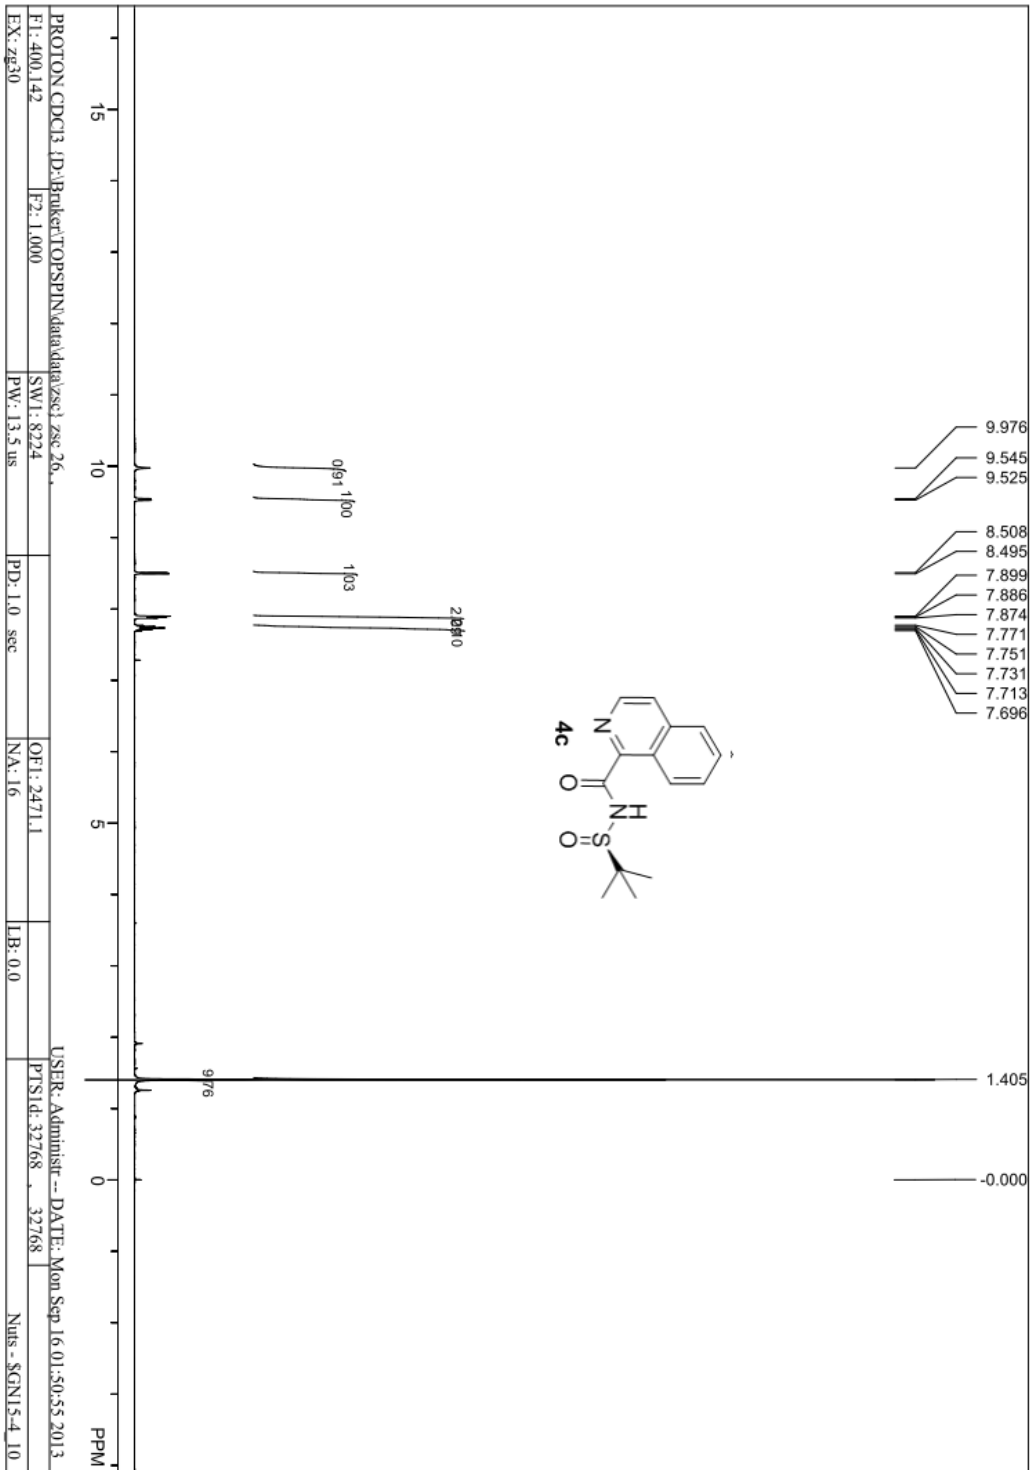

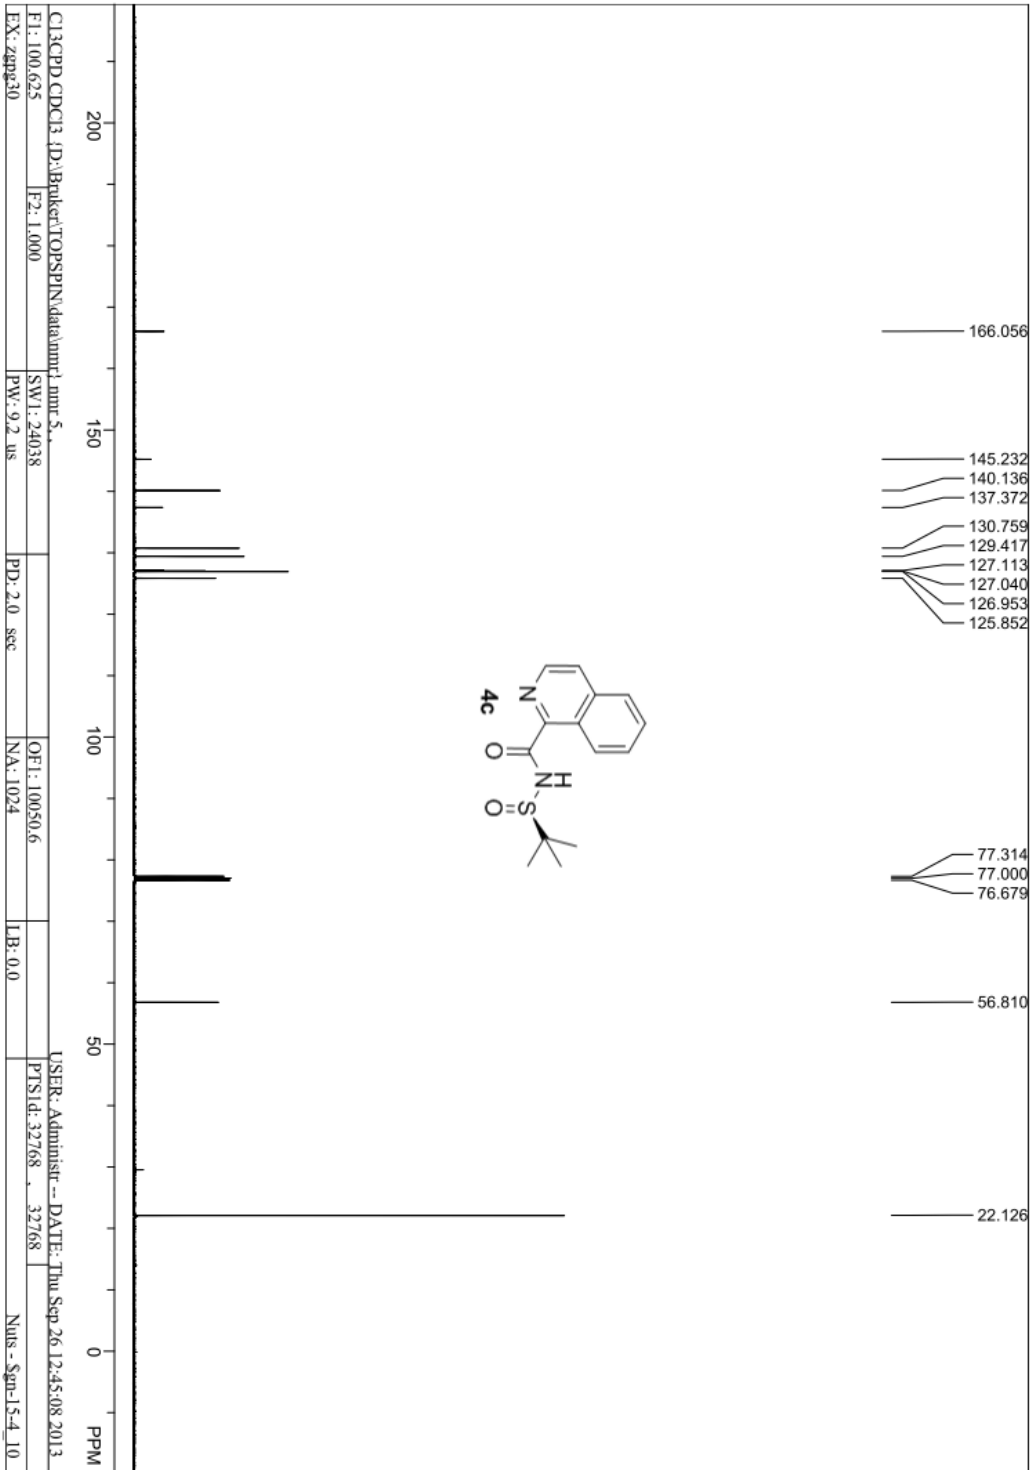

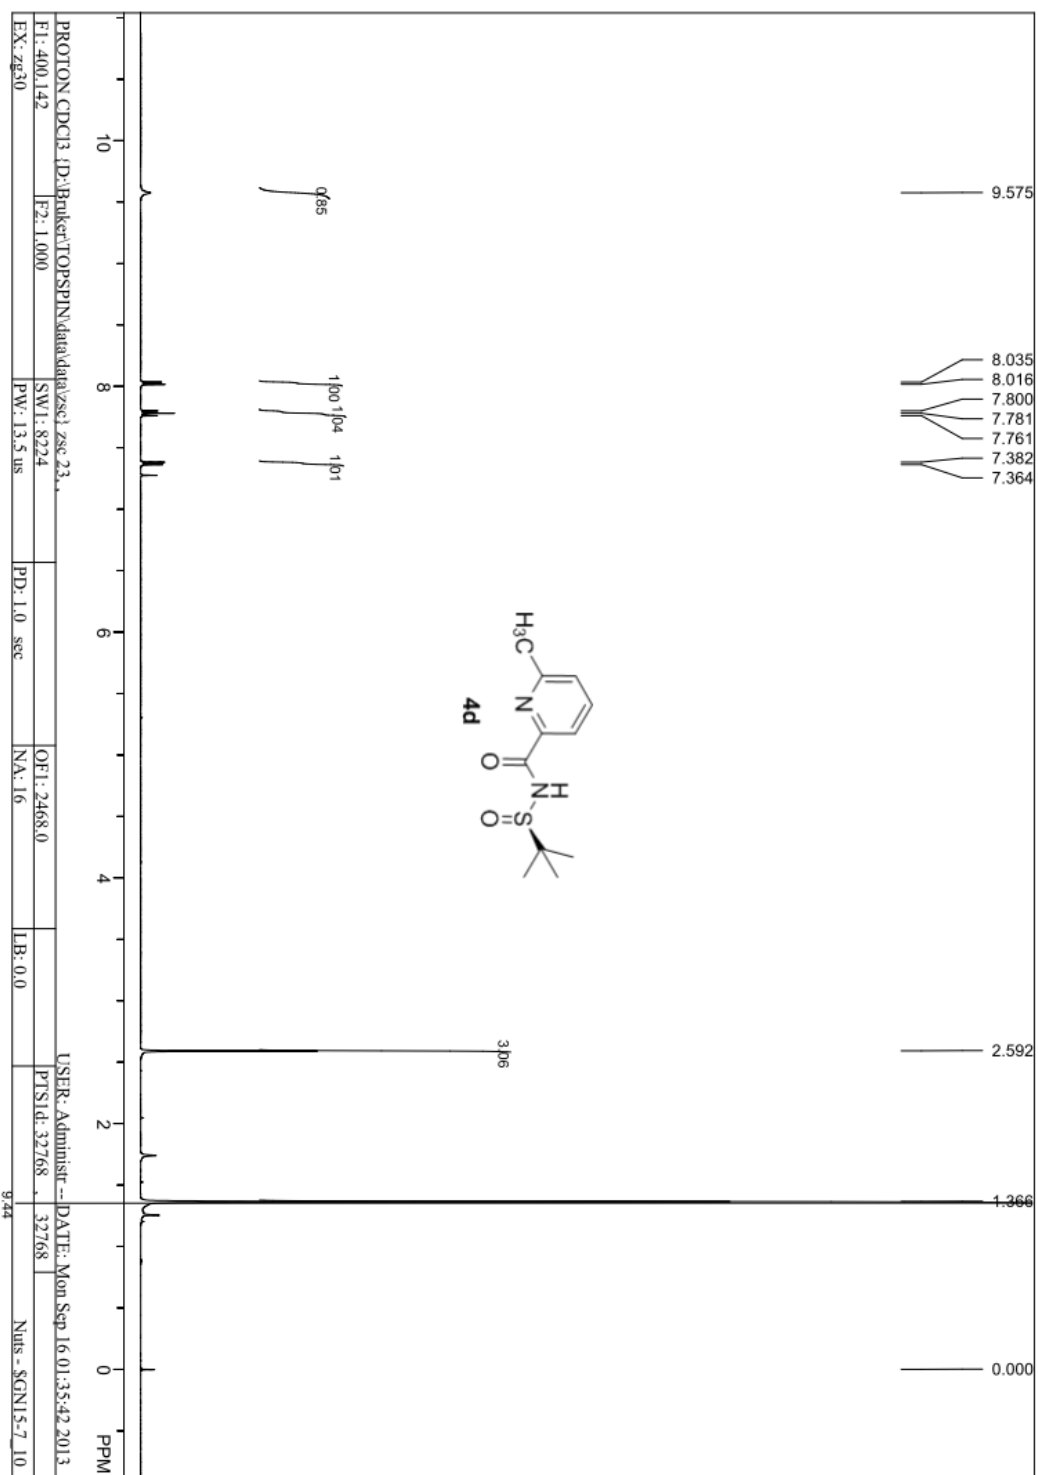

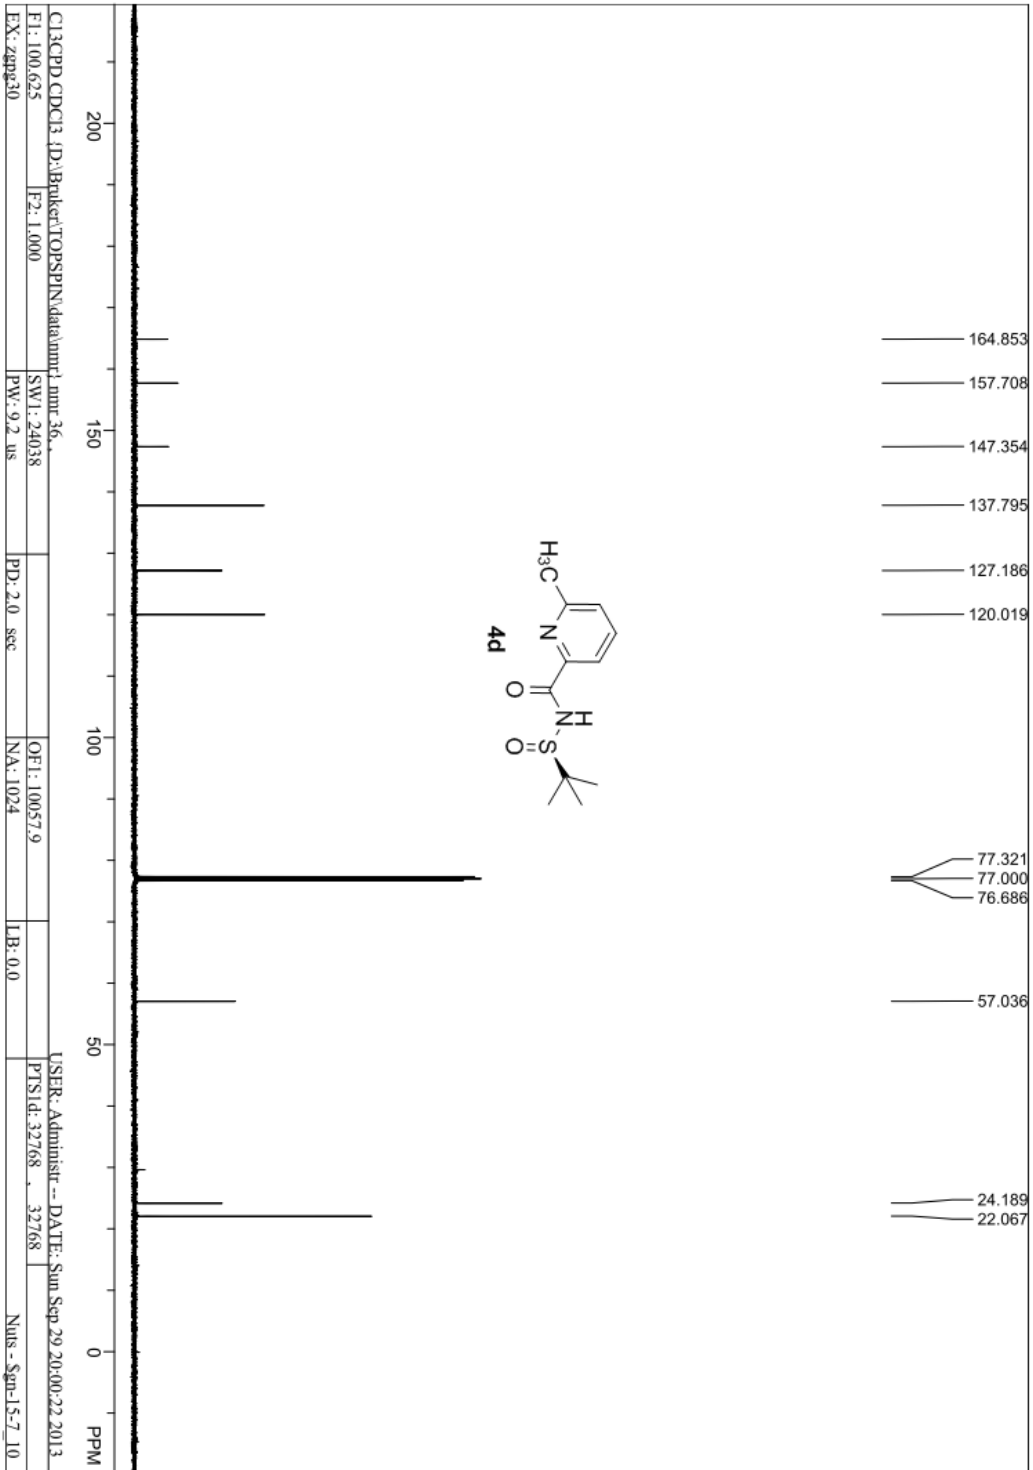



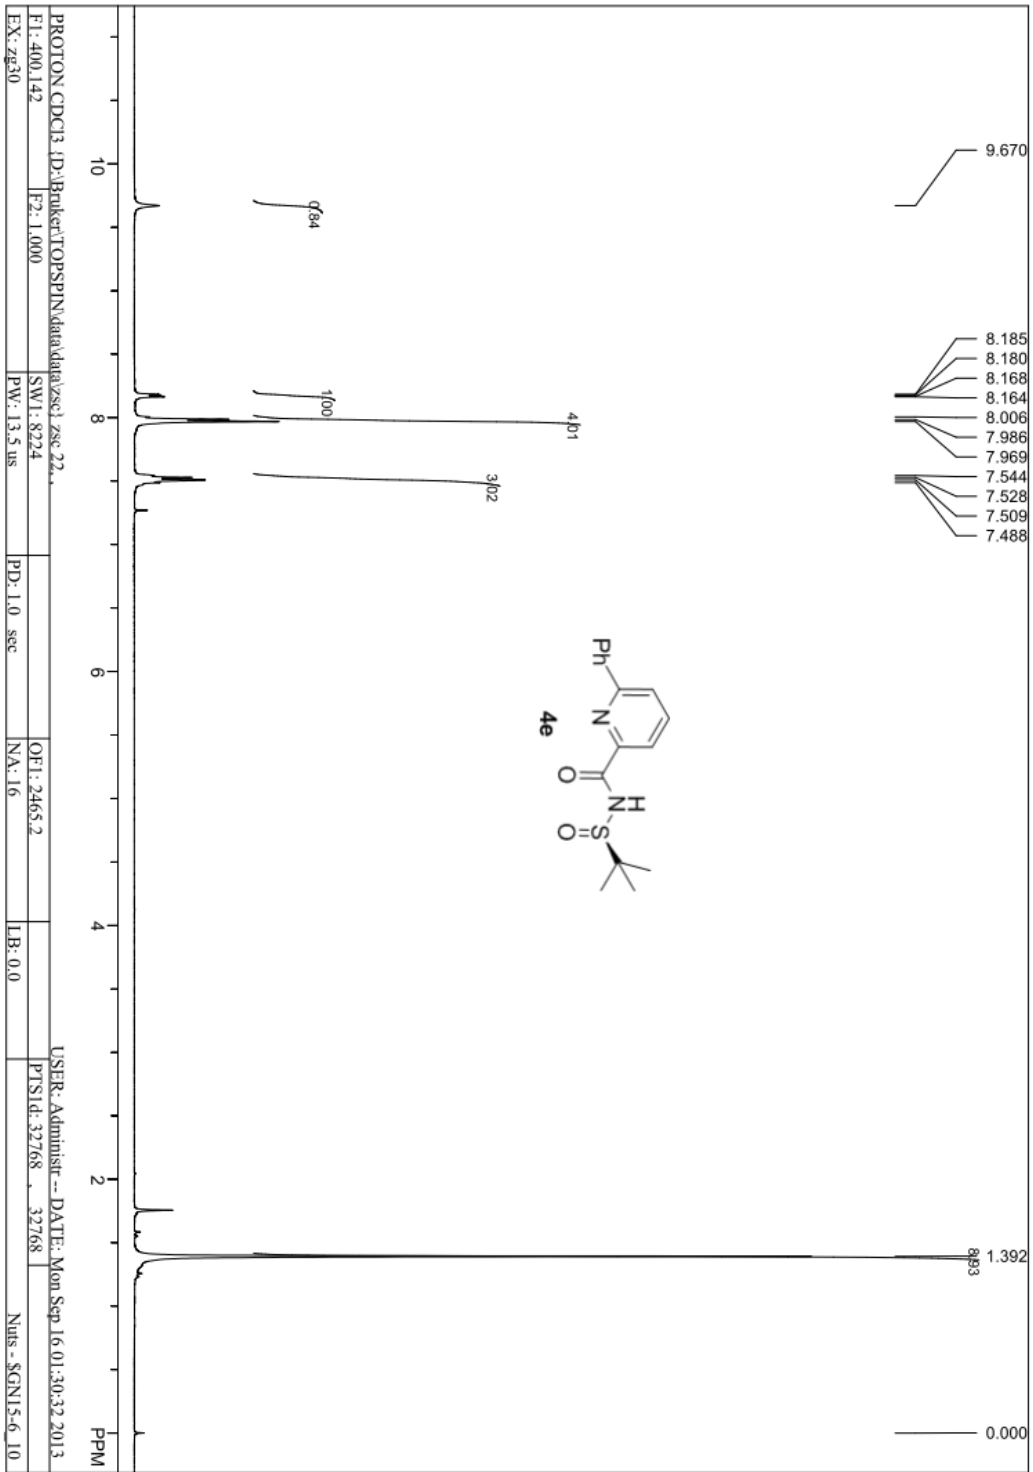

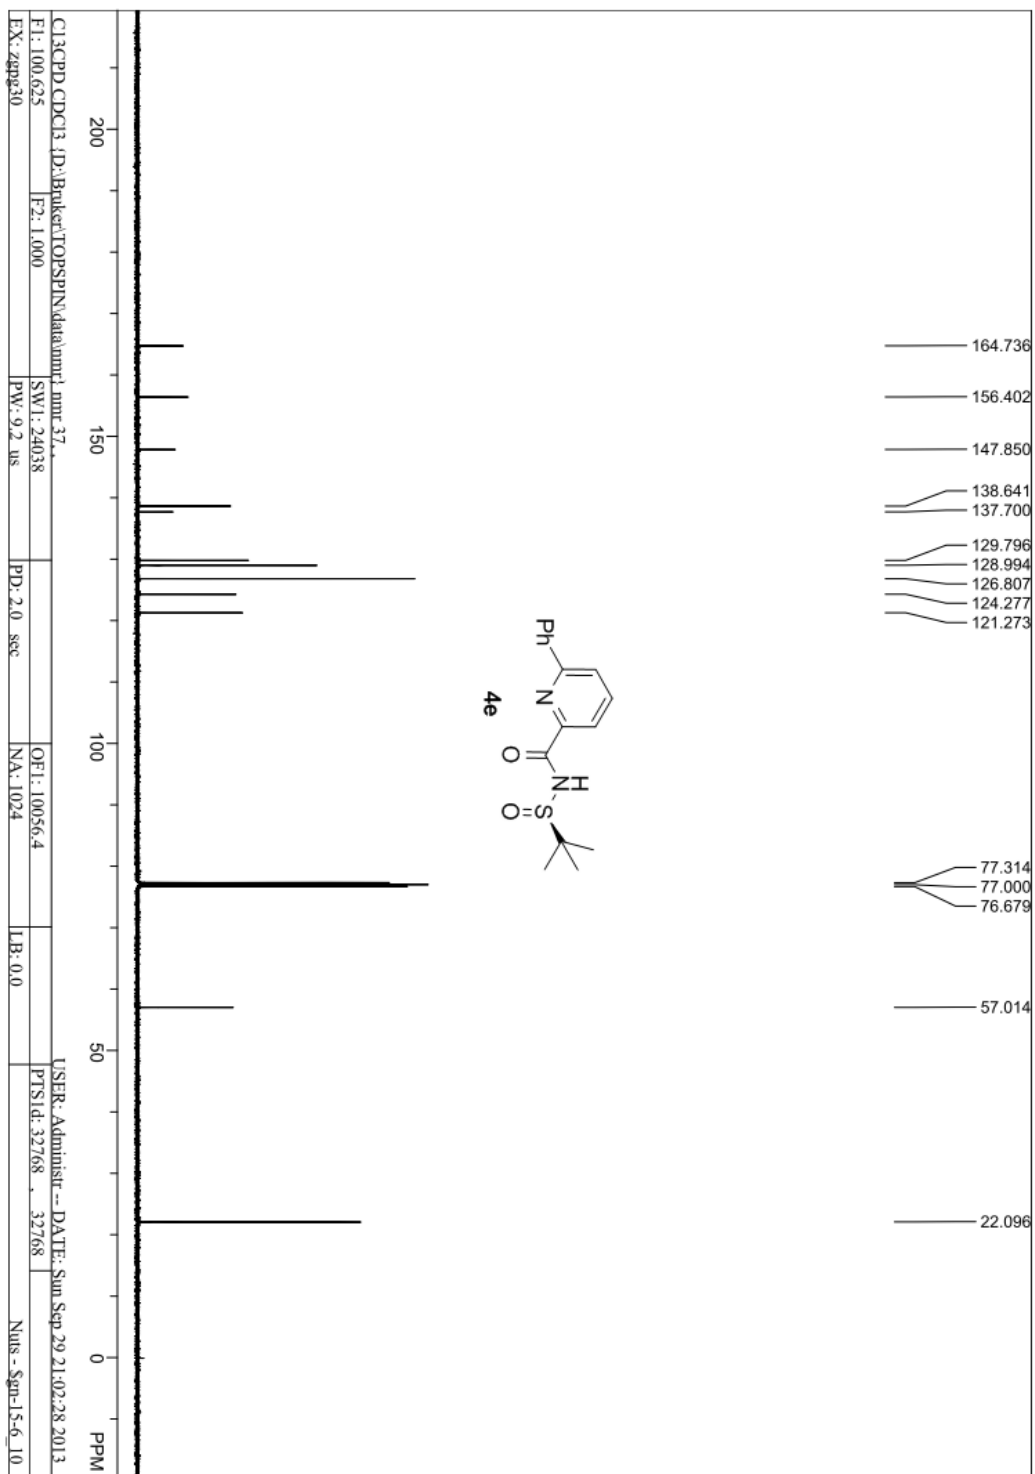

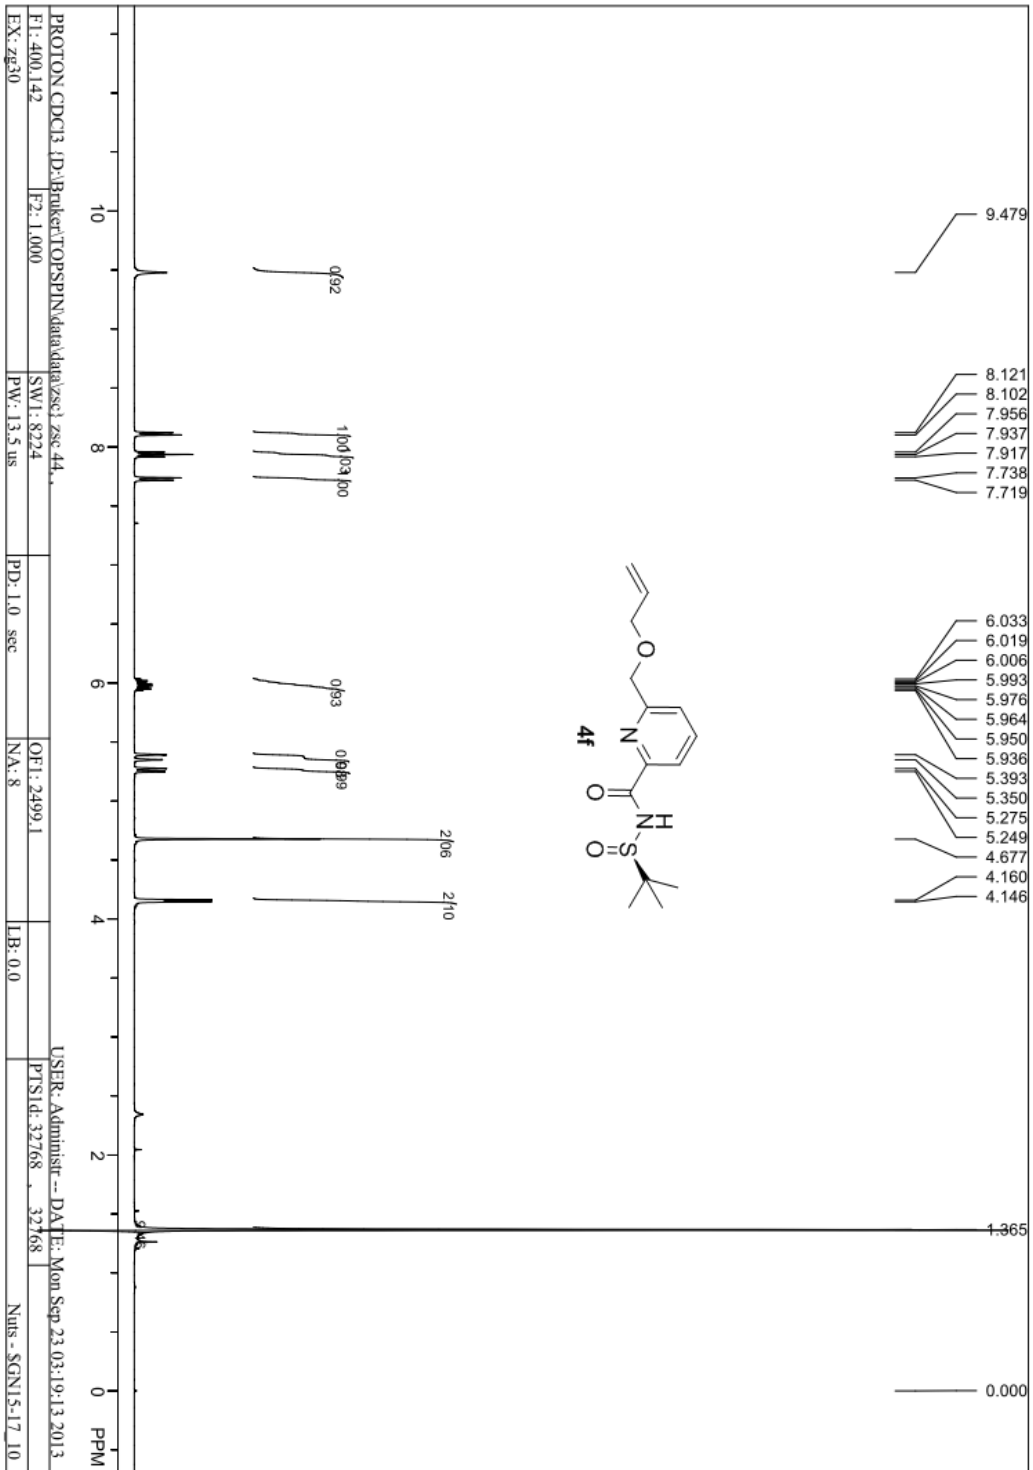

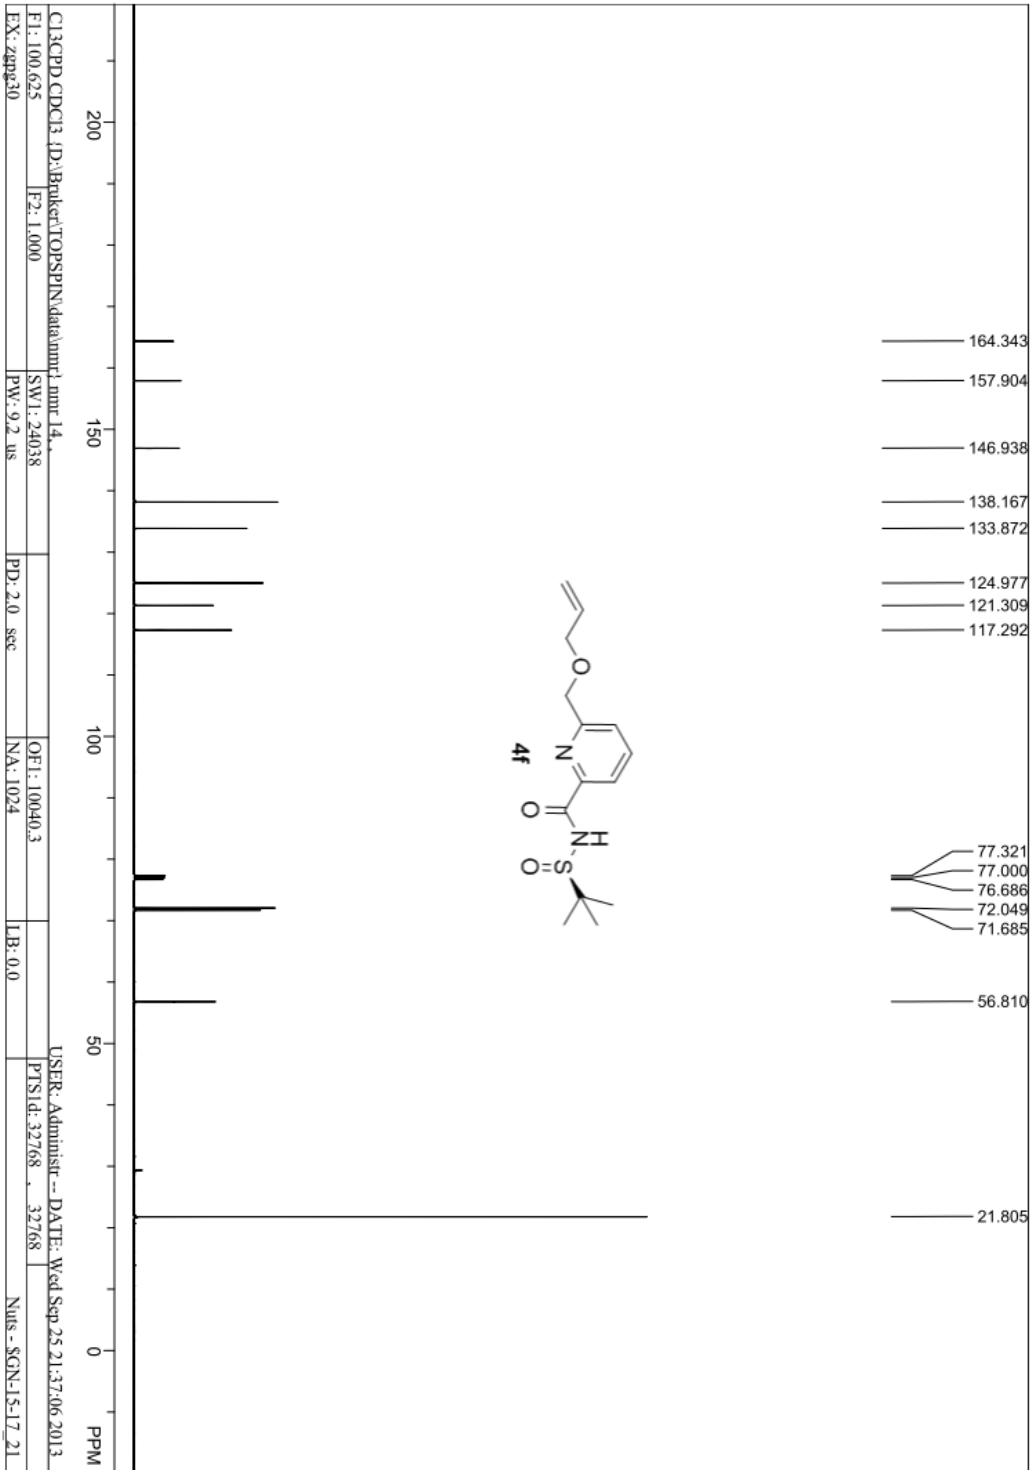

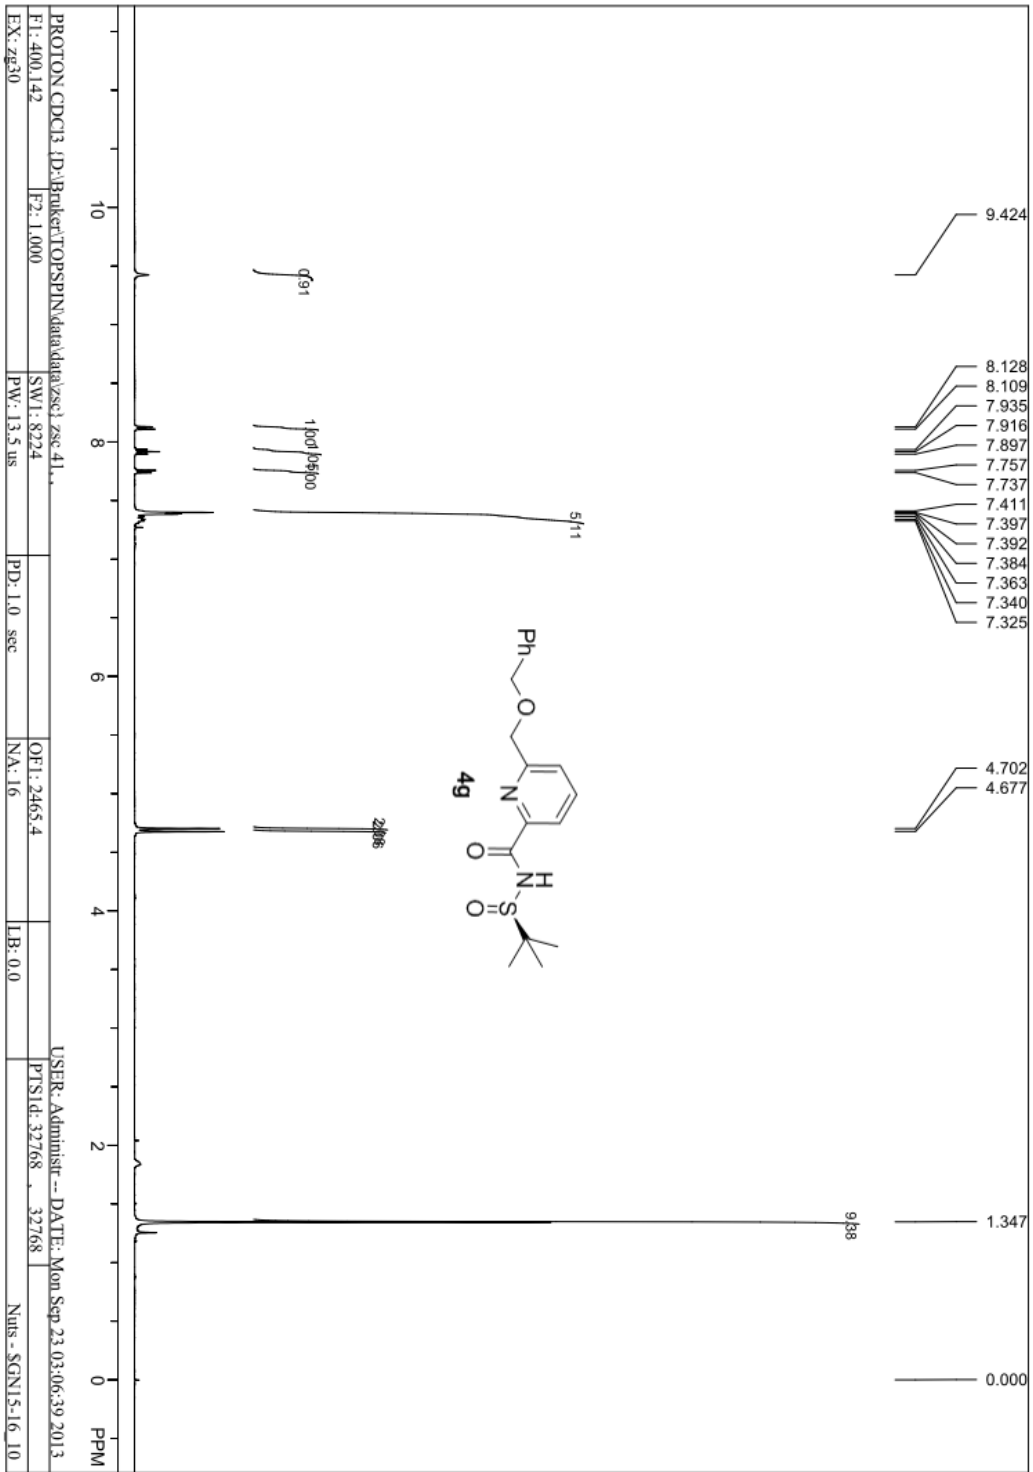

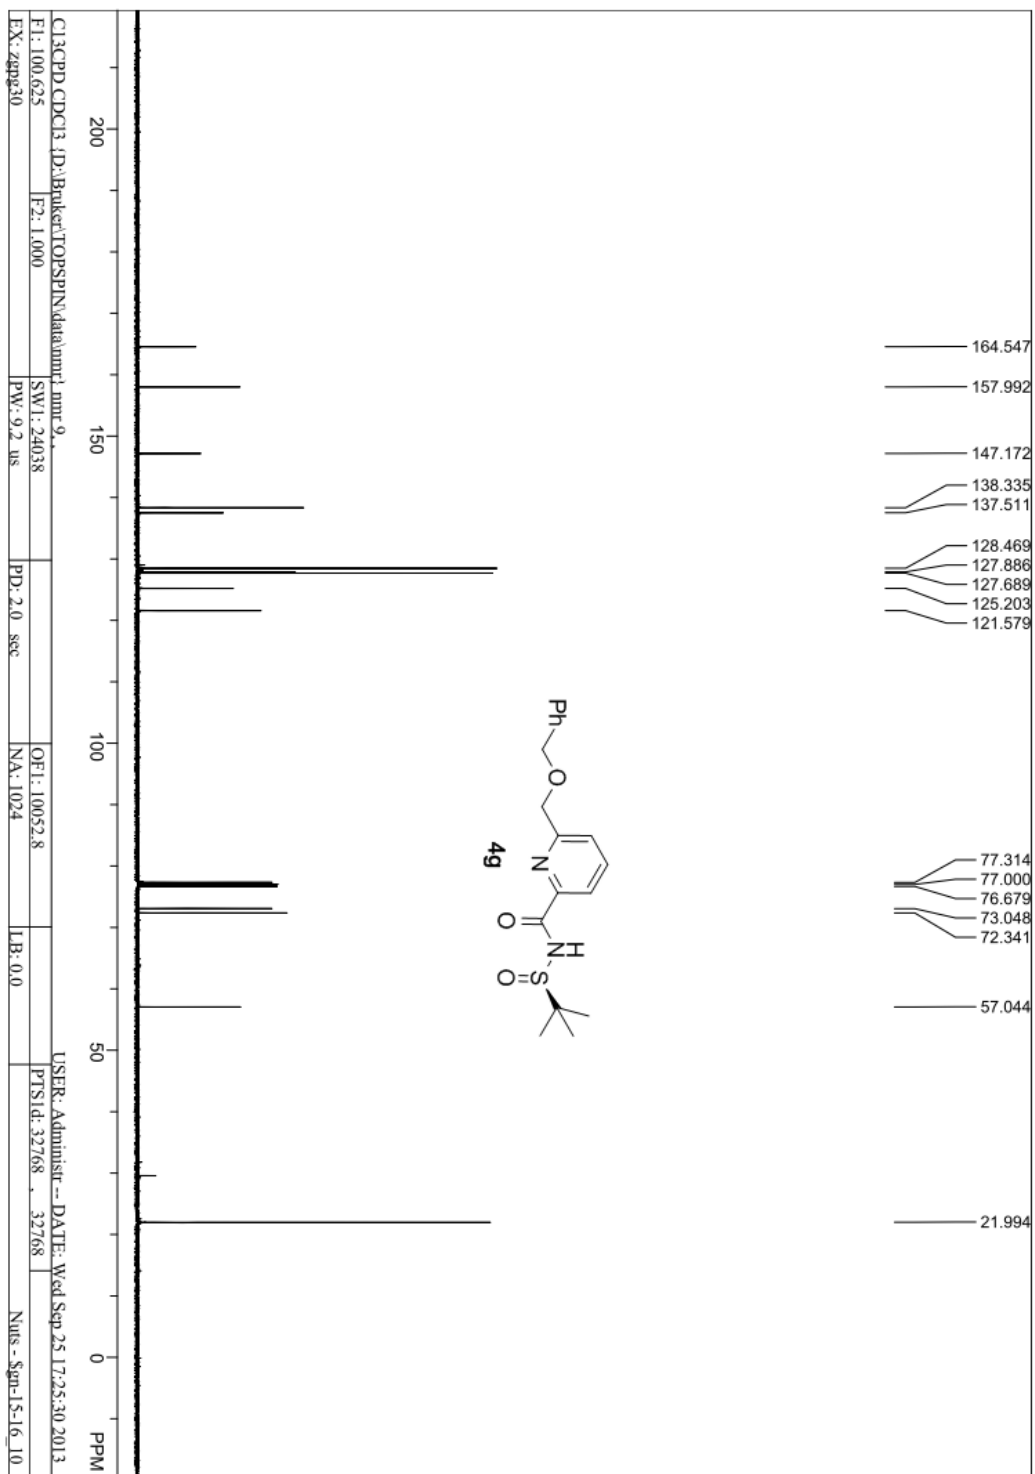

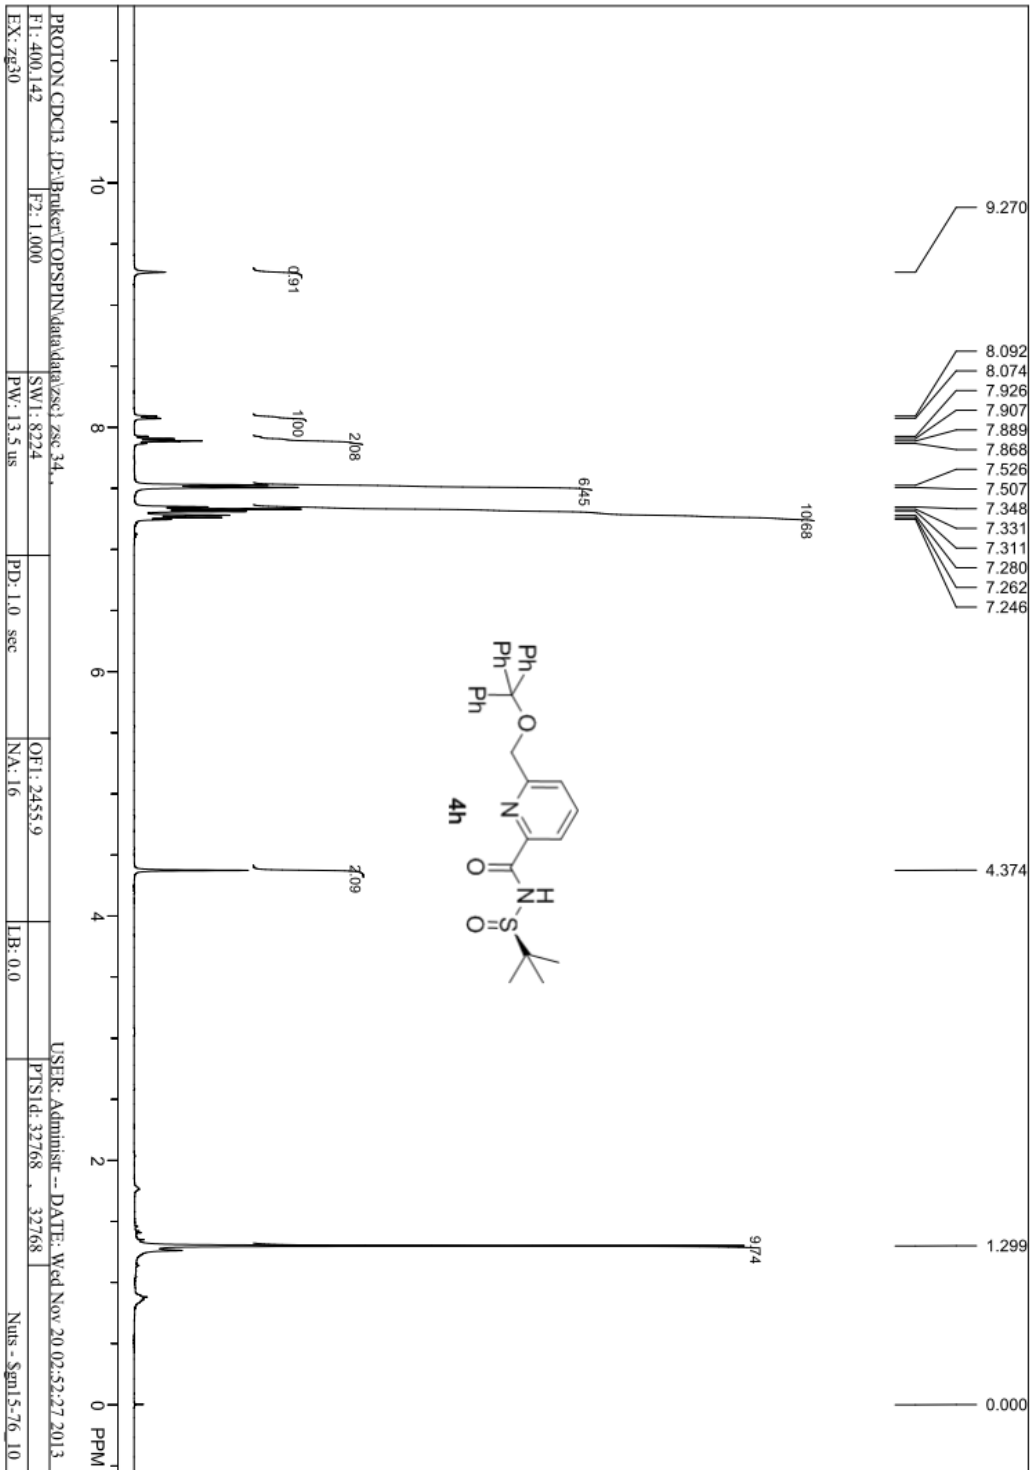

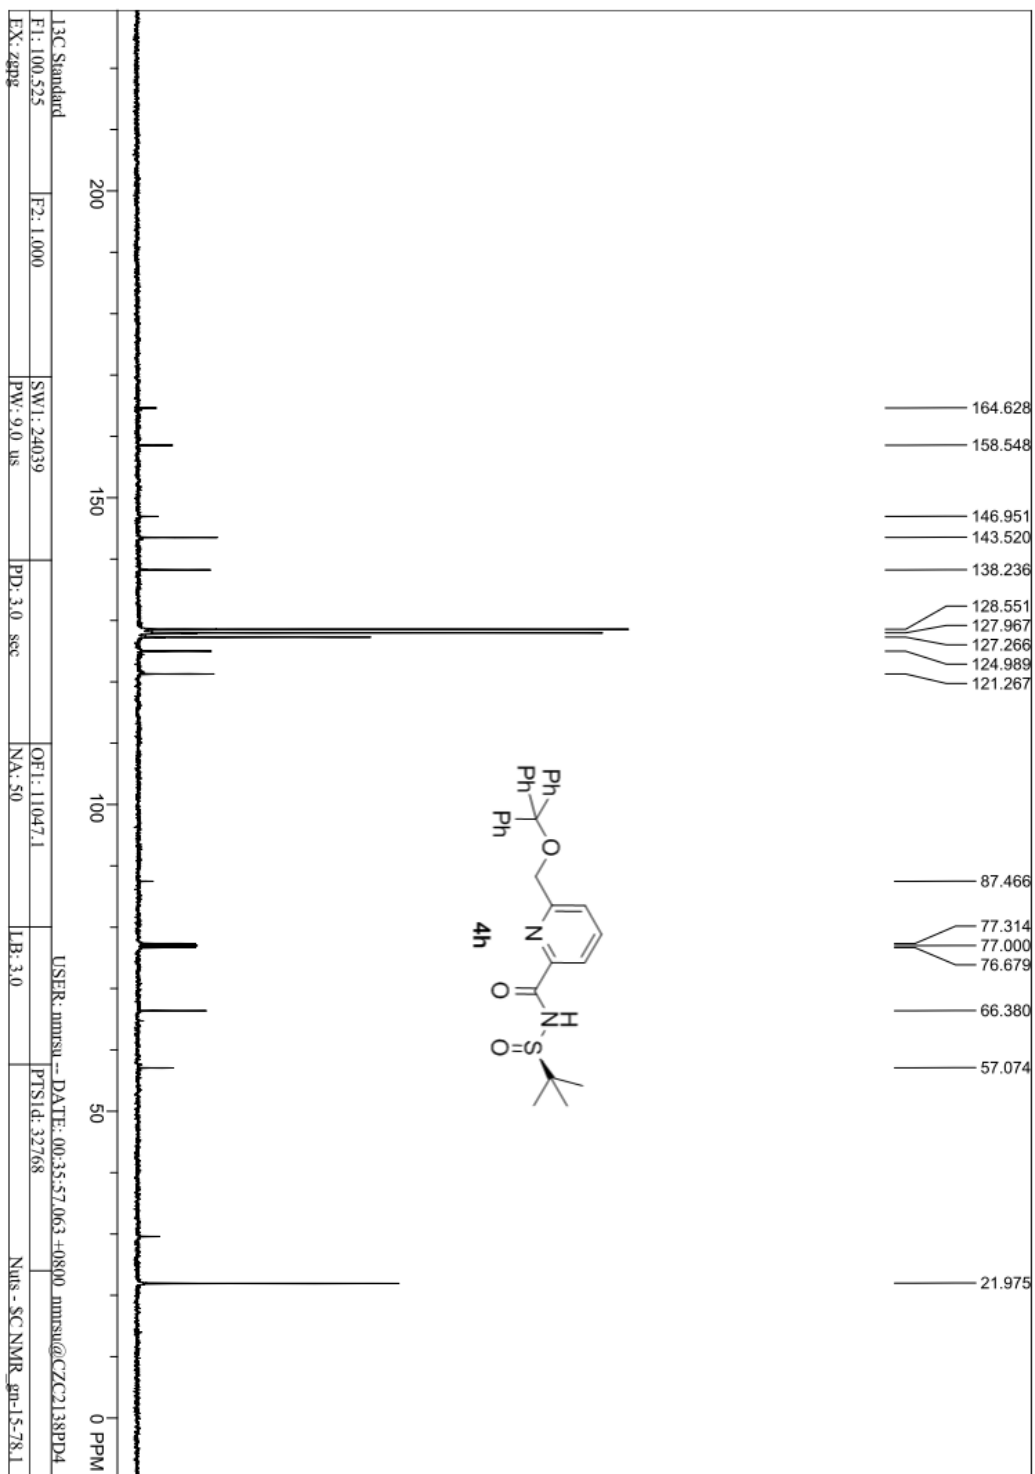



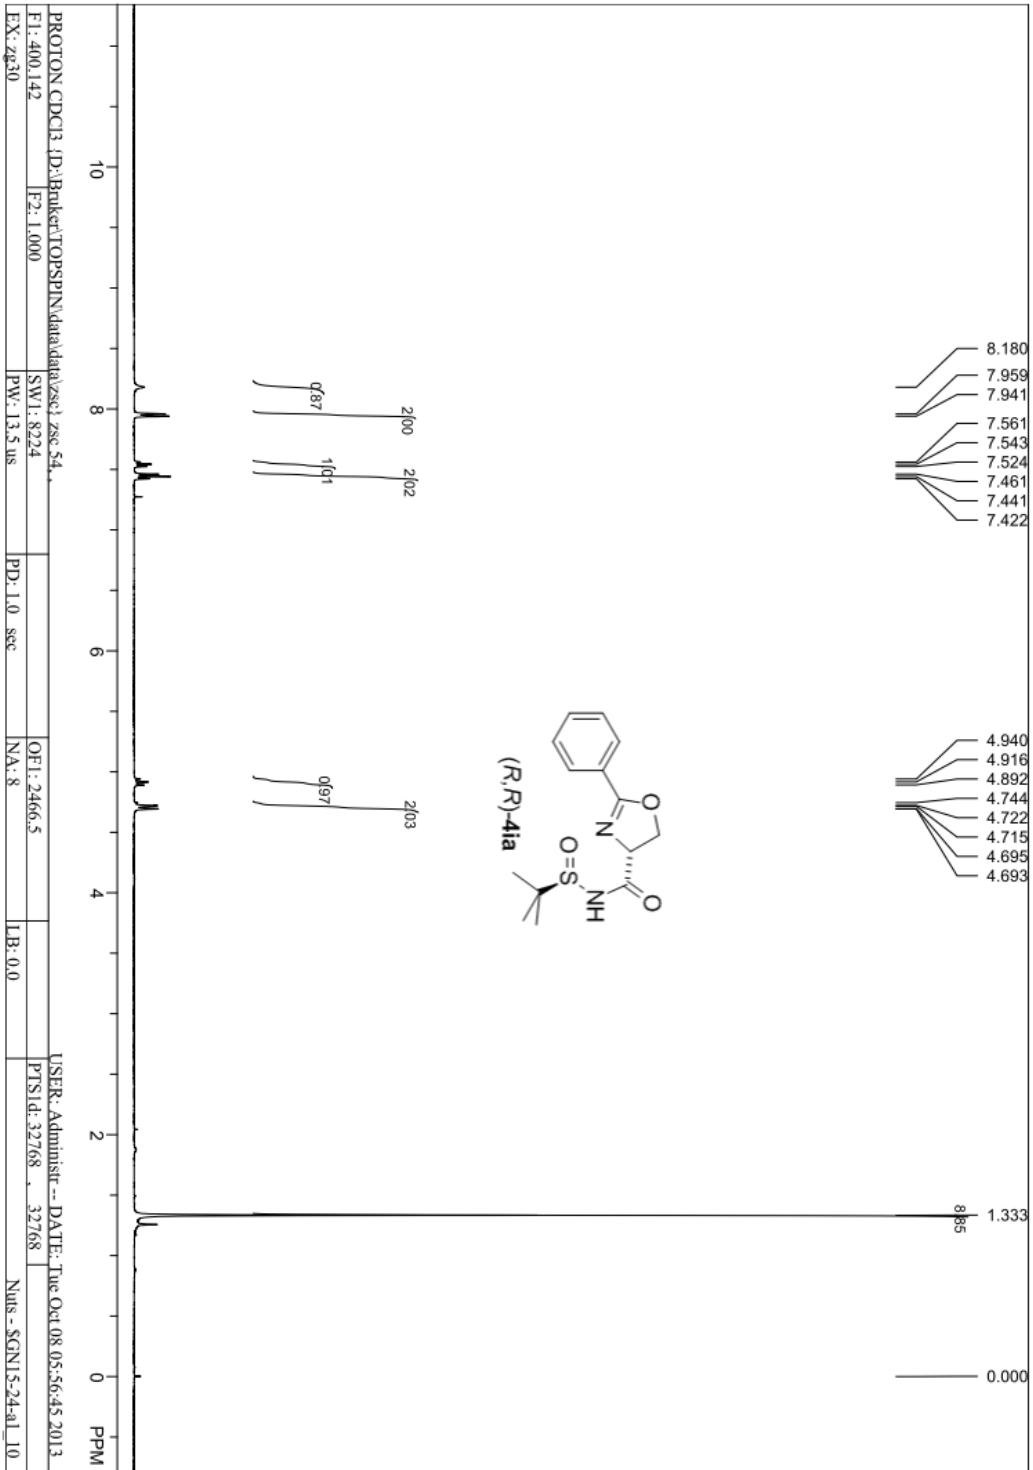

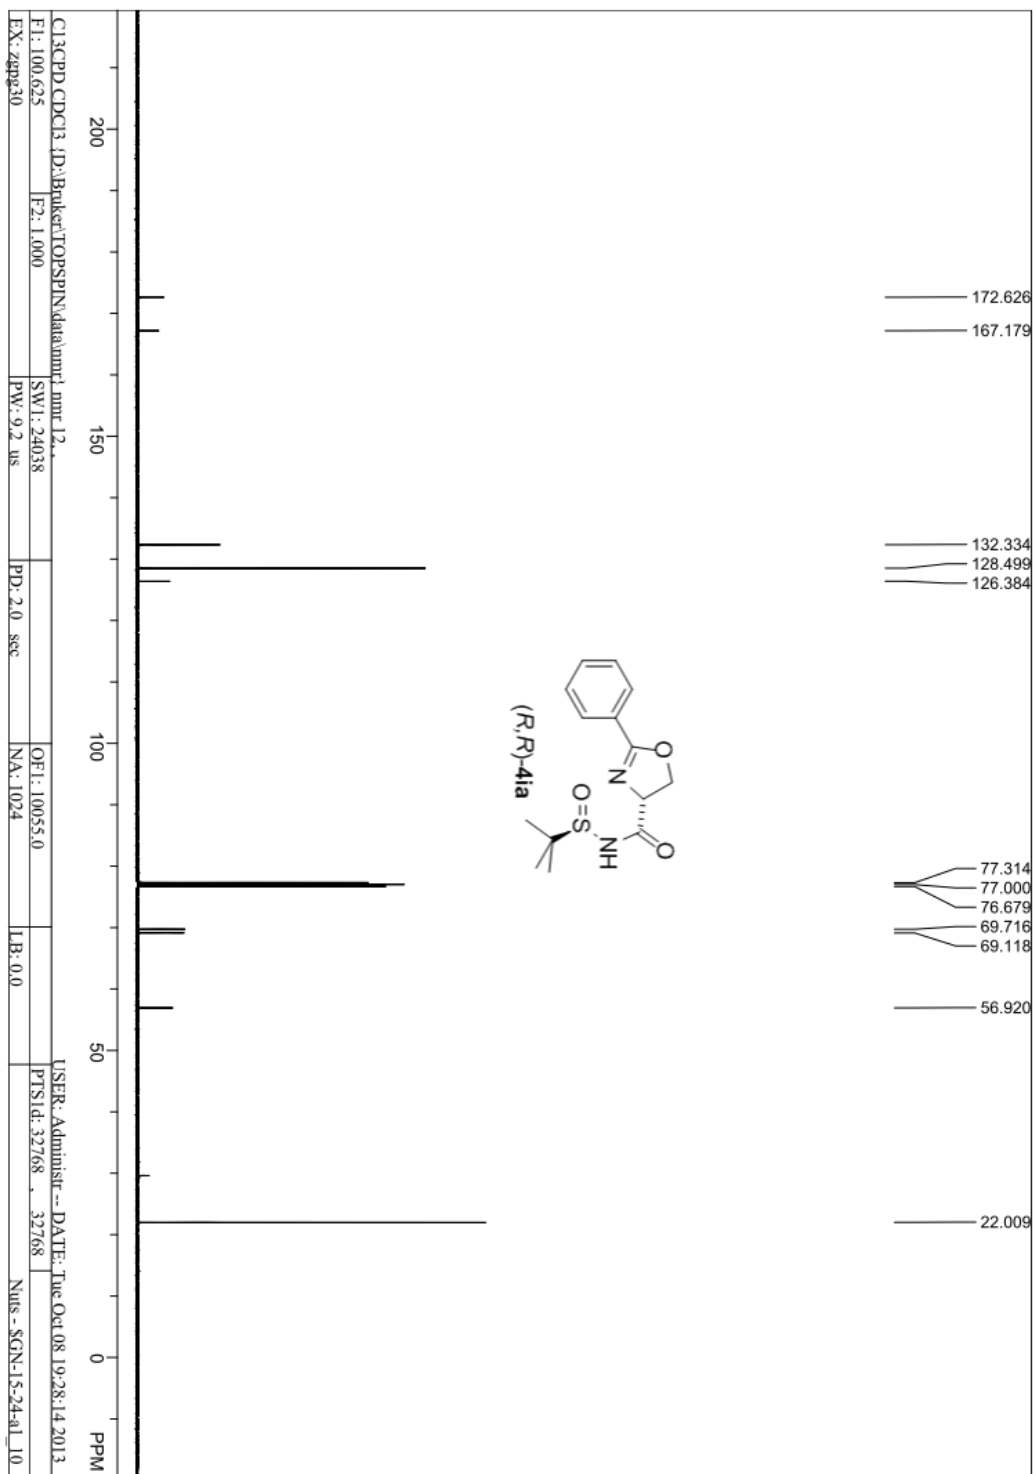

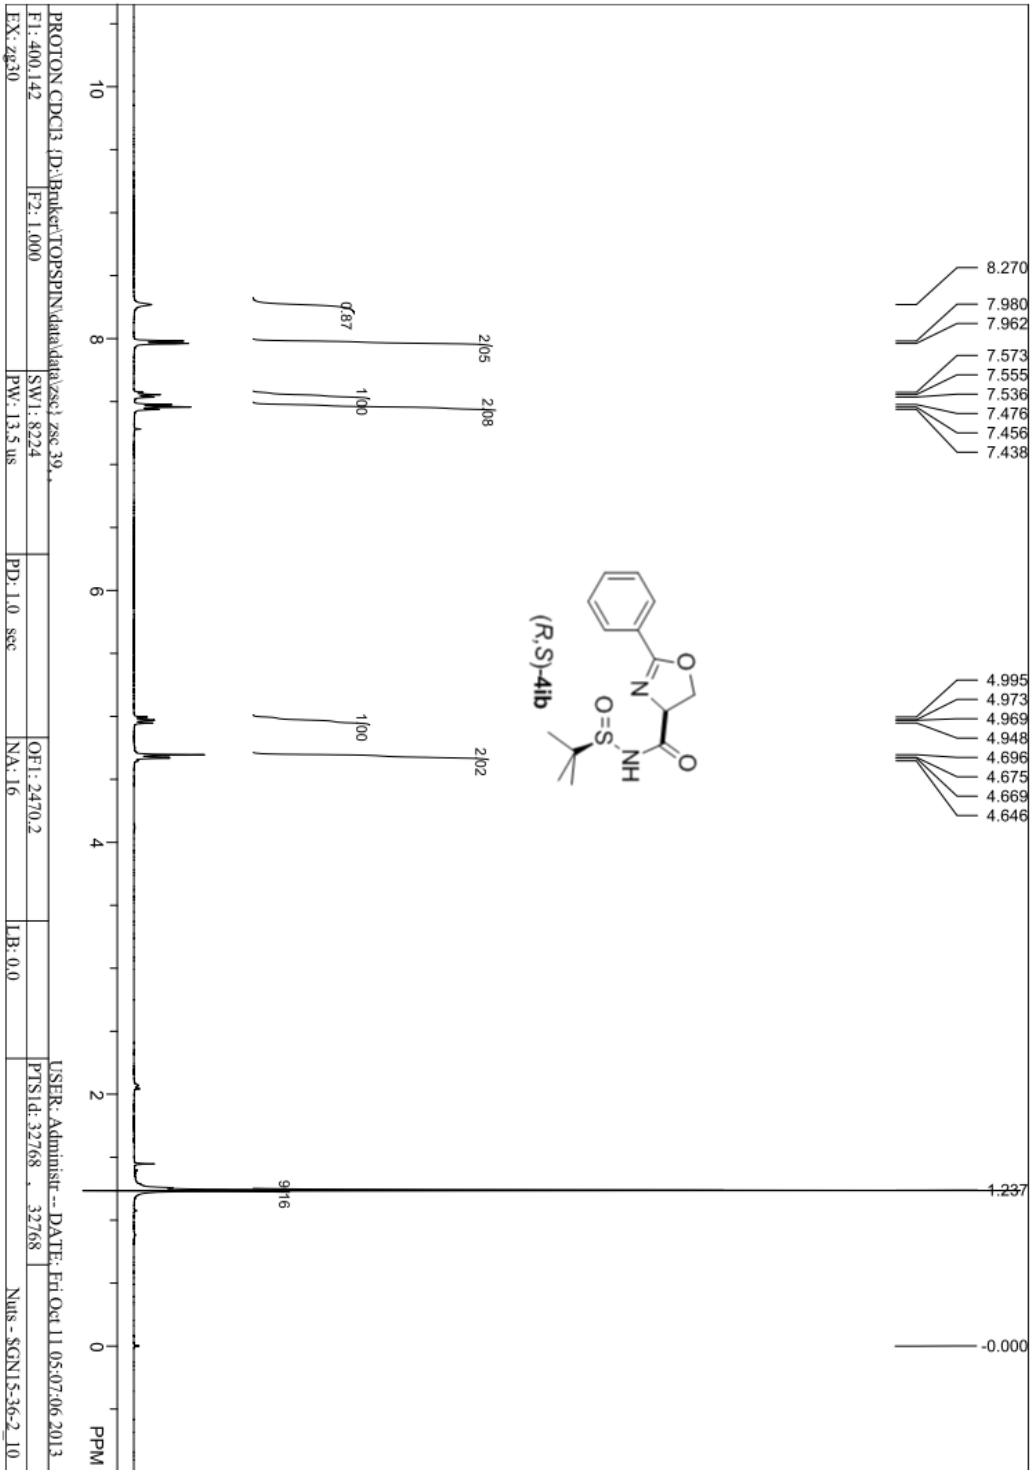

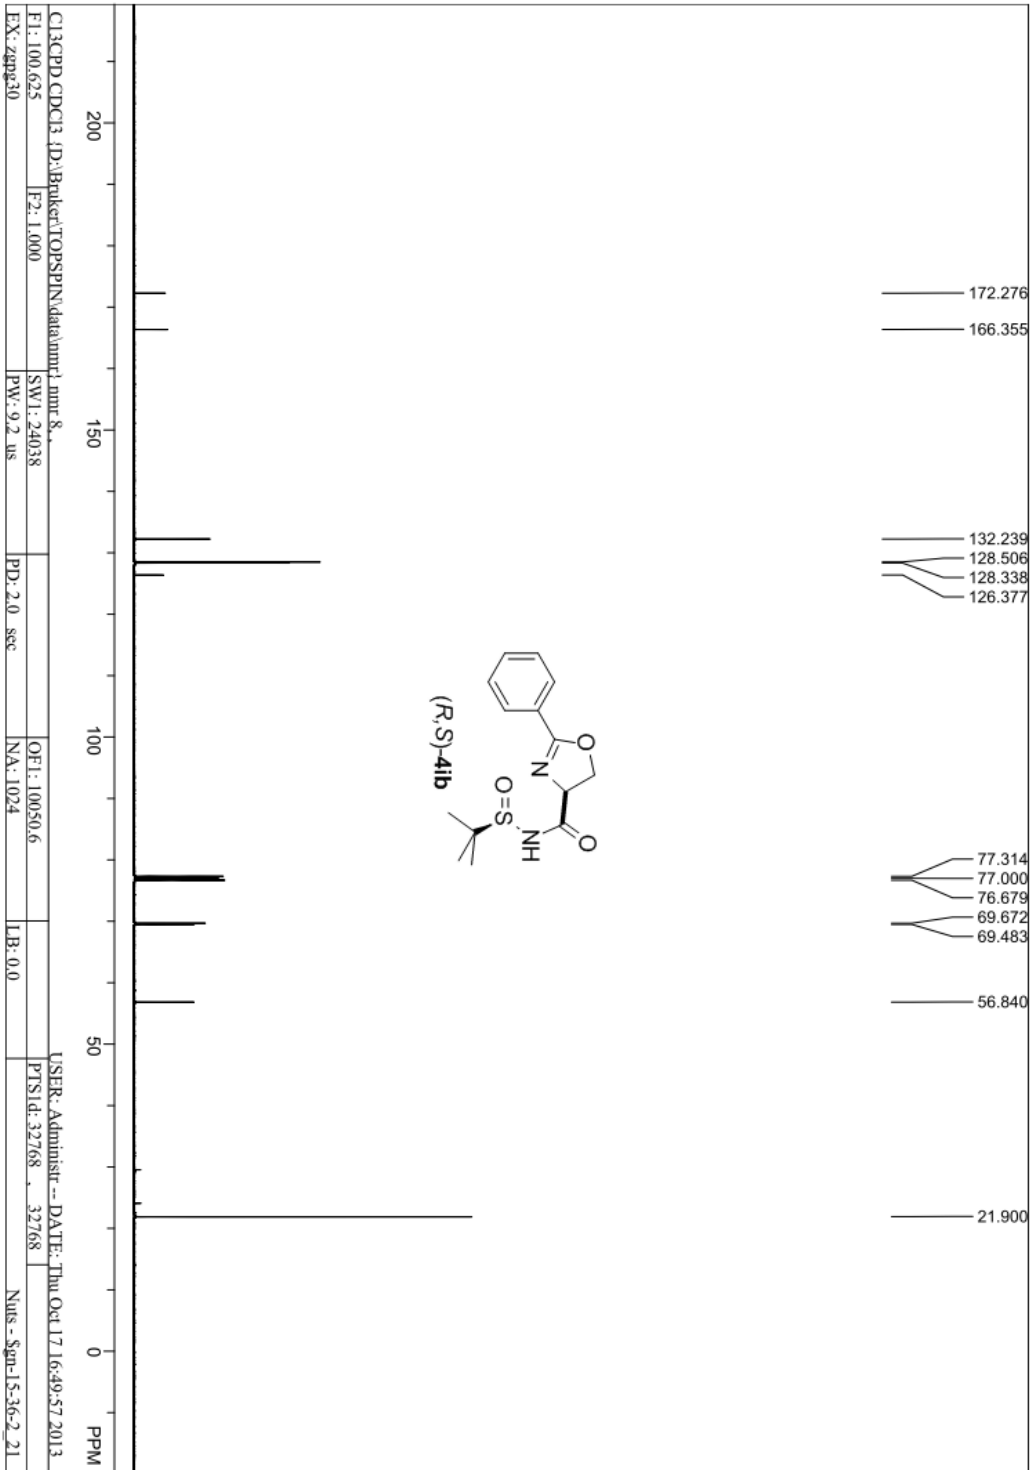

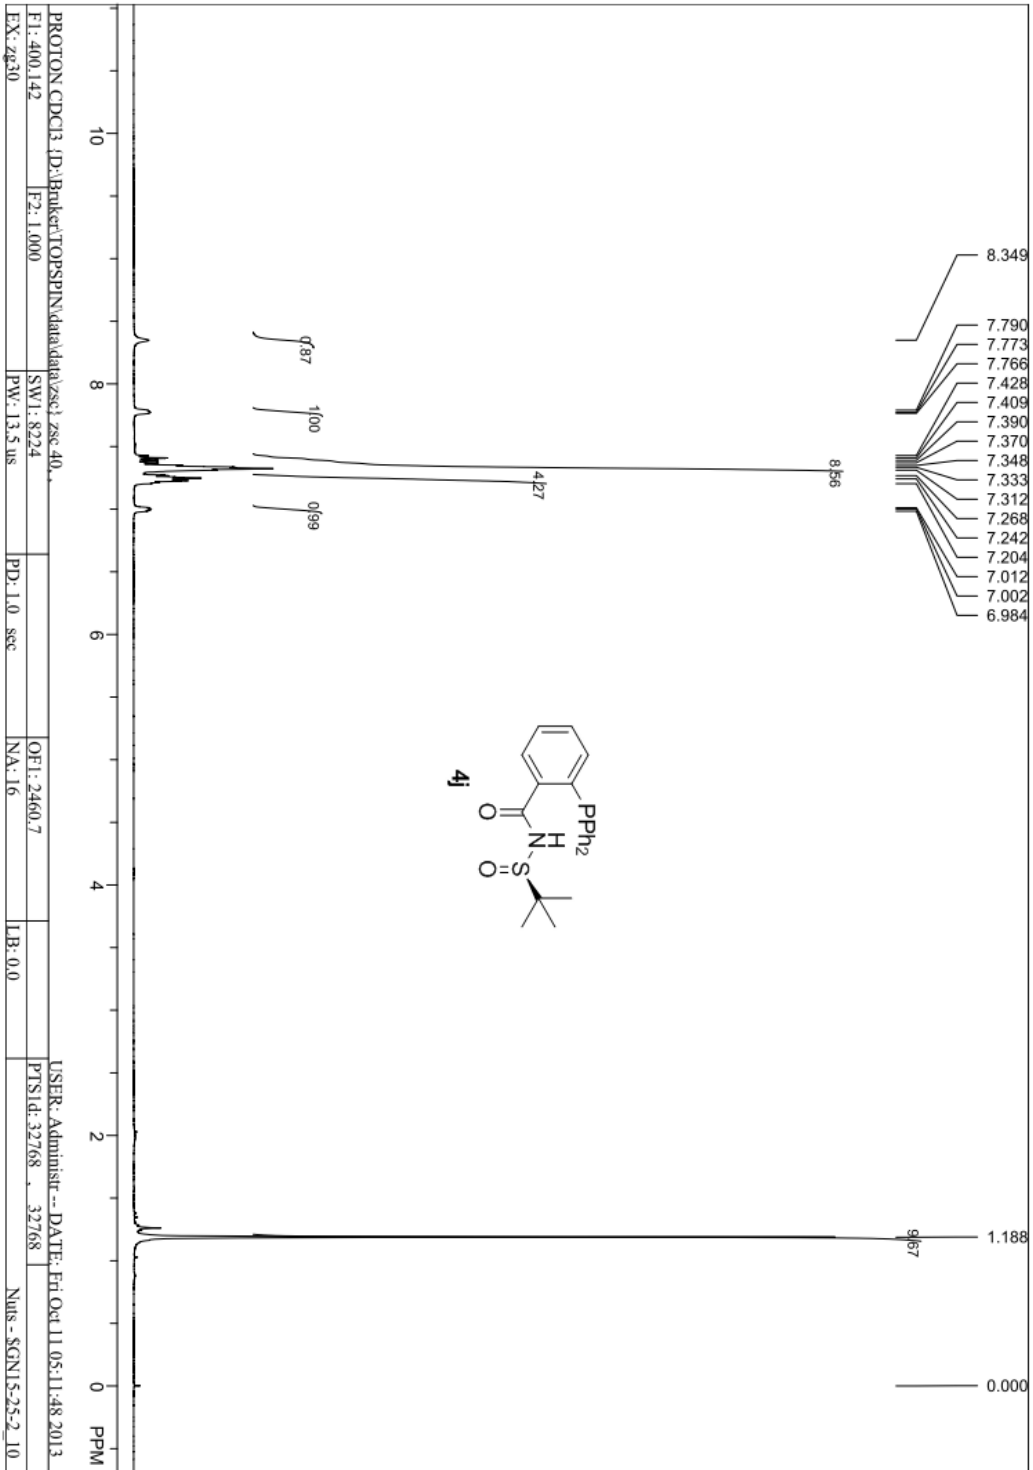

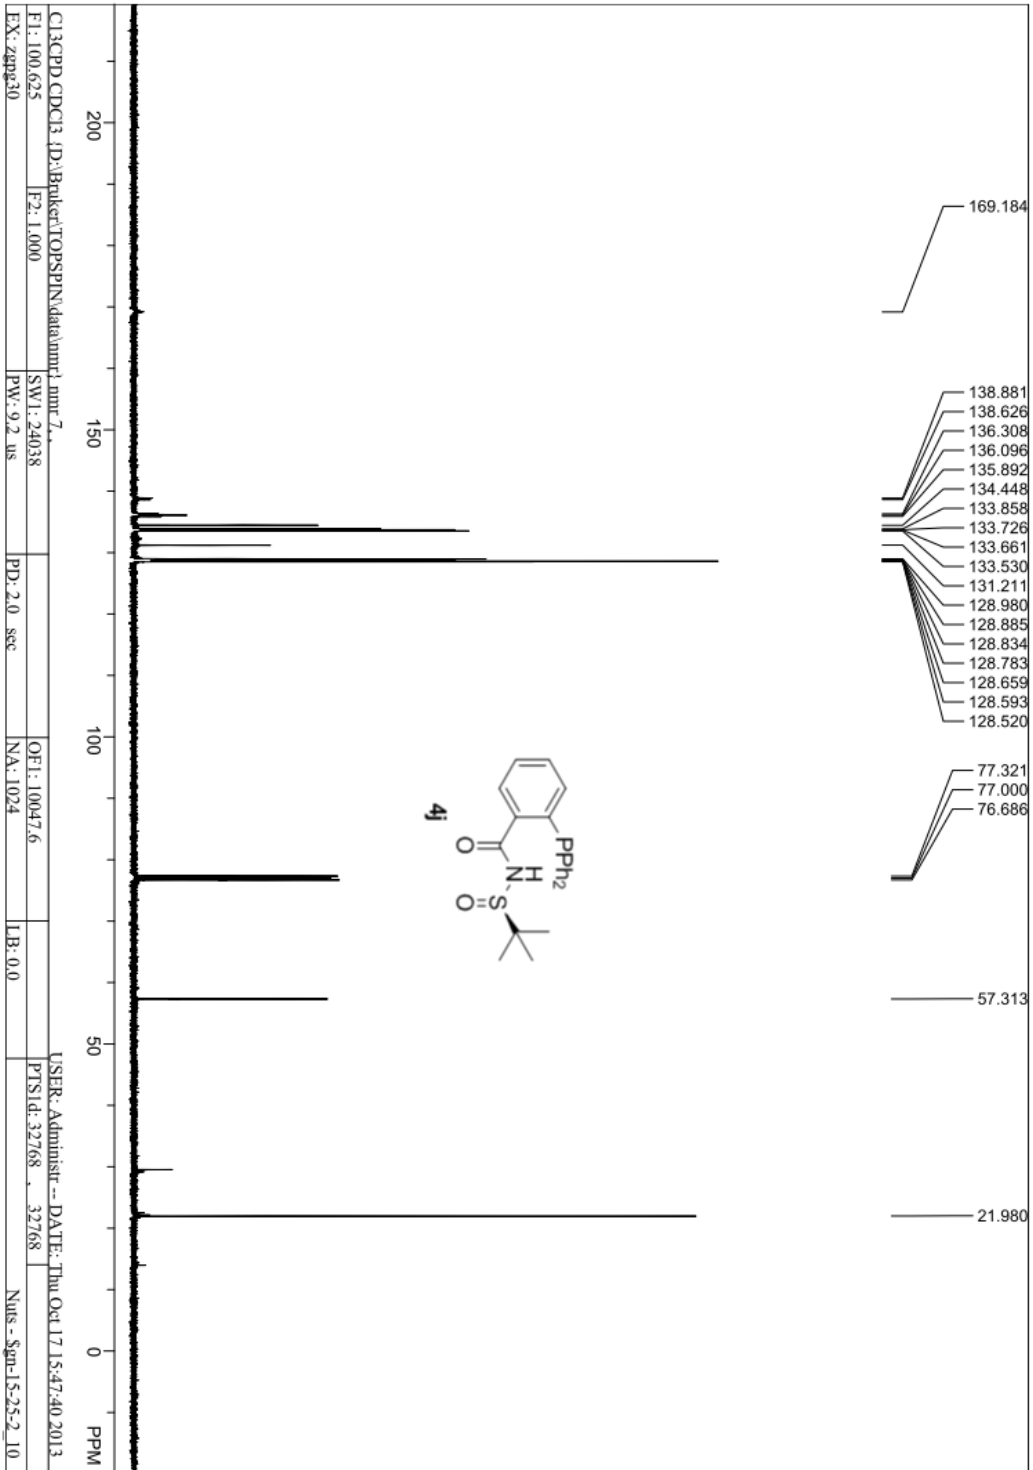

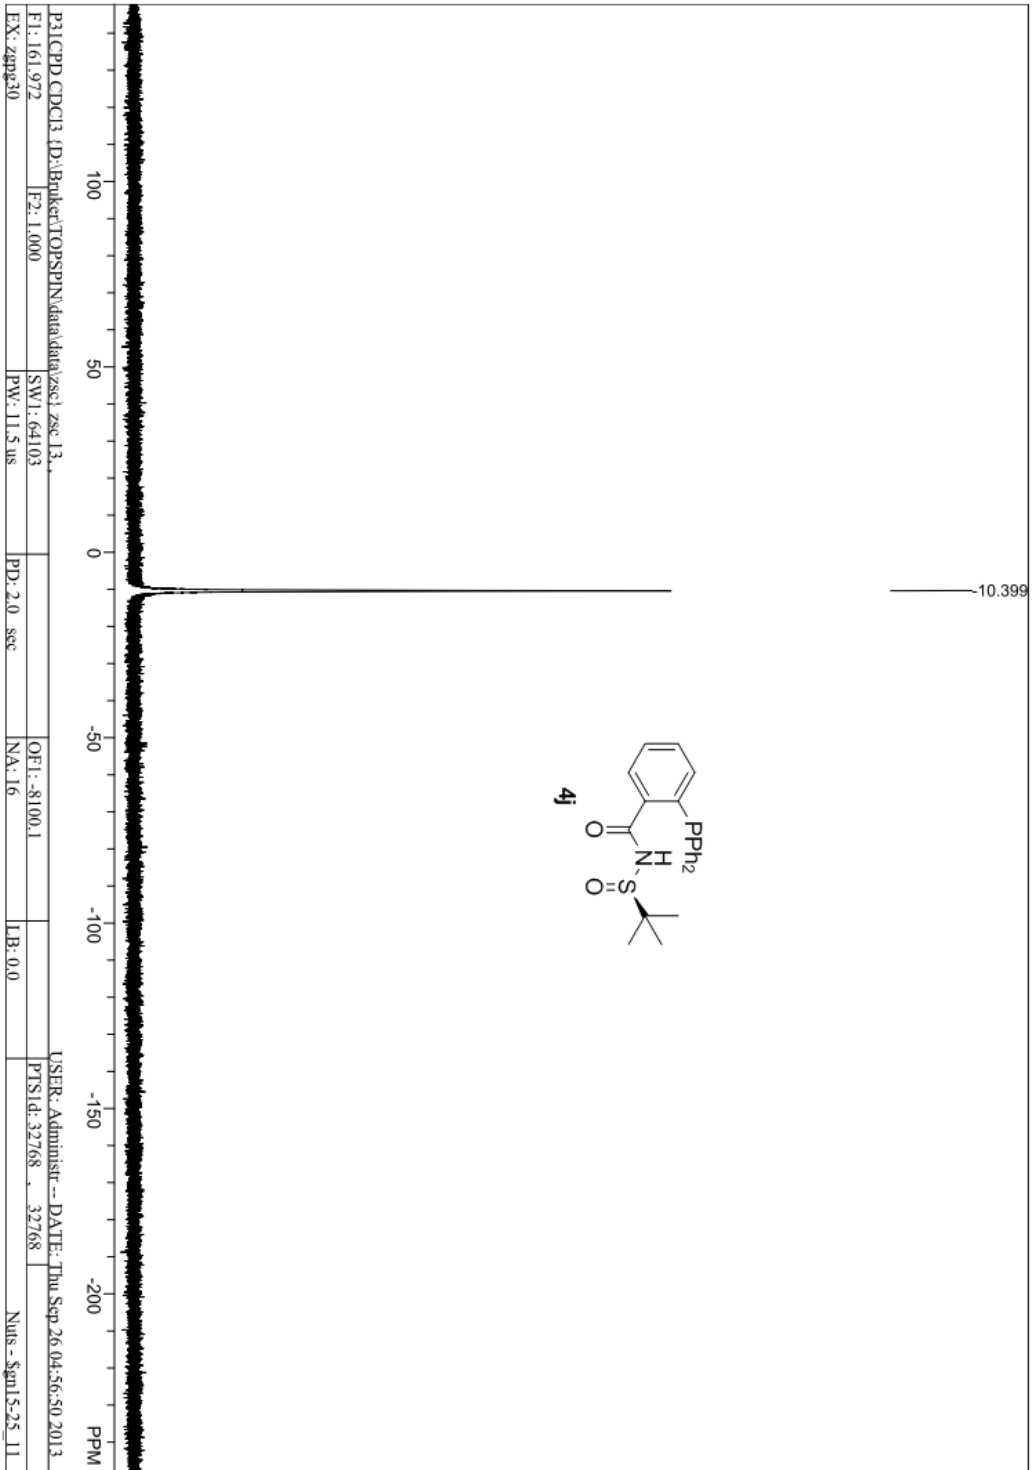

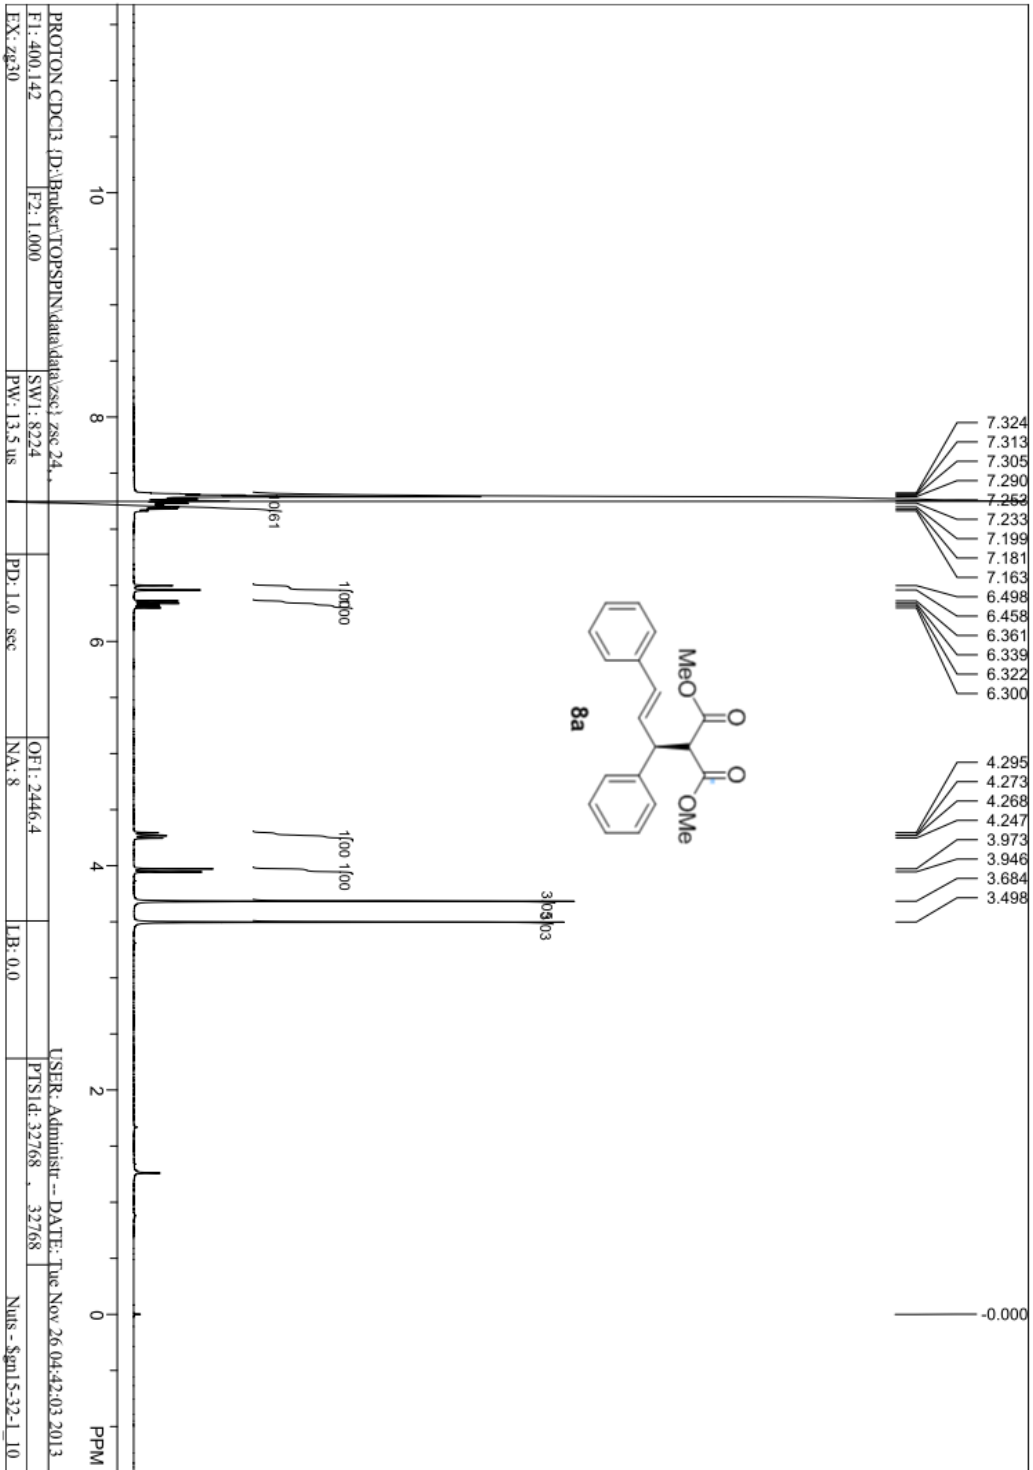



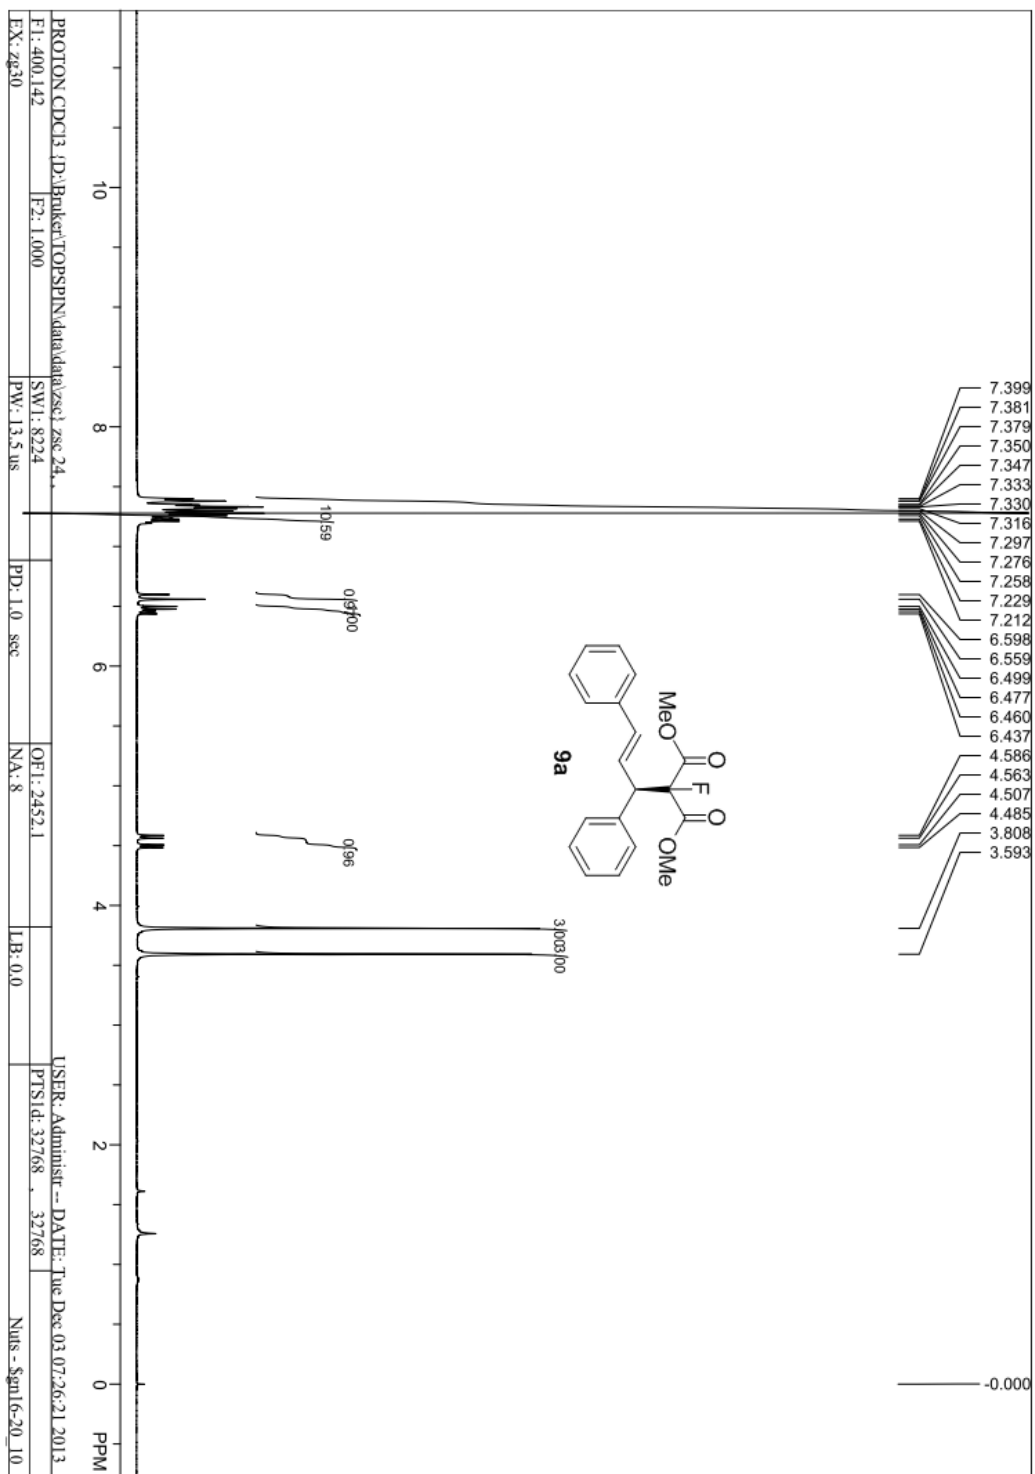

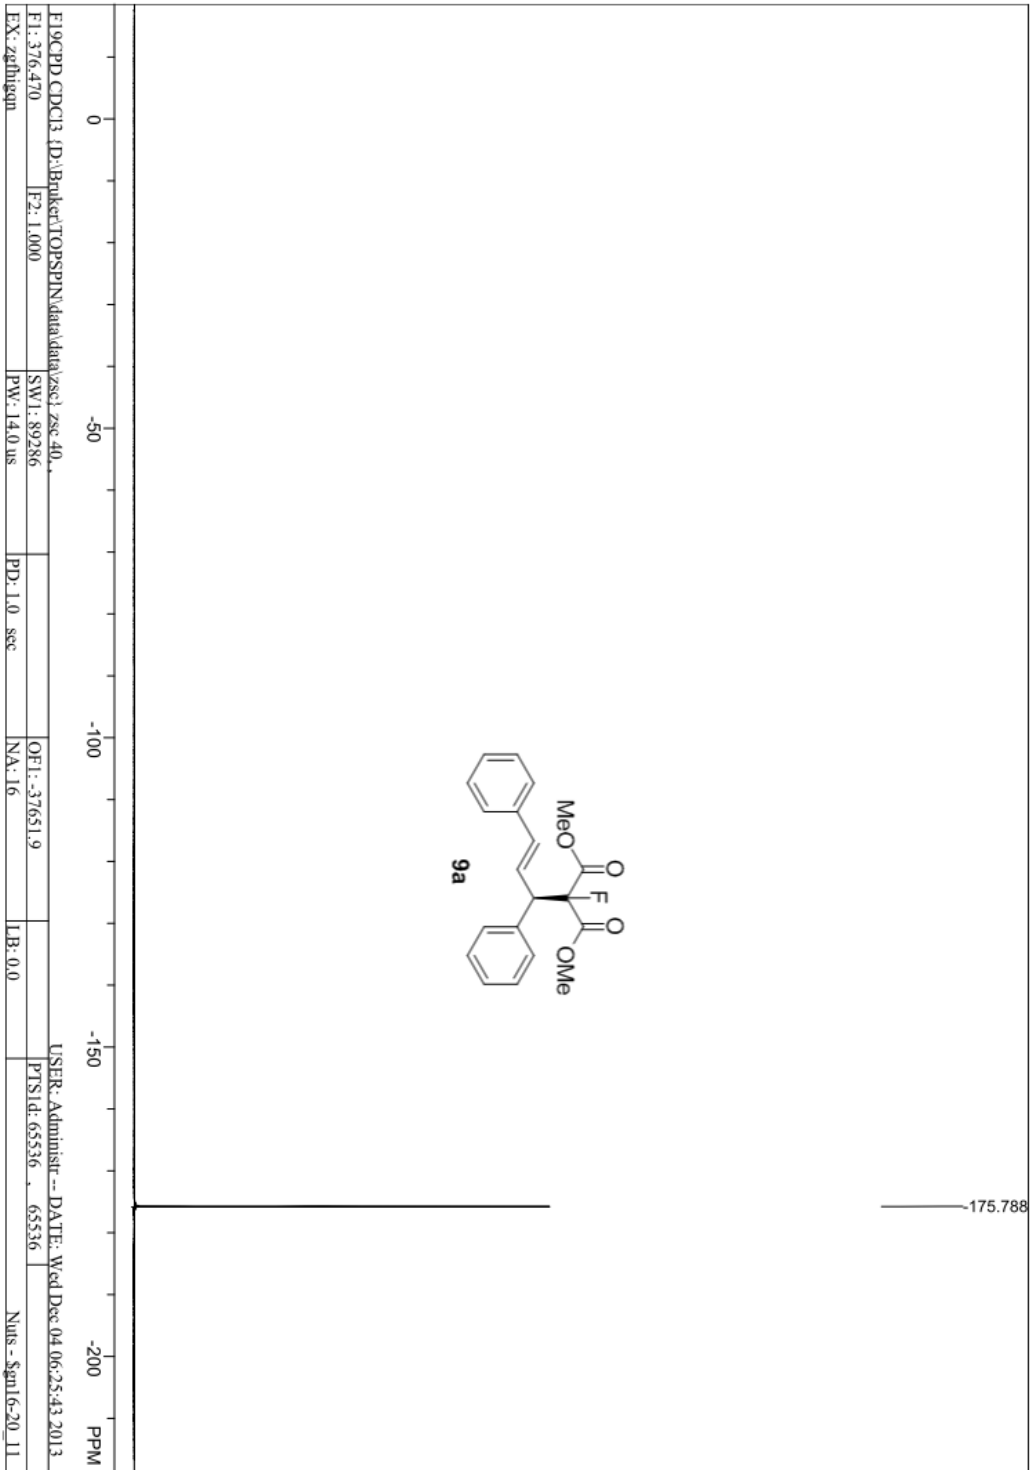

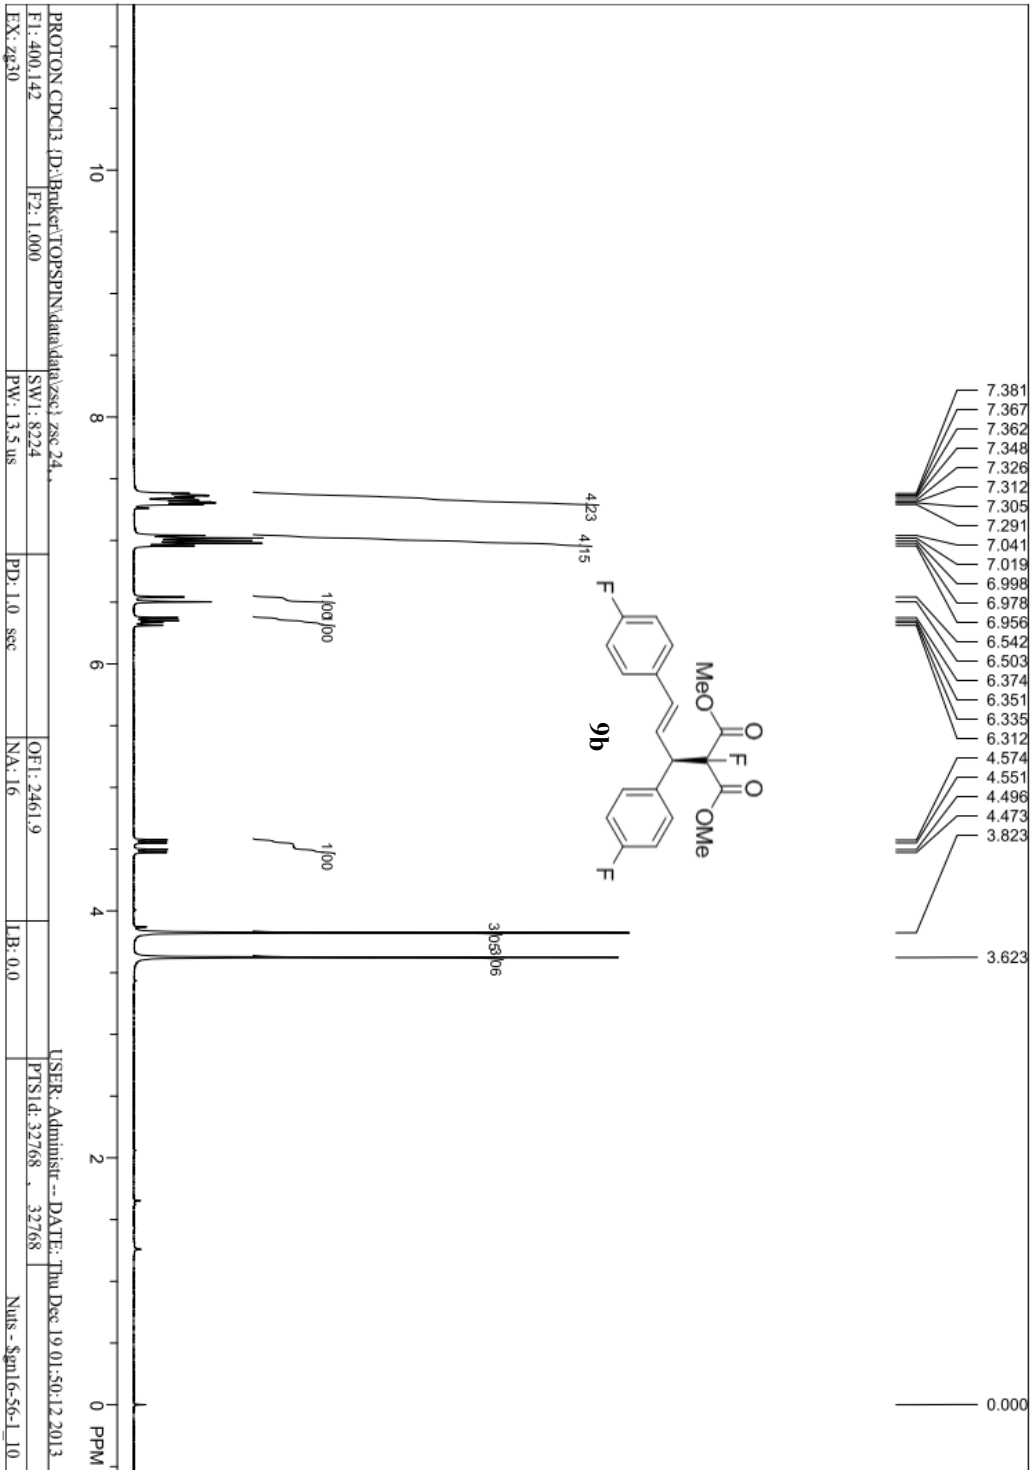

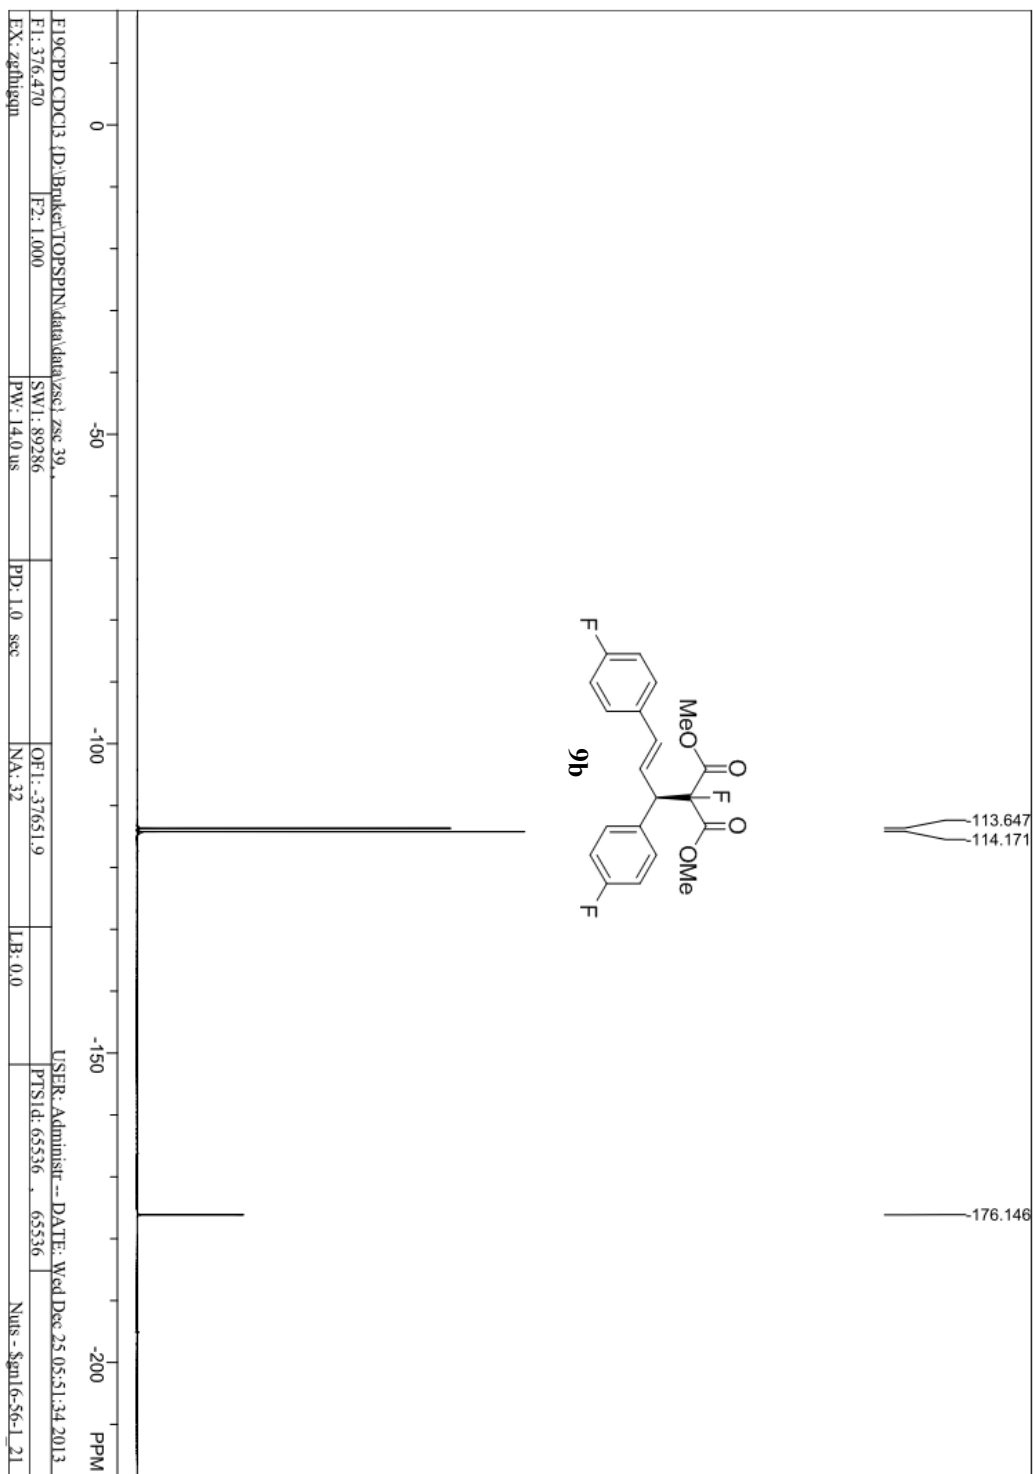

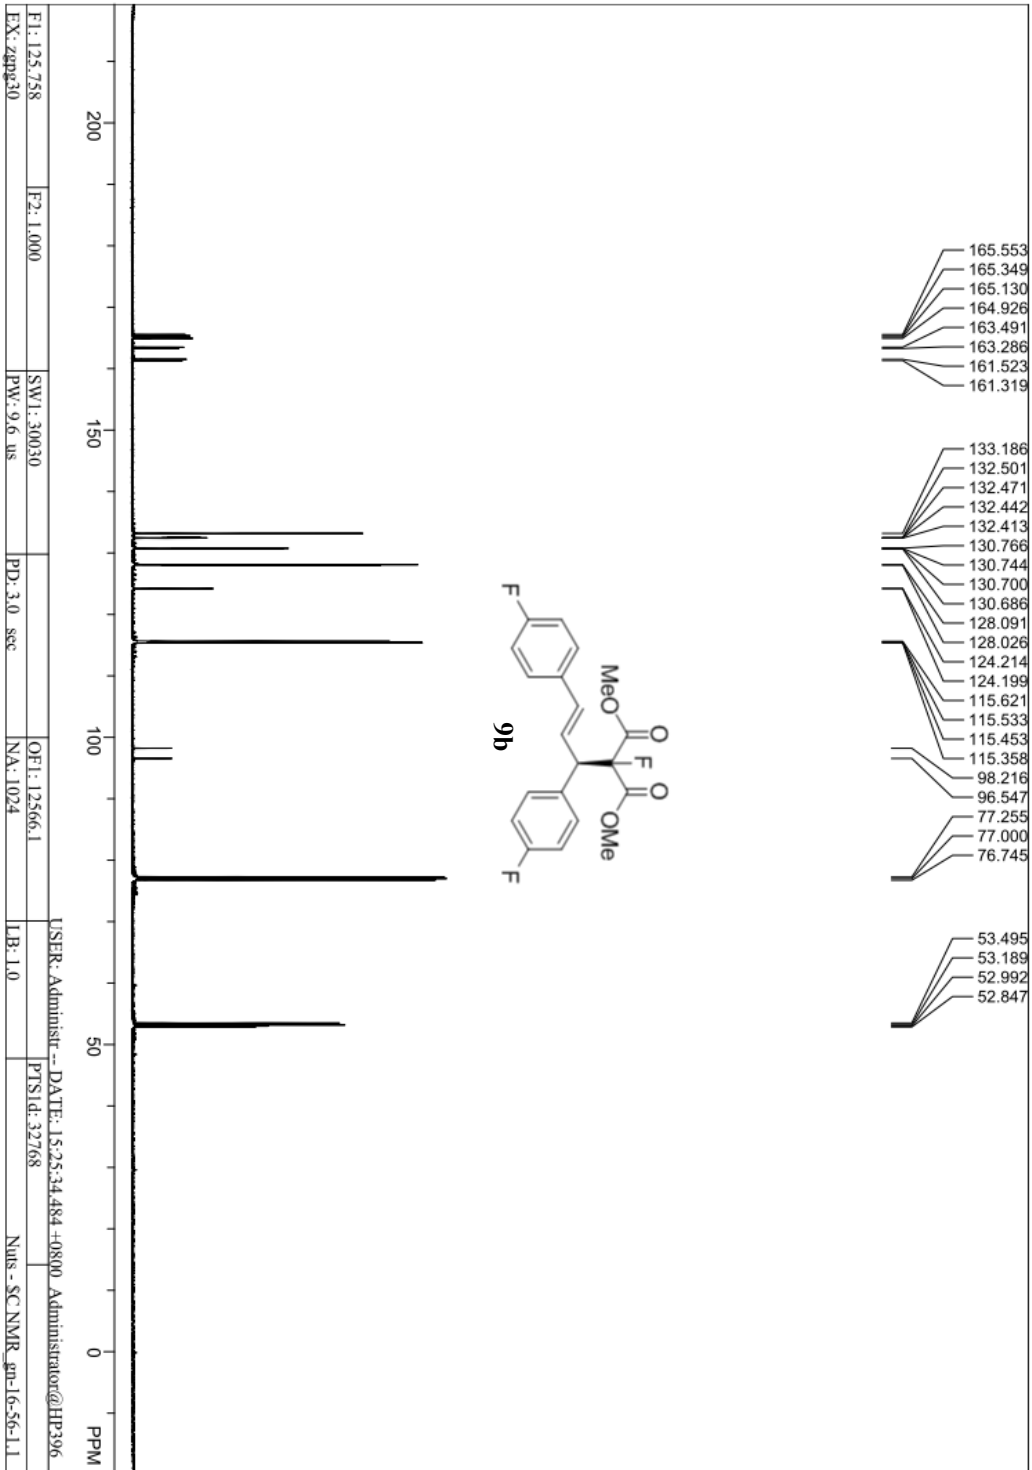

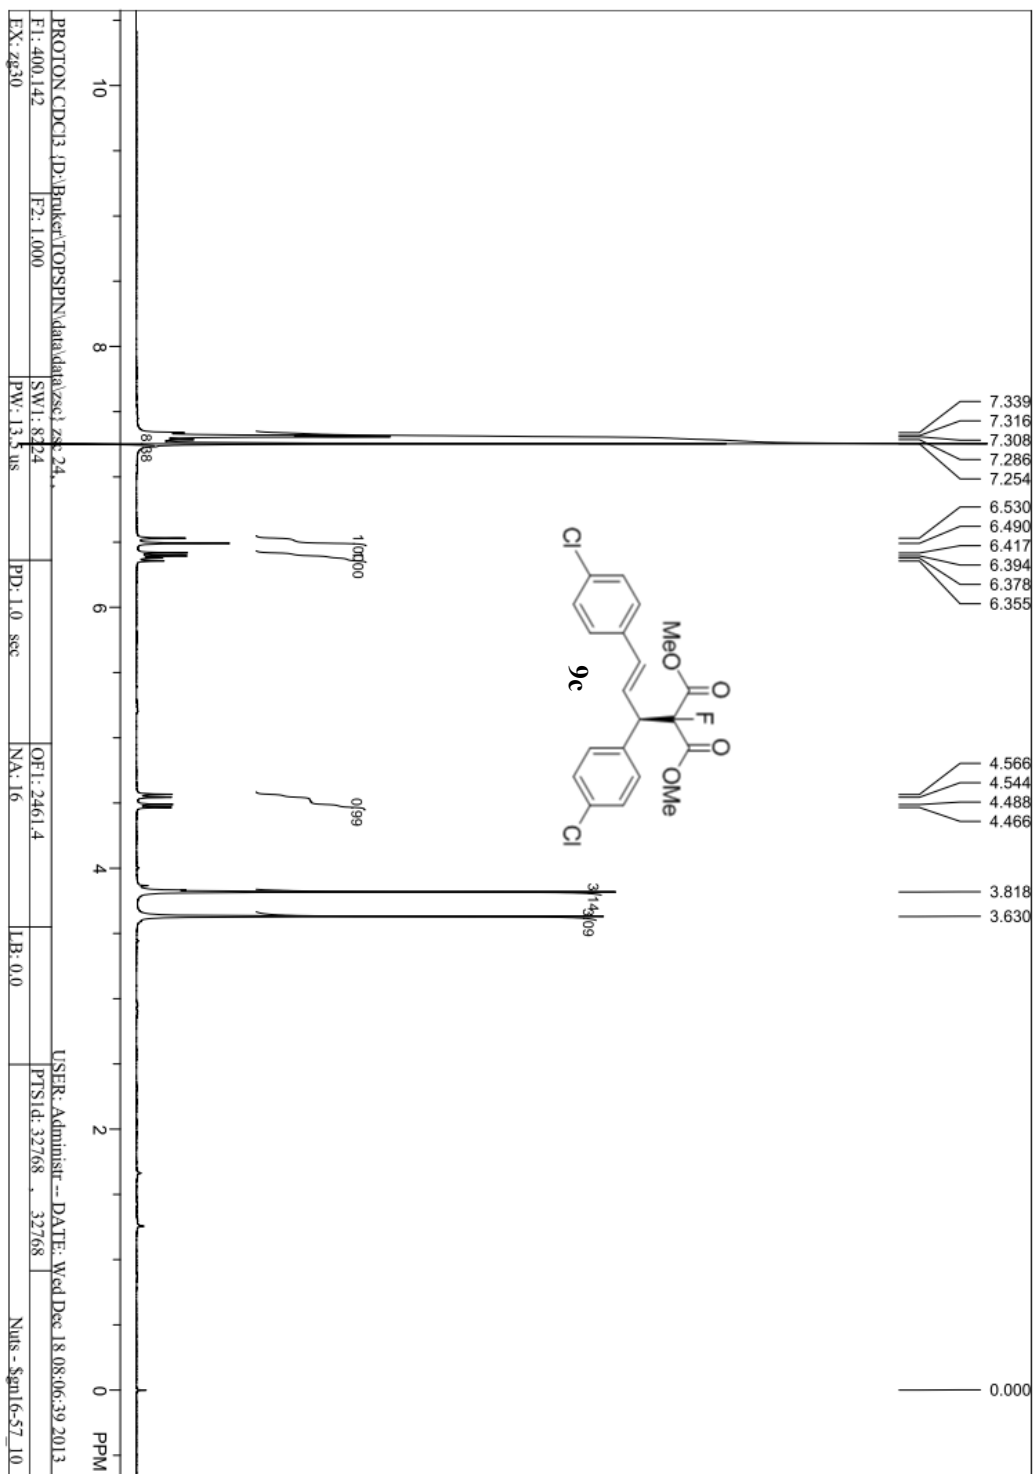

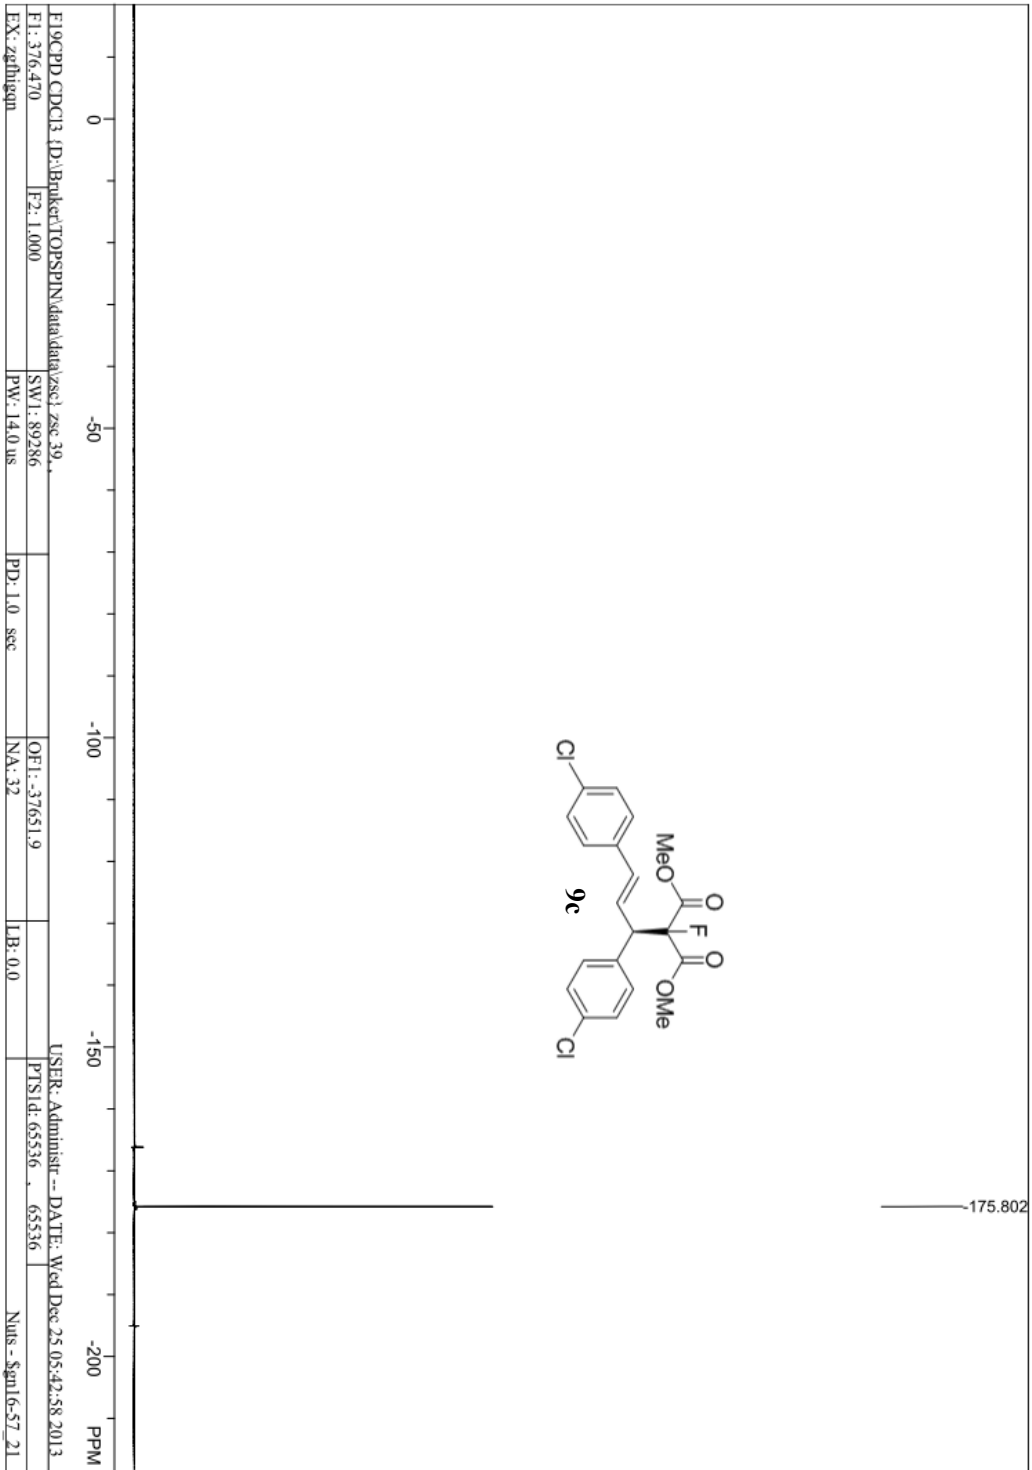

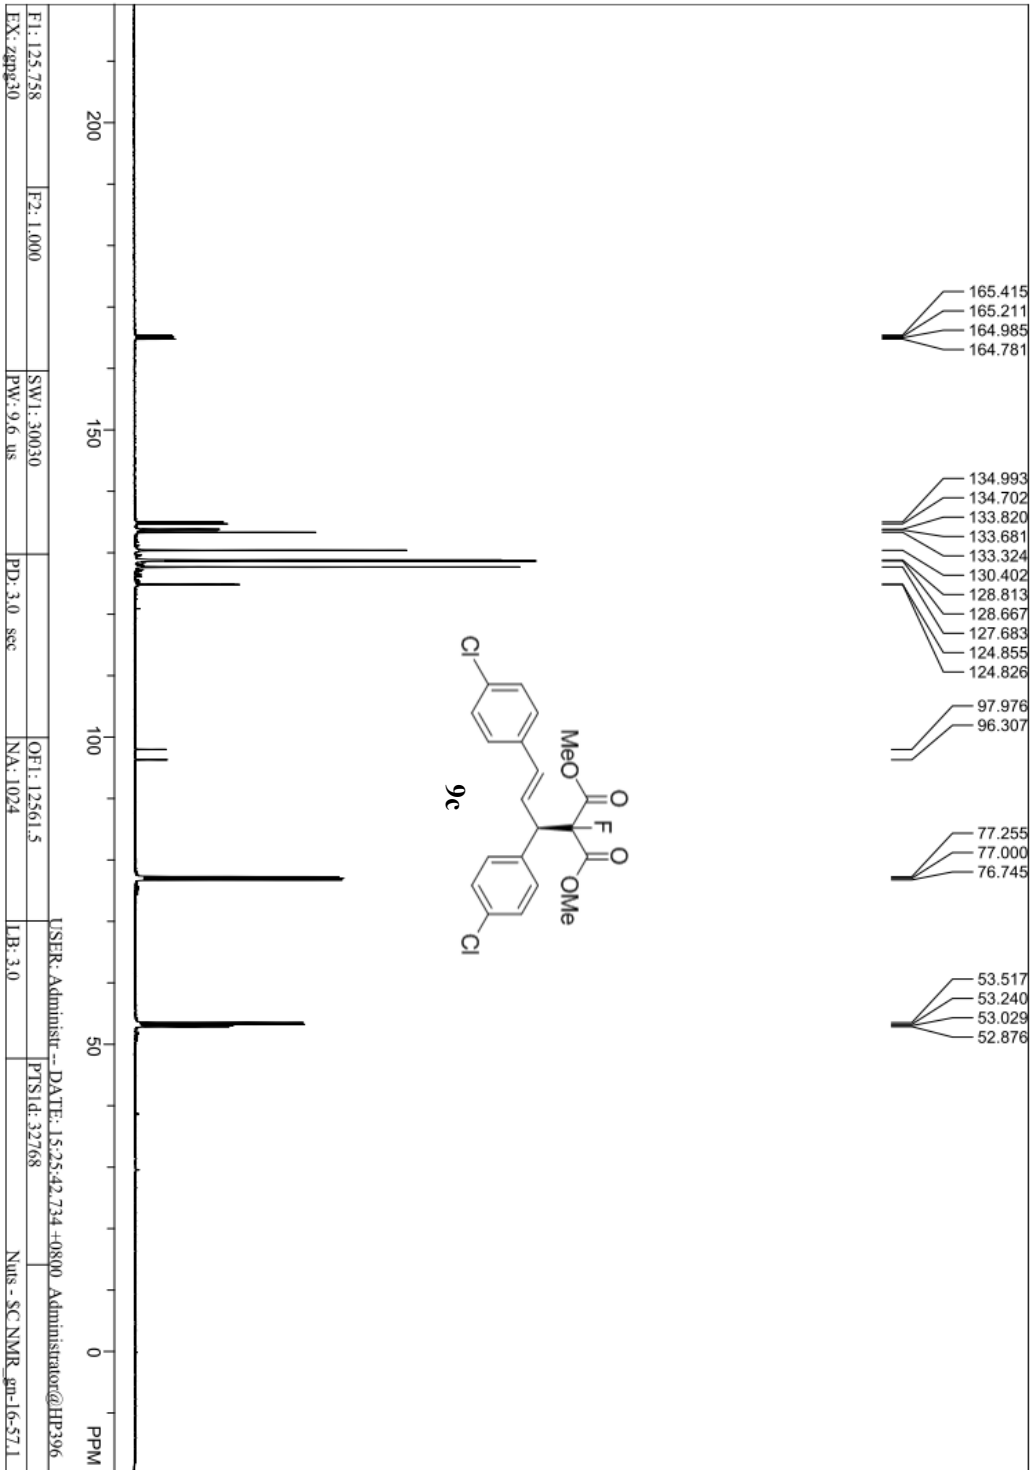



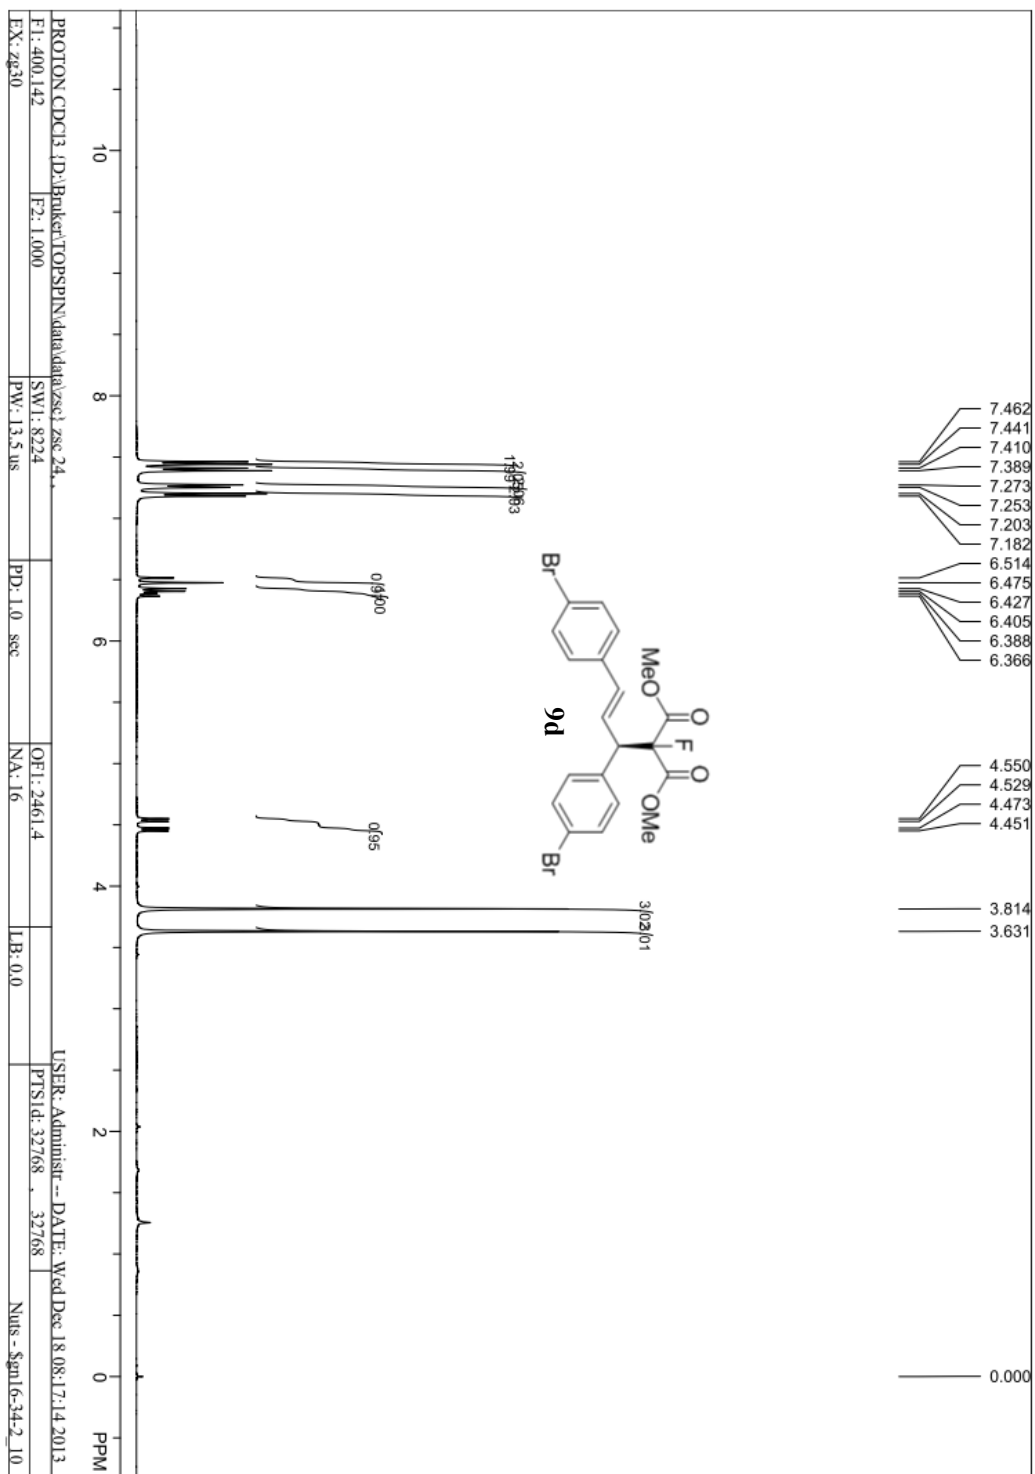

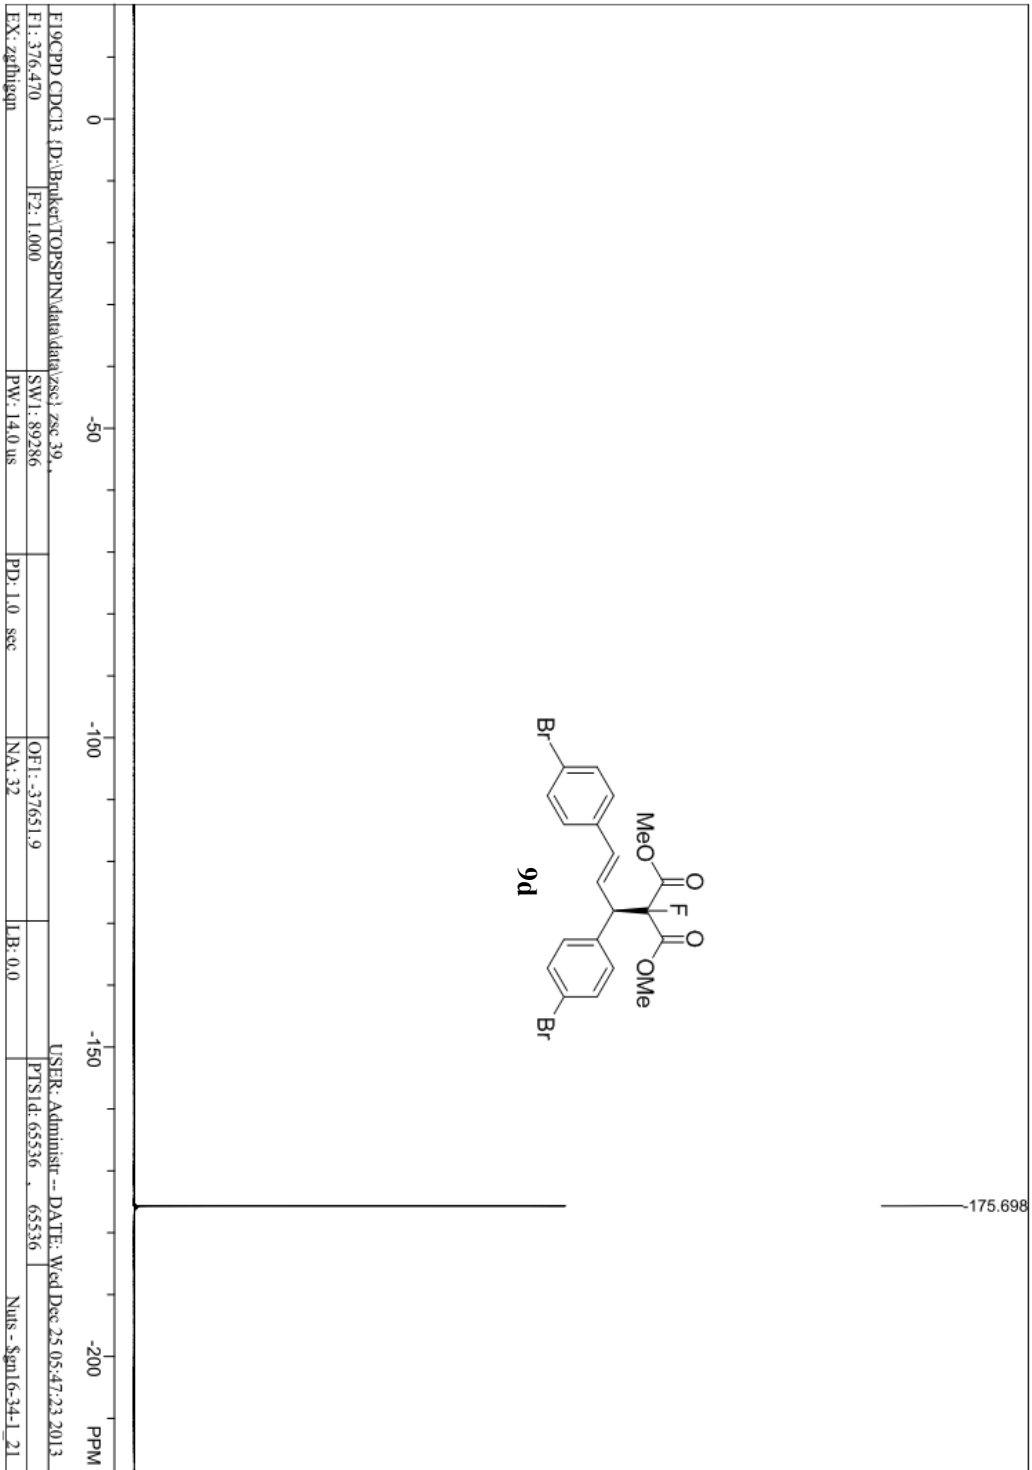

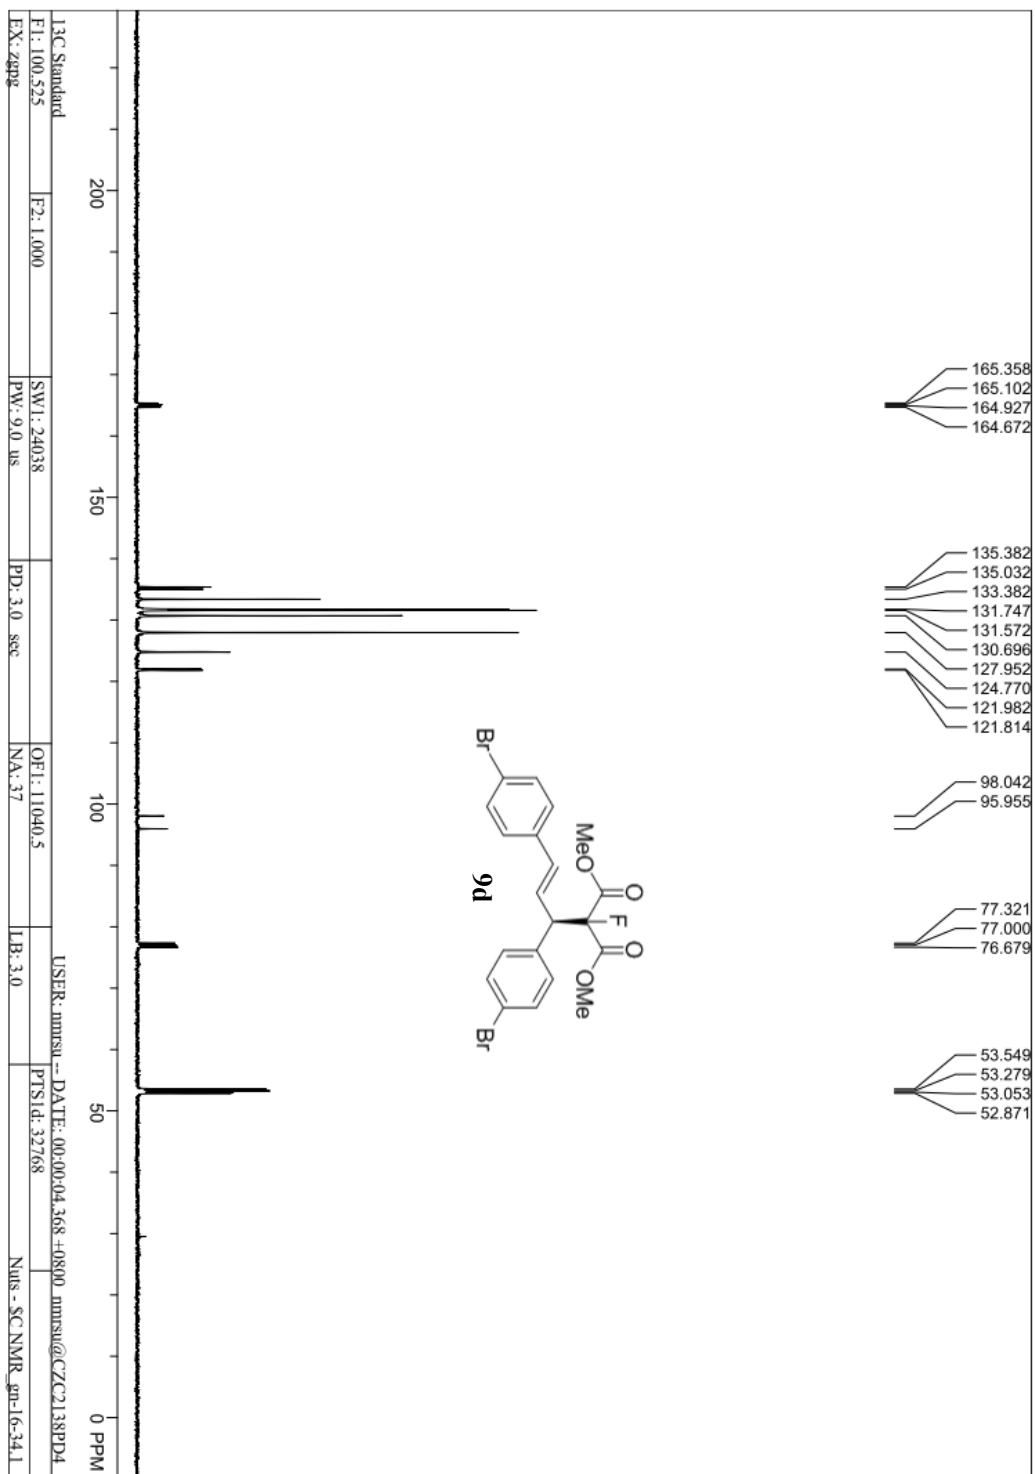

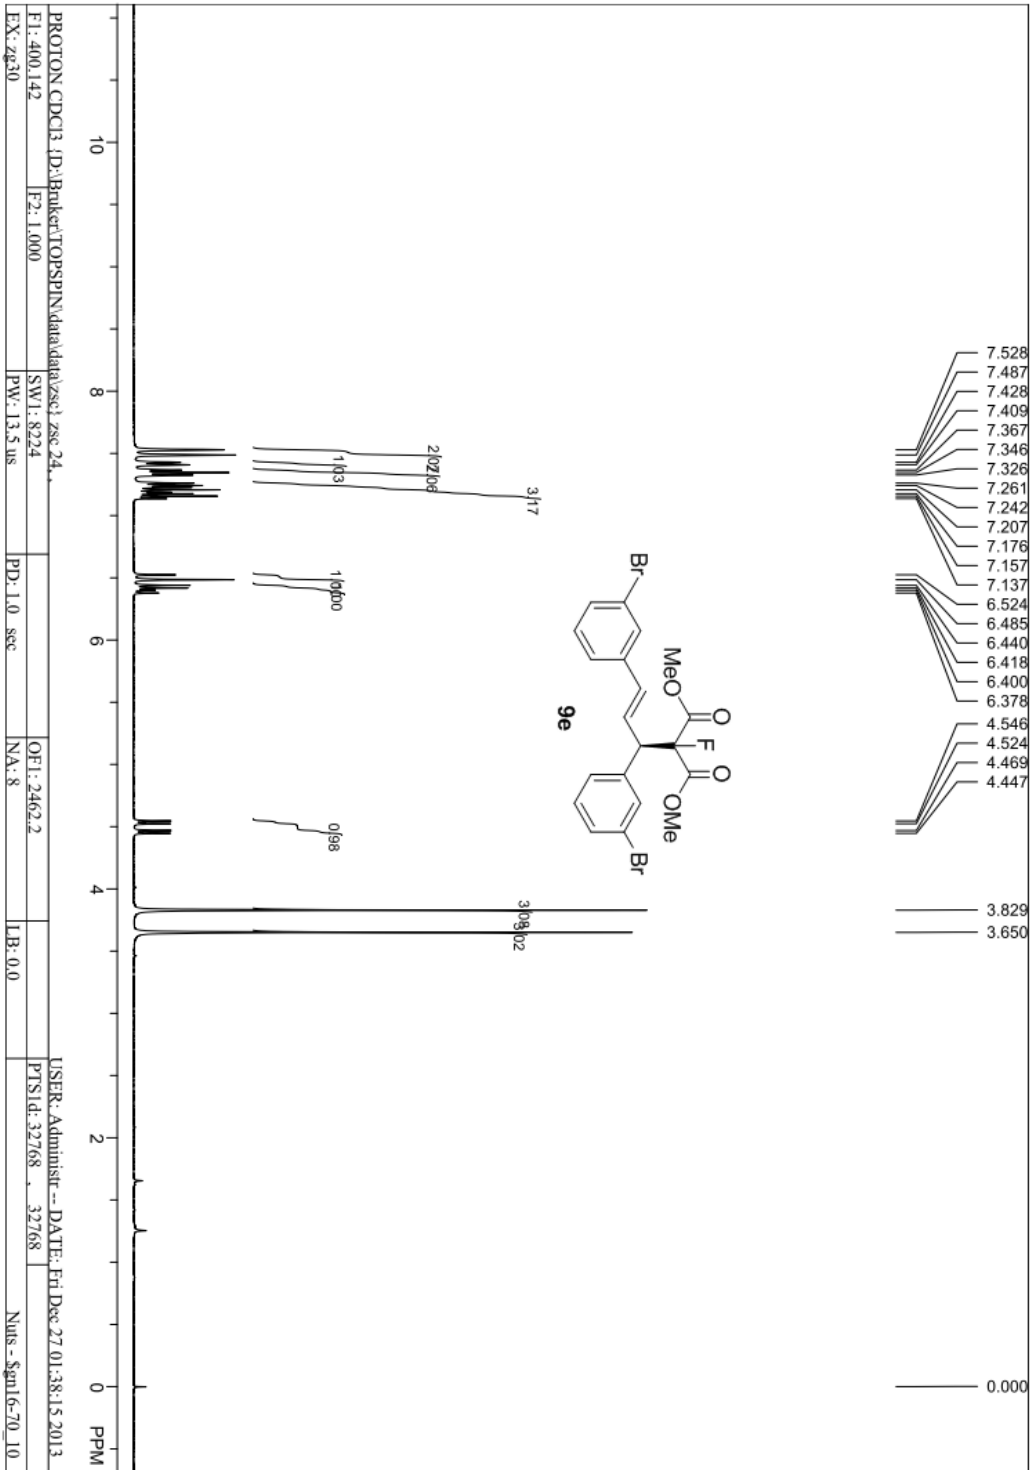

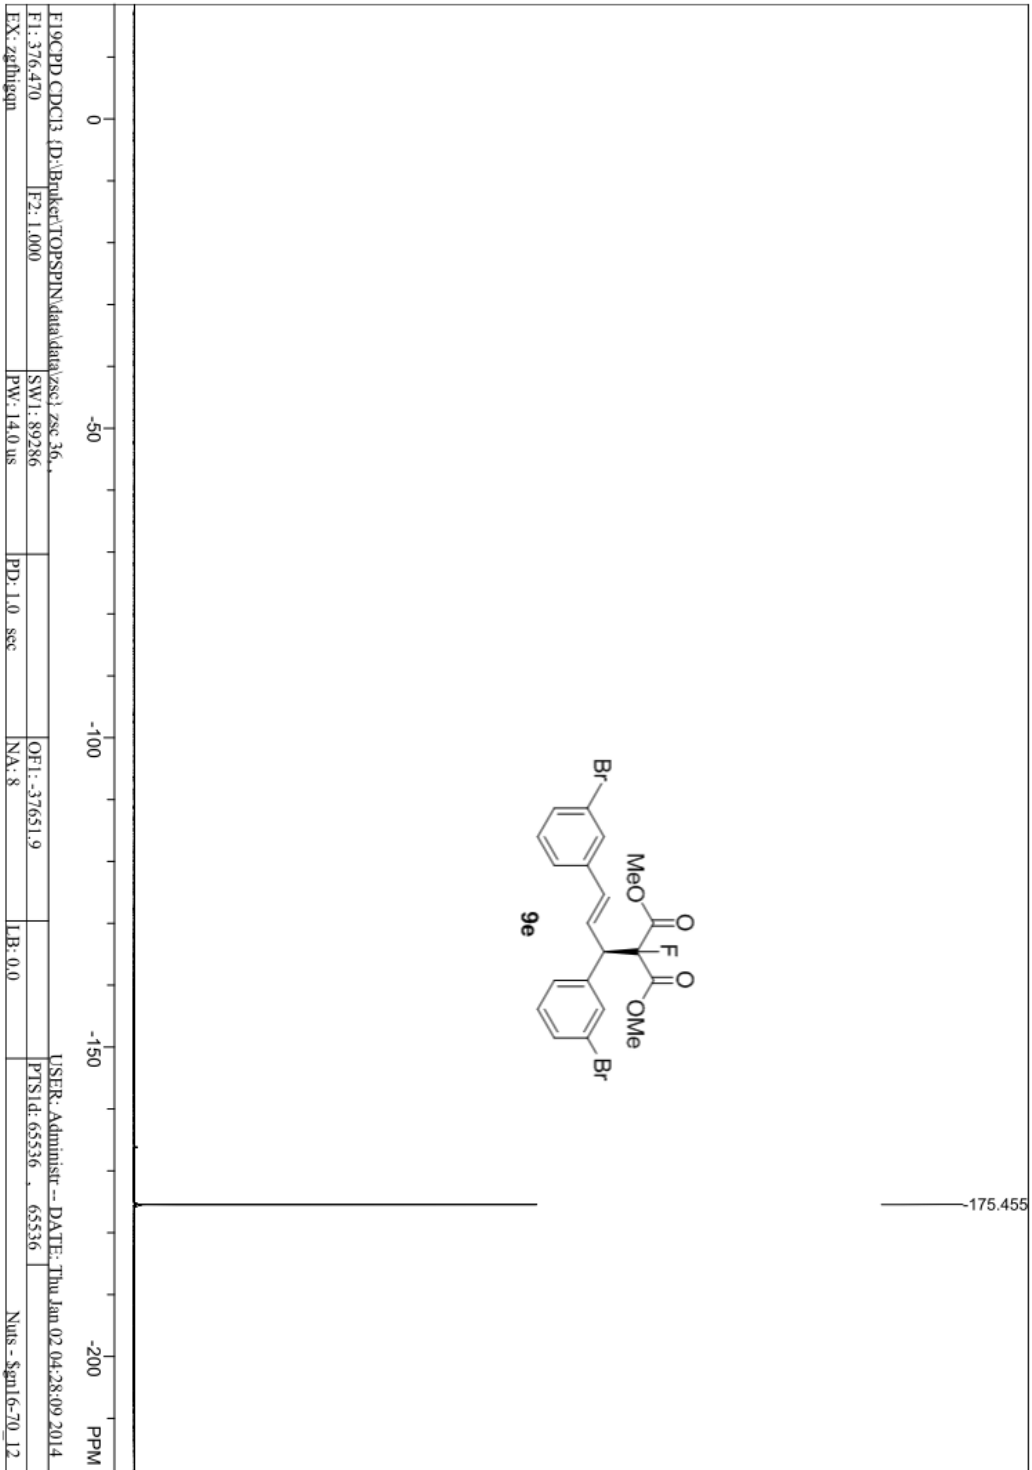

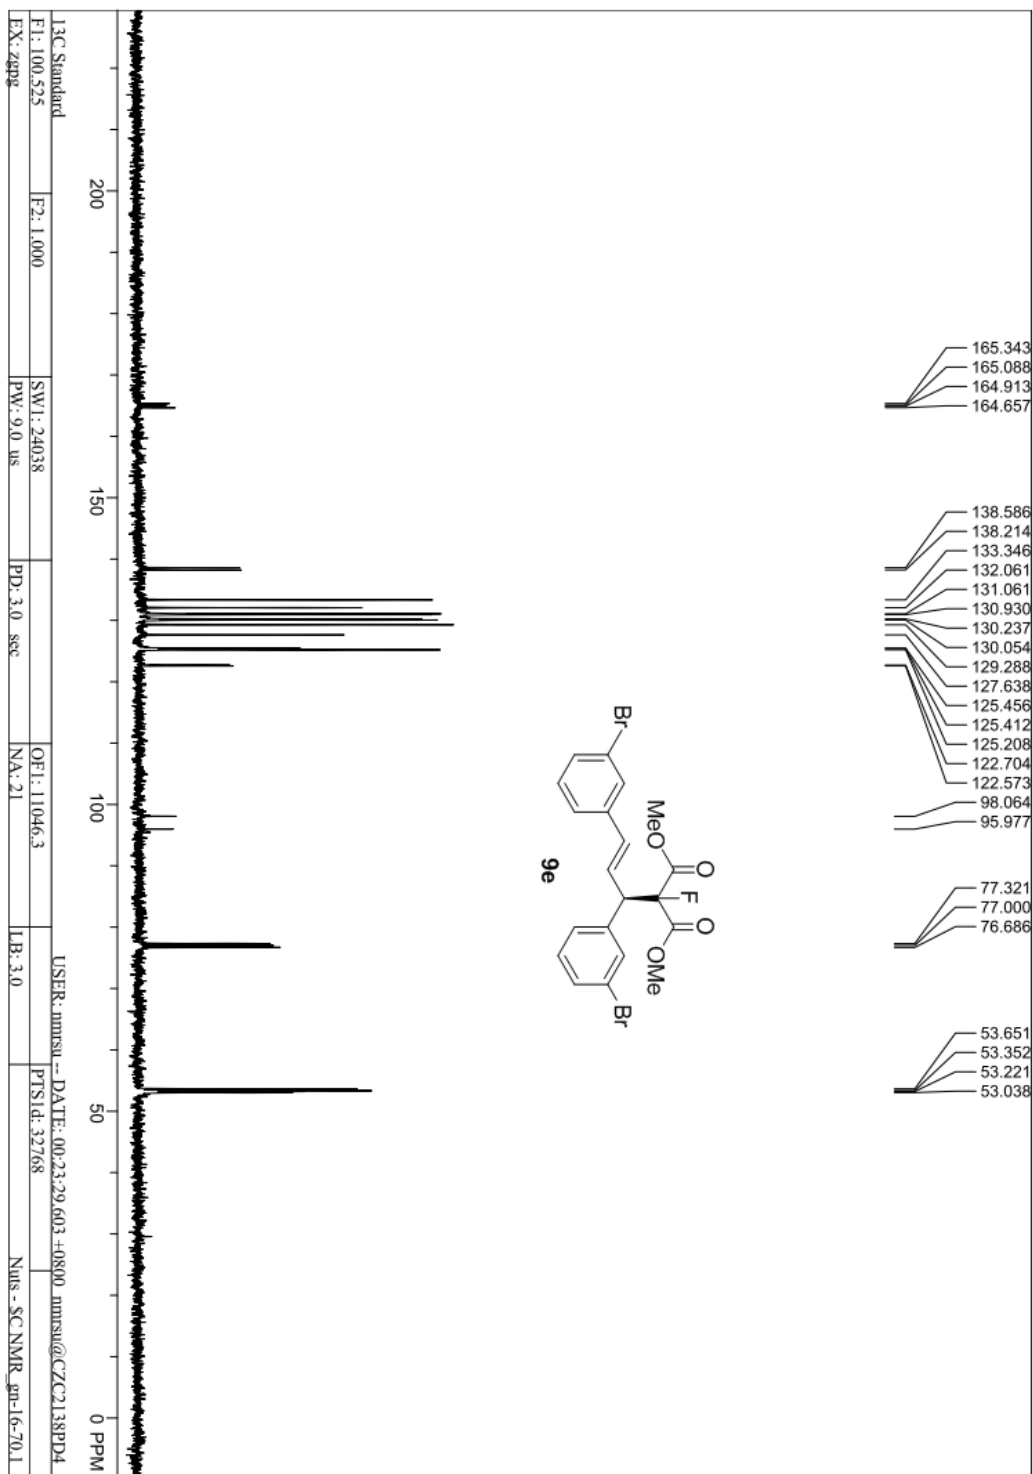

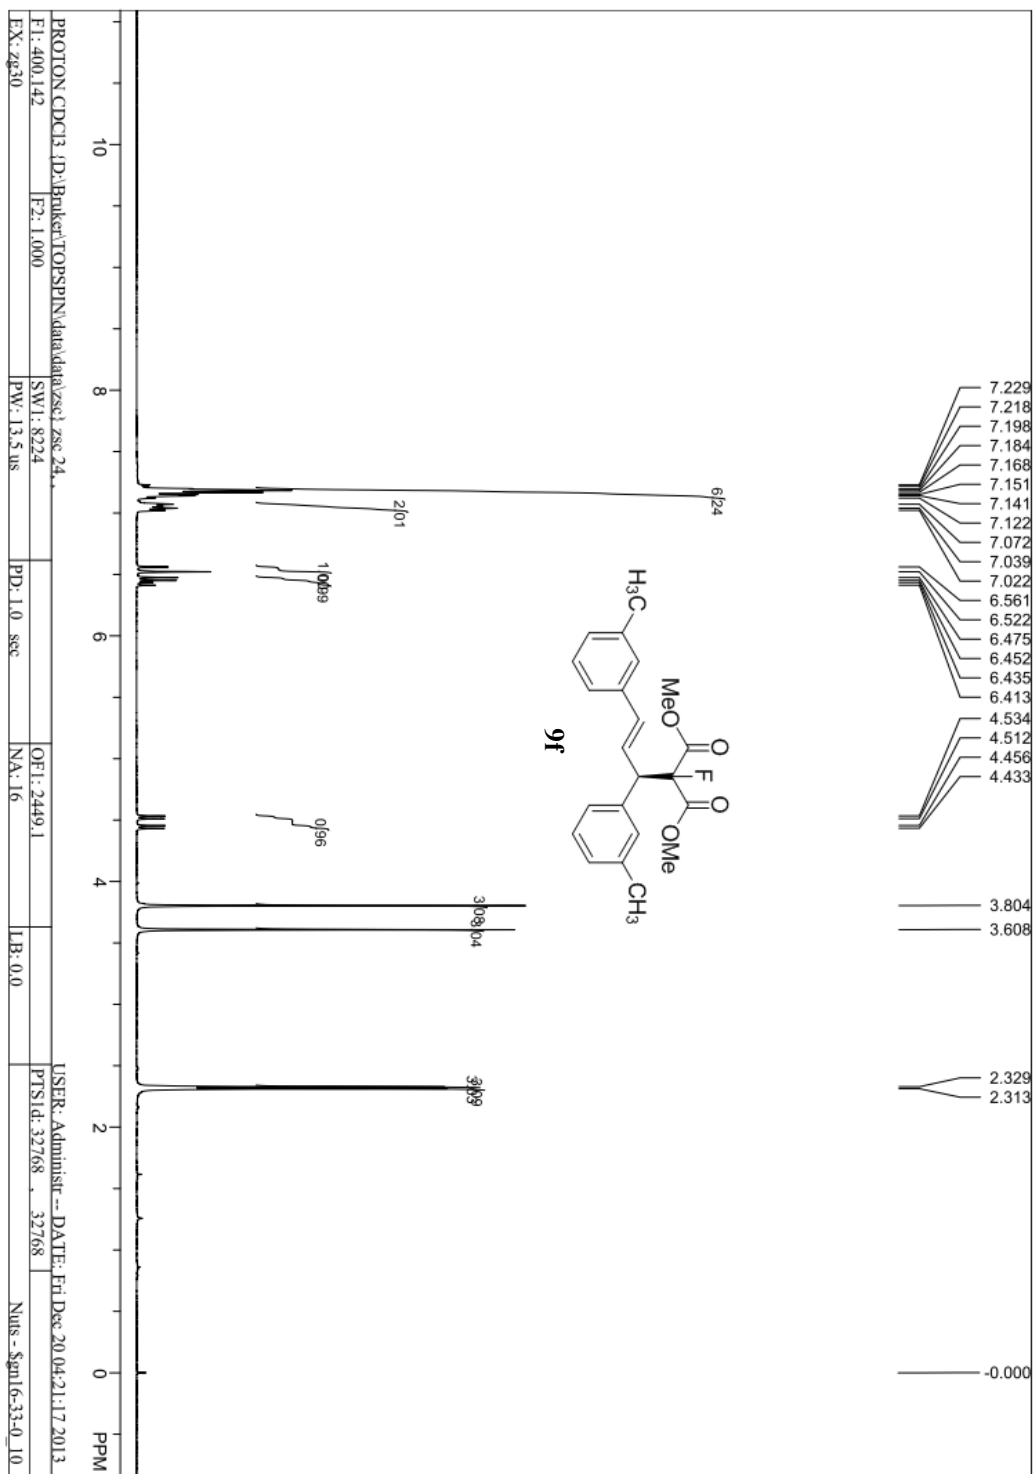

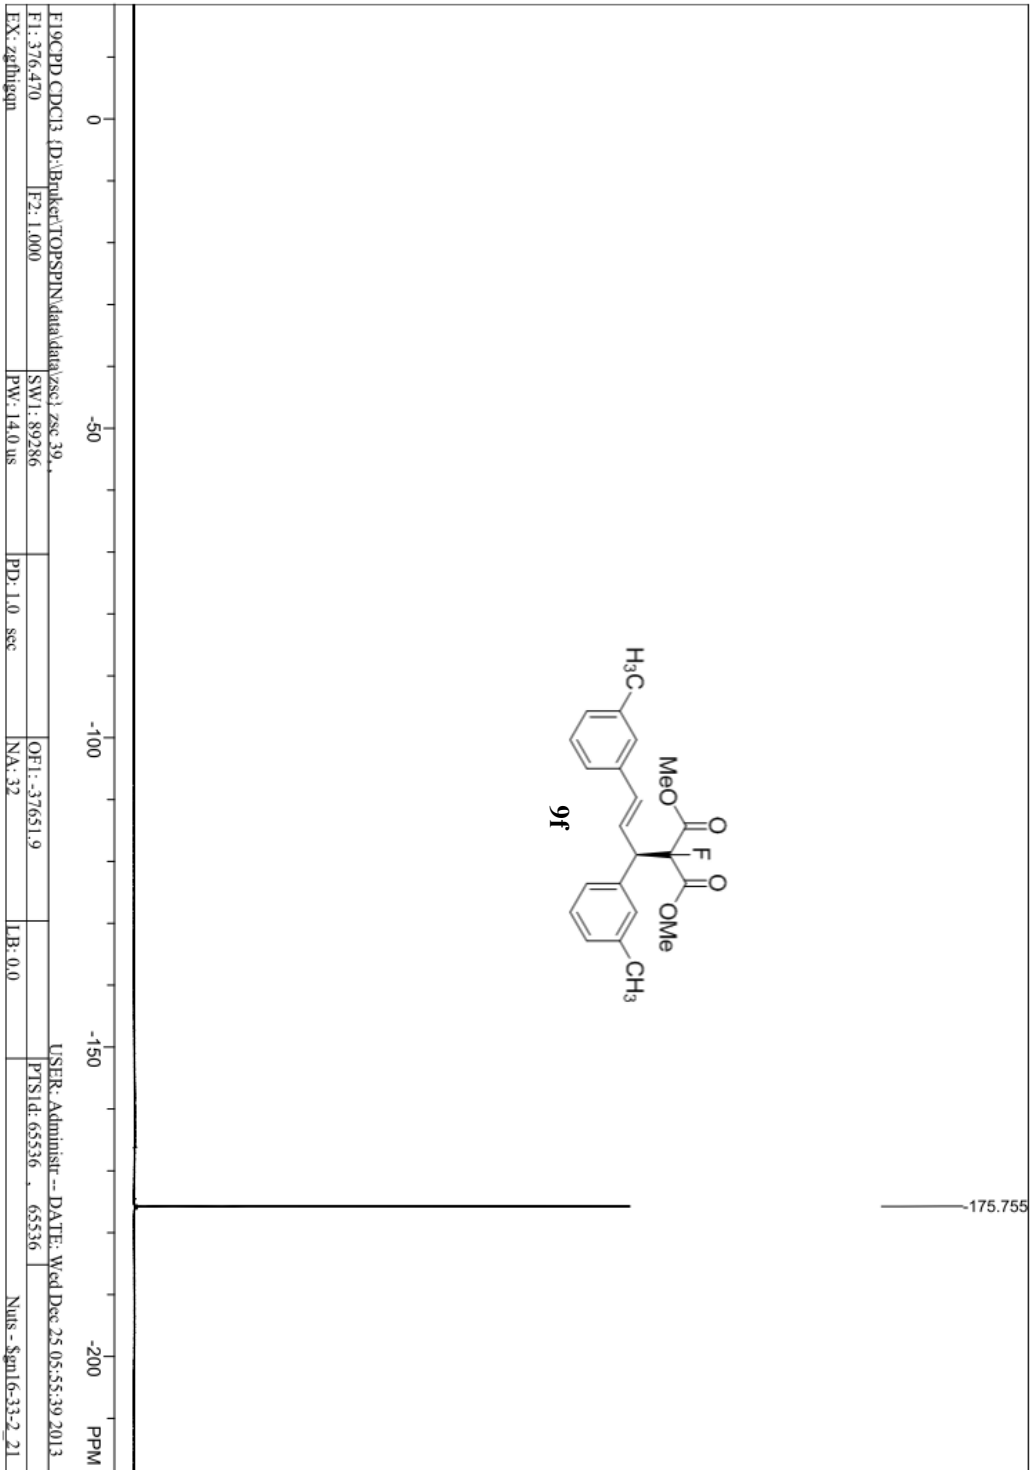



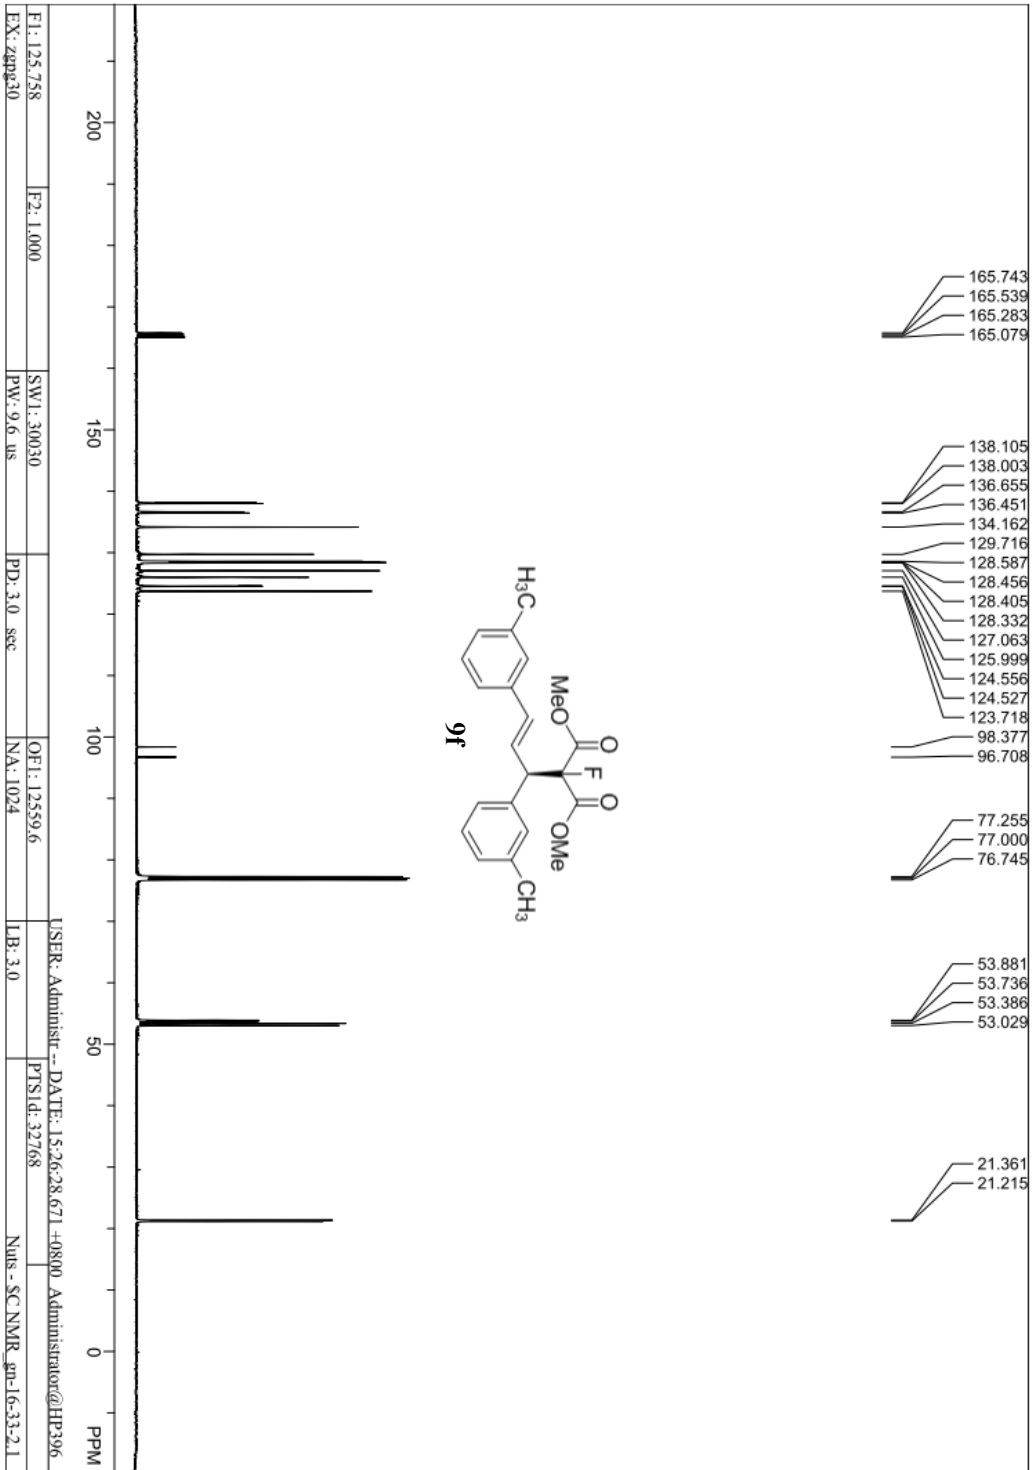

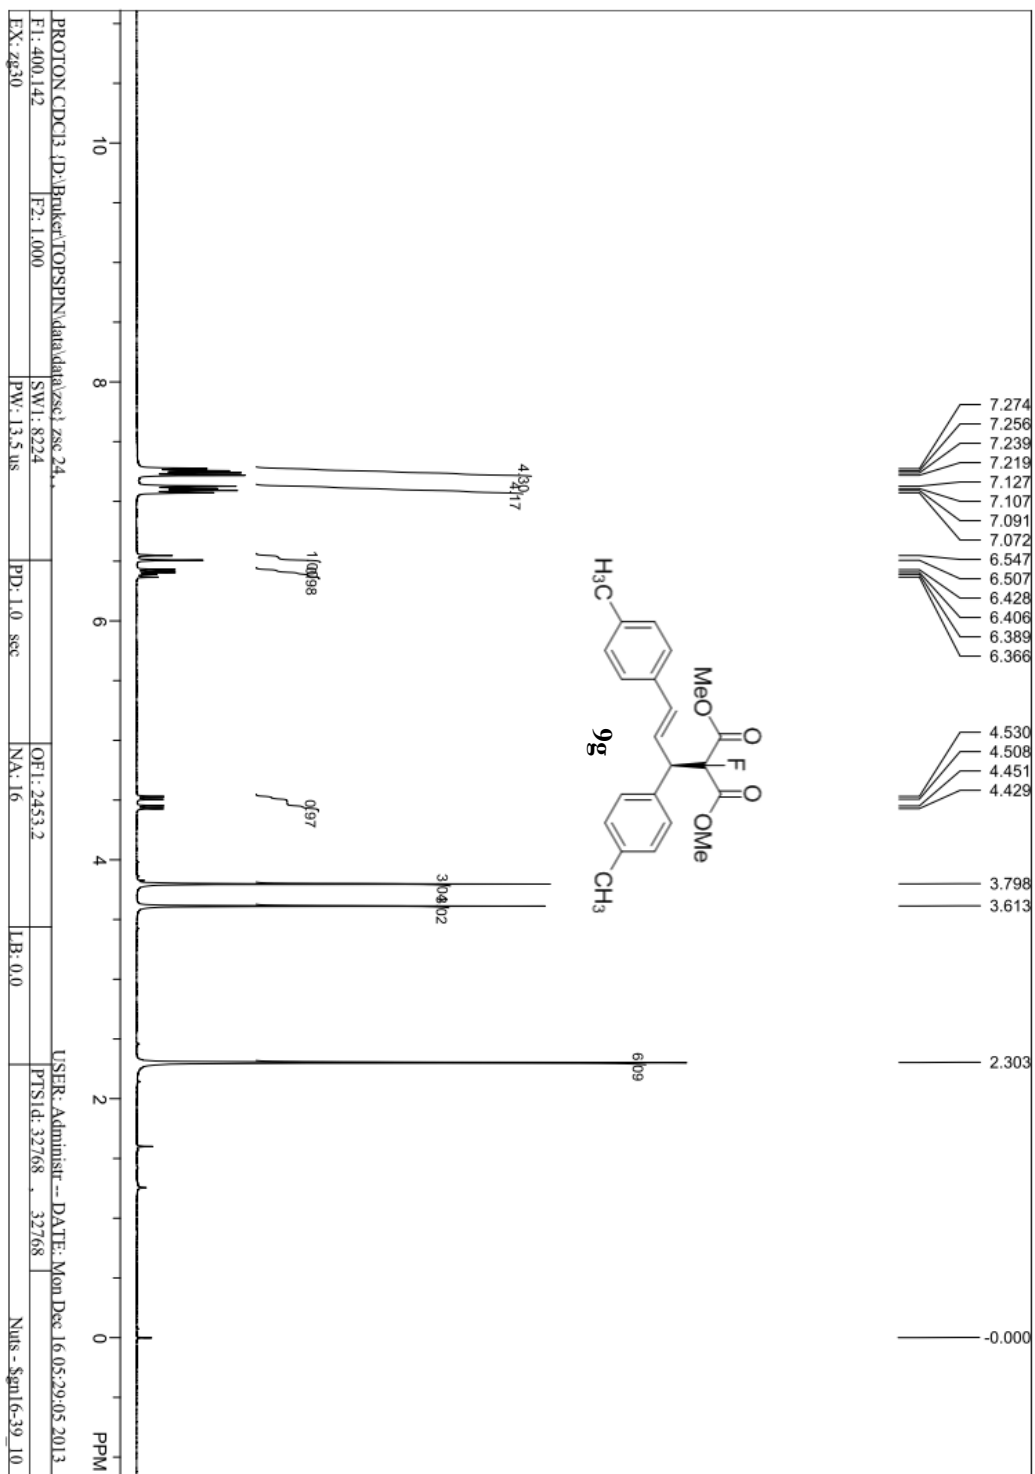

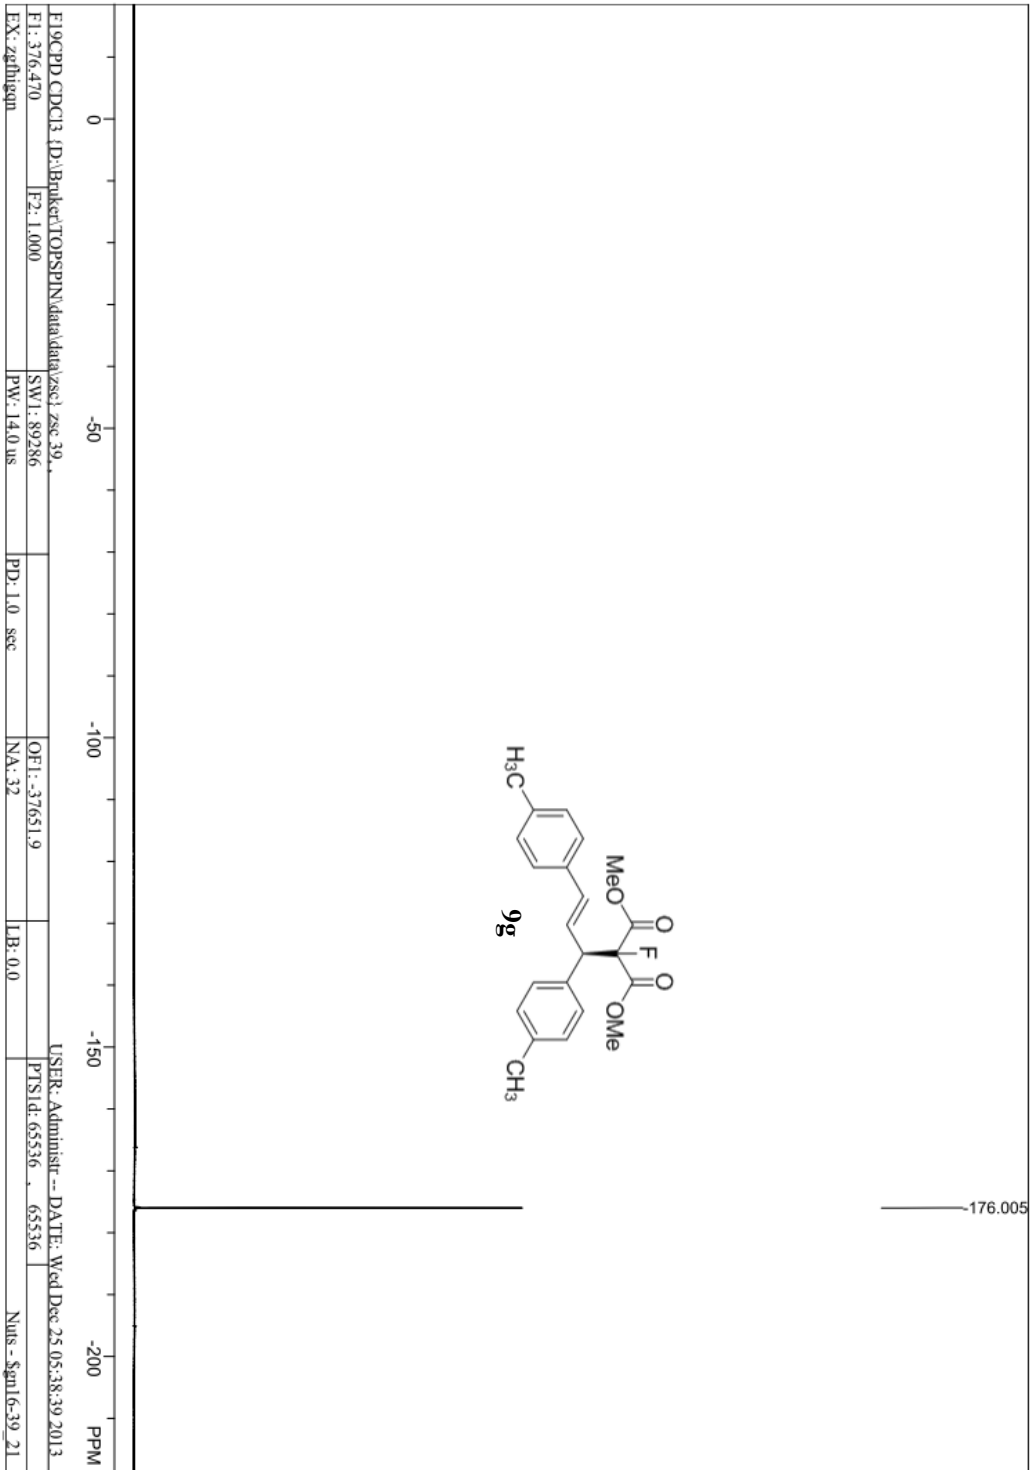

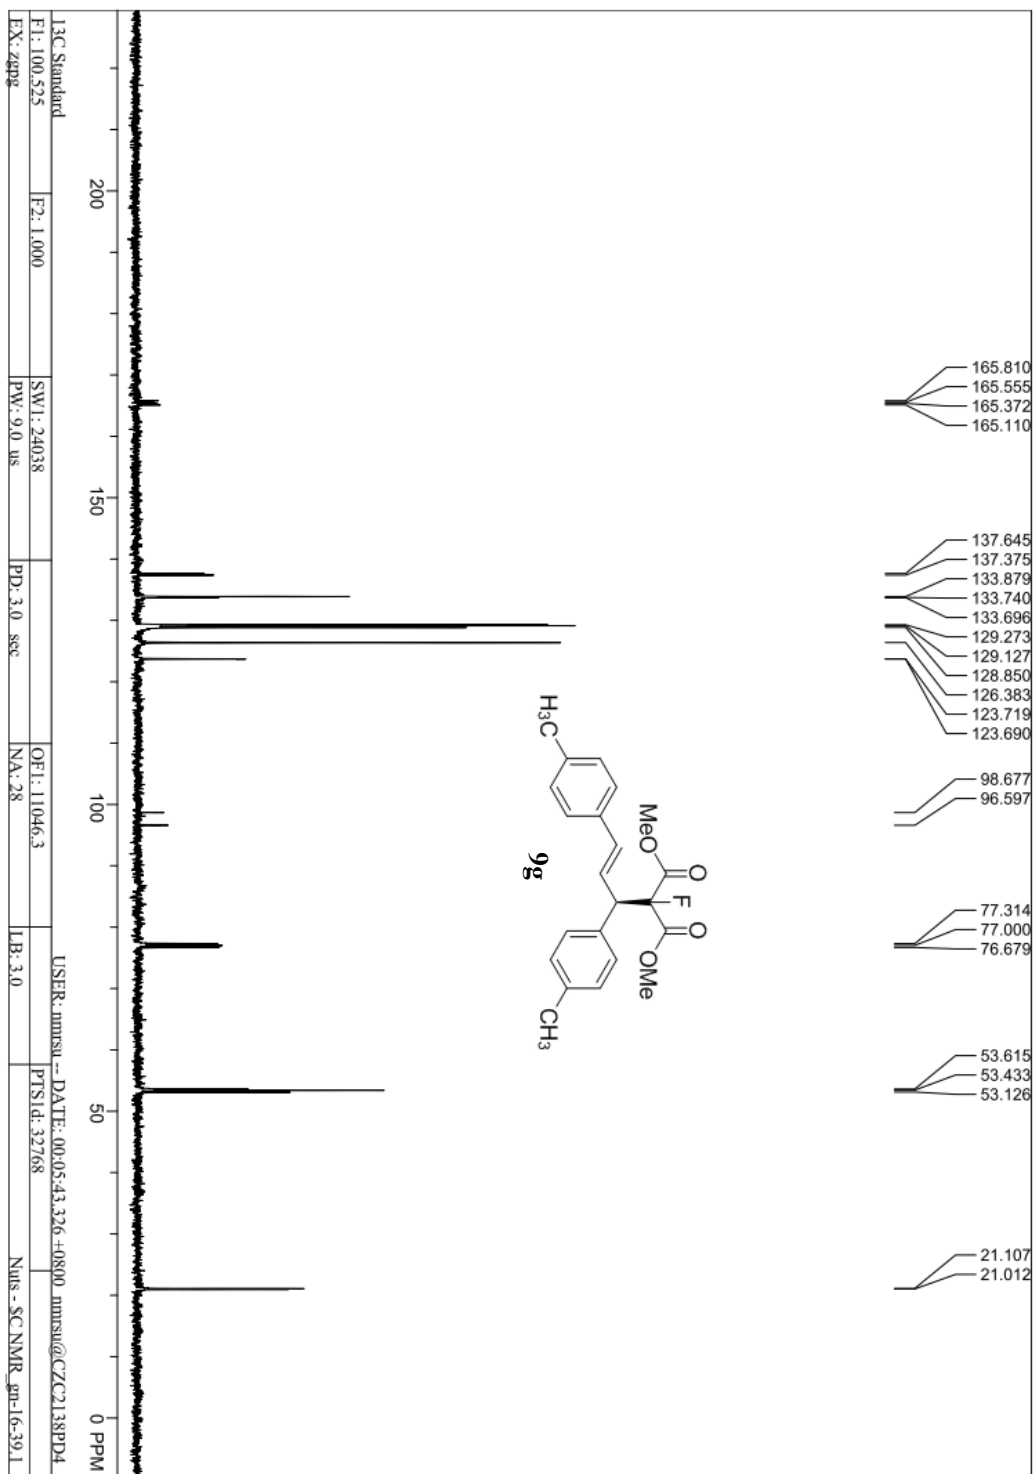

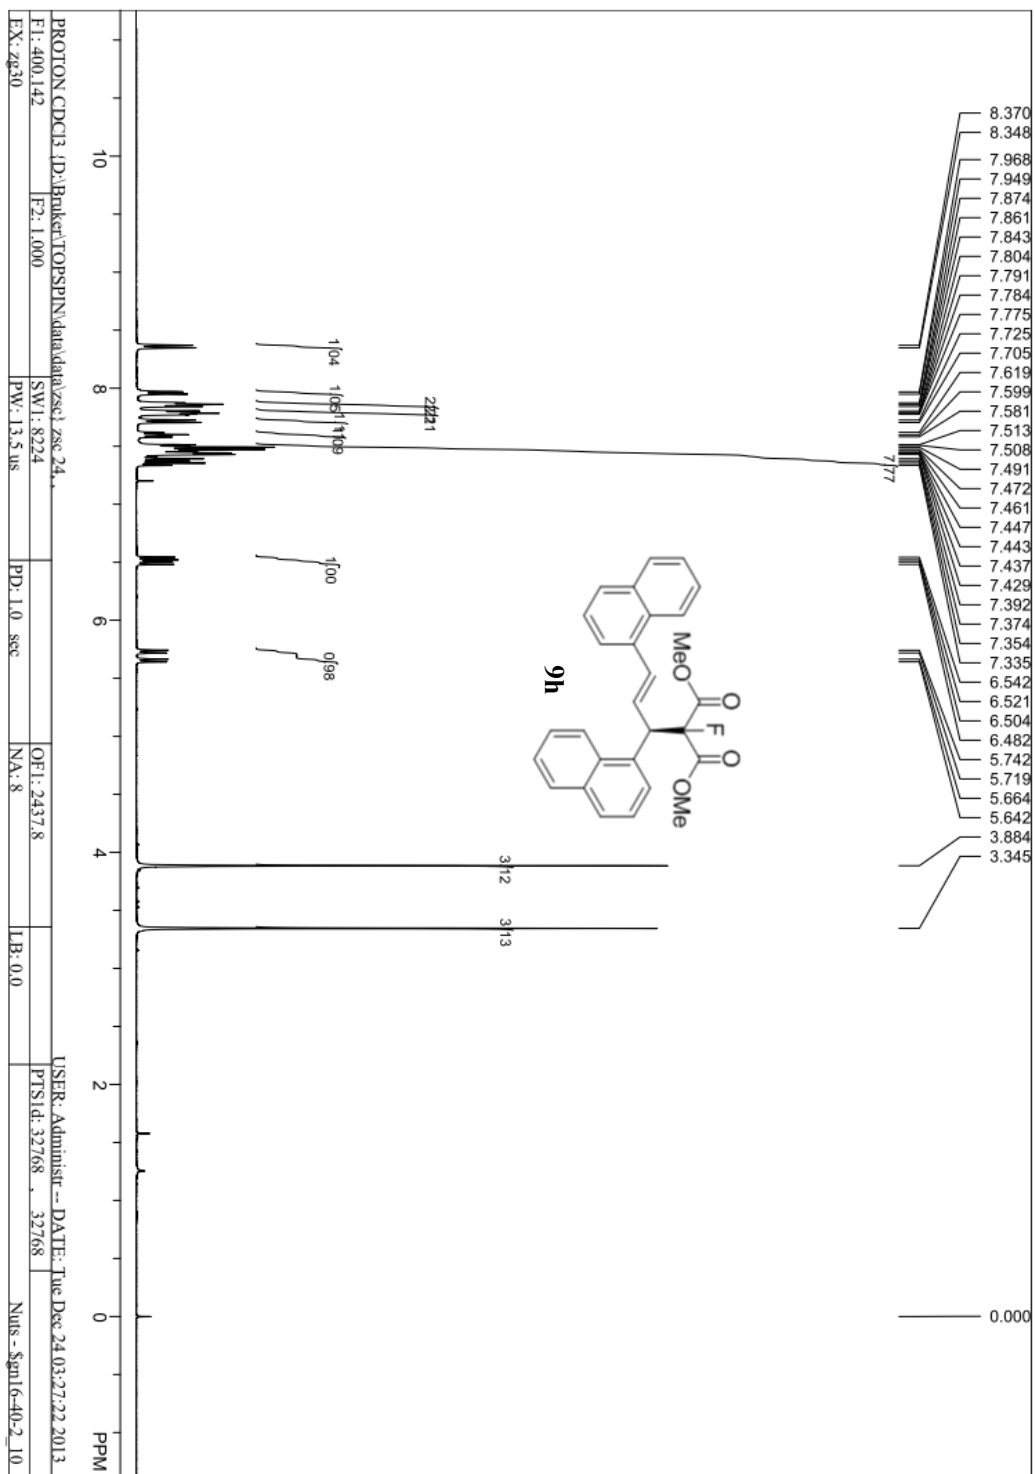

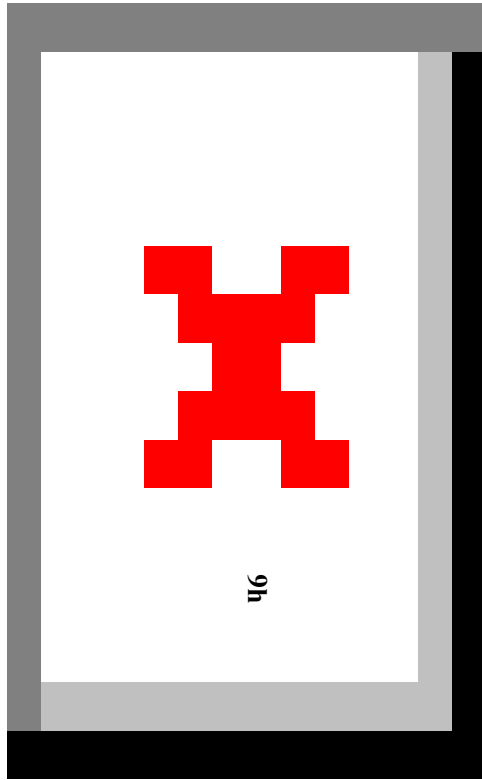

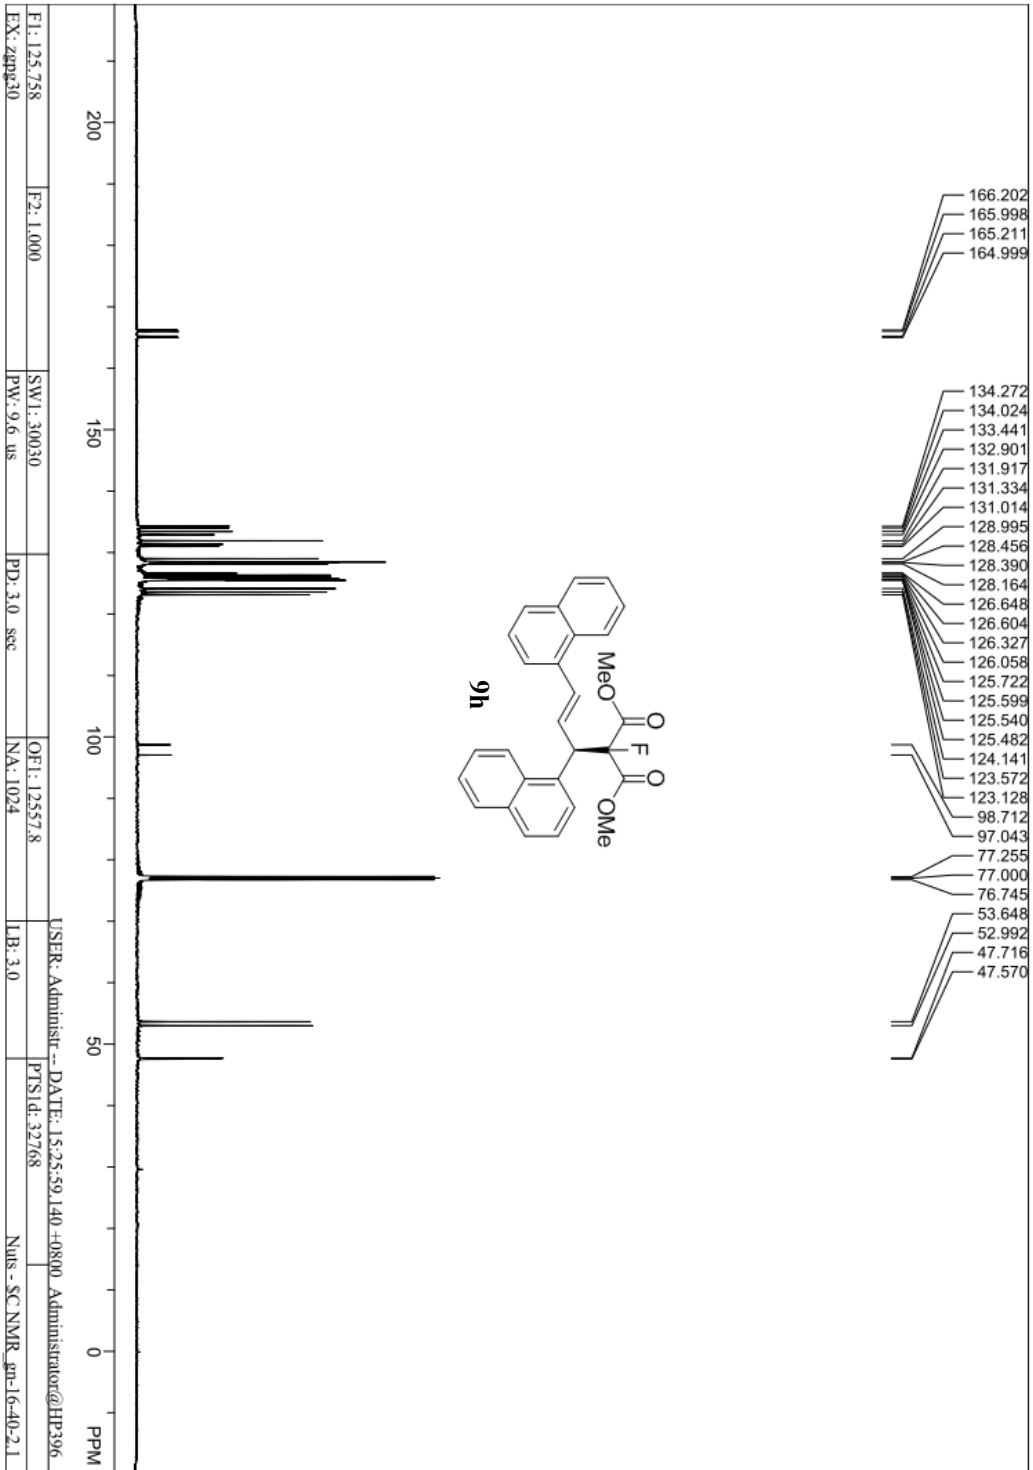

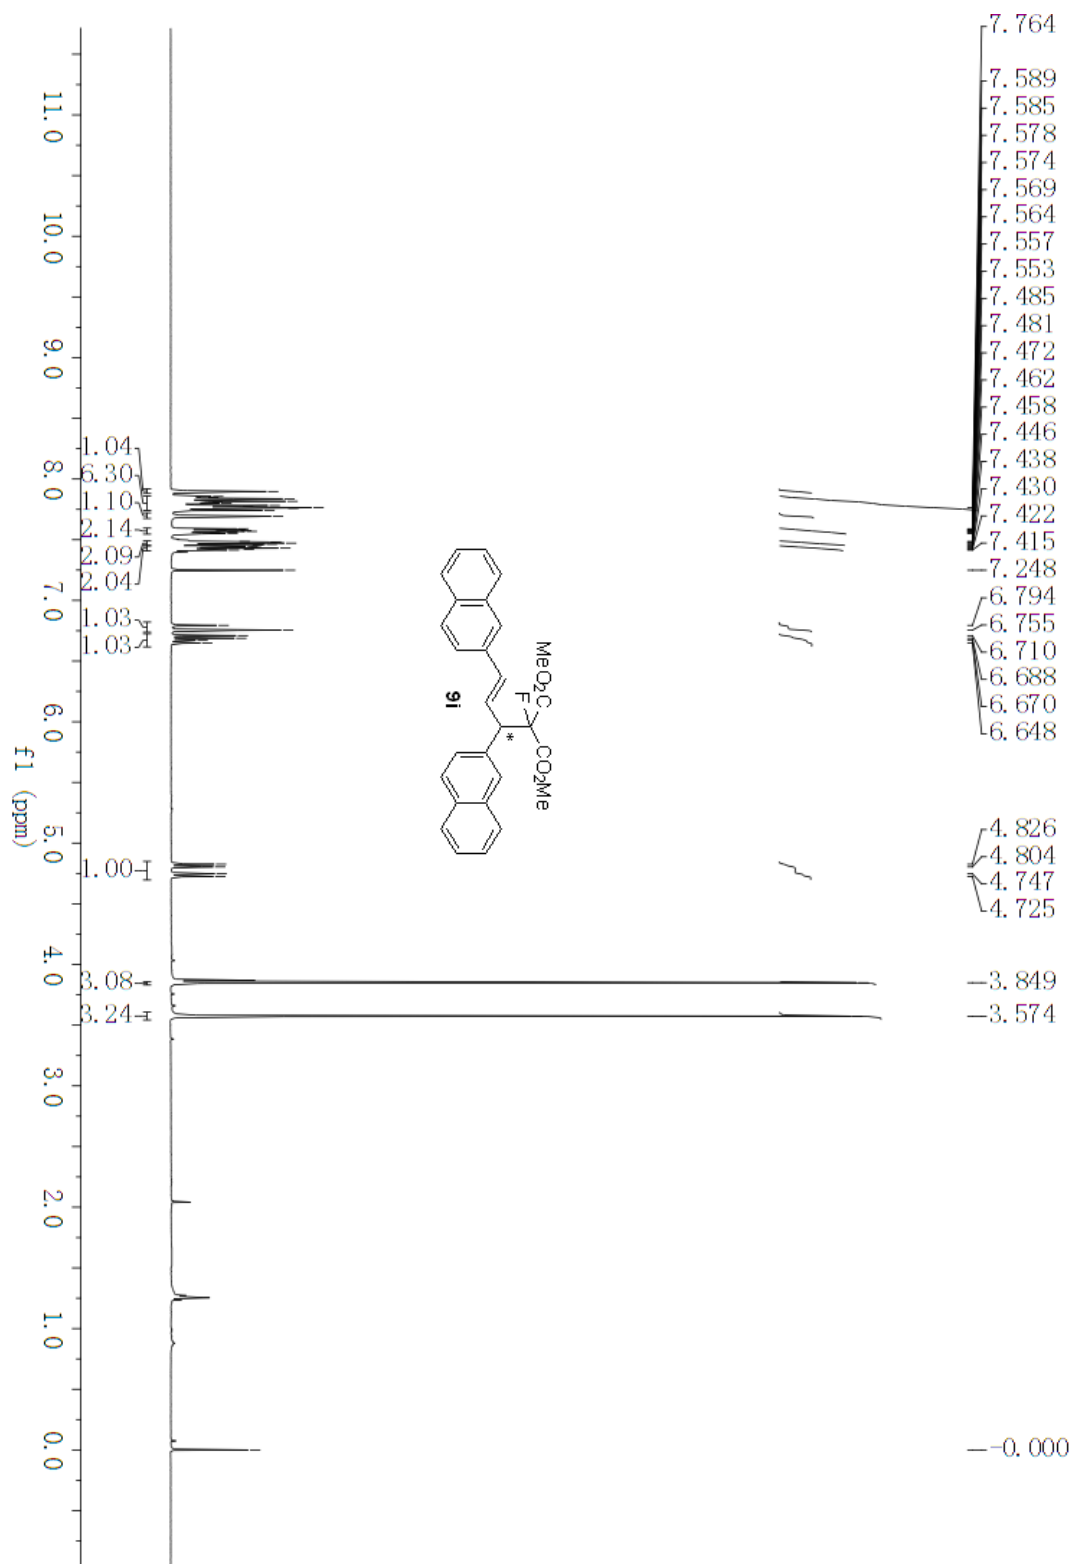



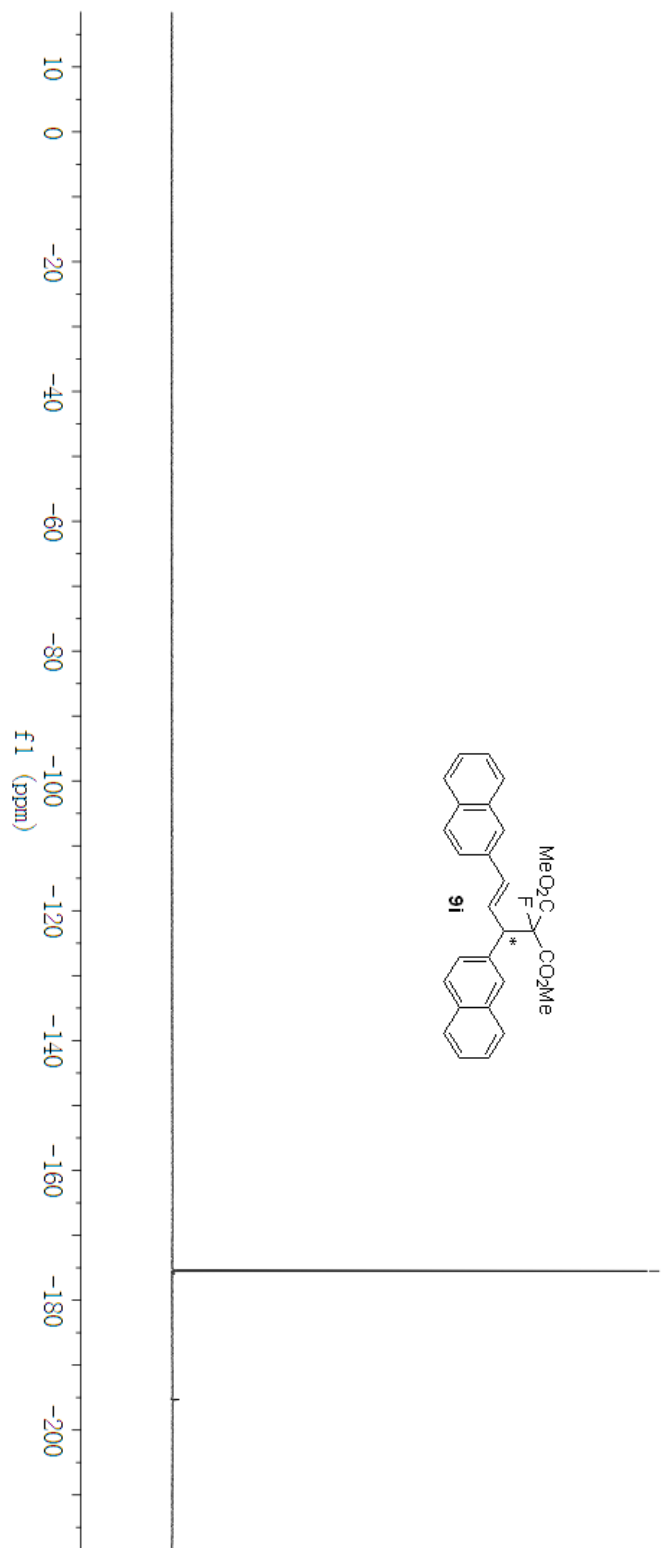

--175.500

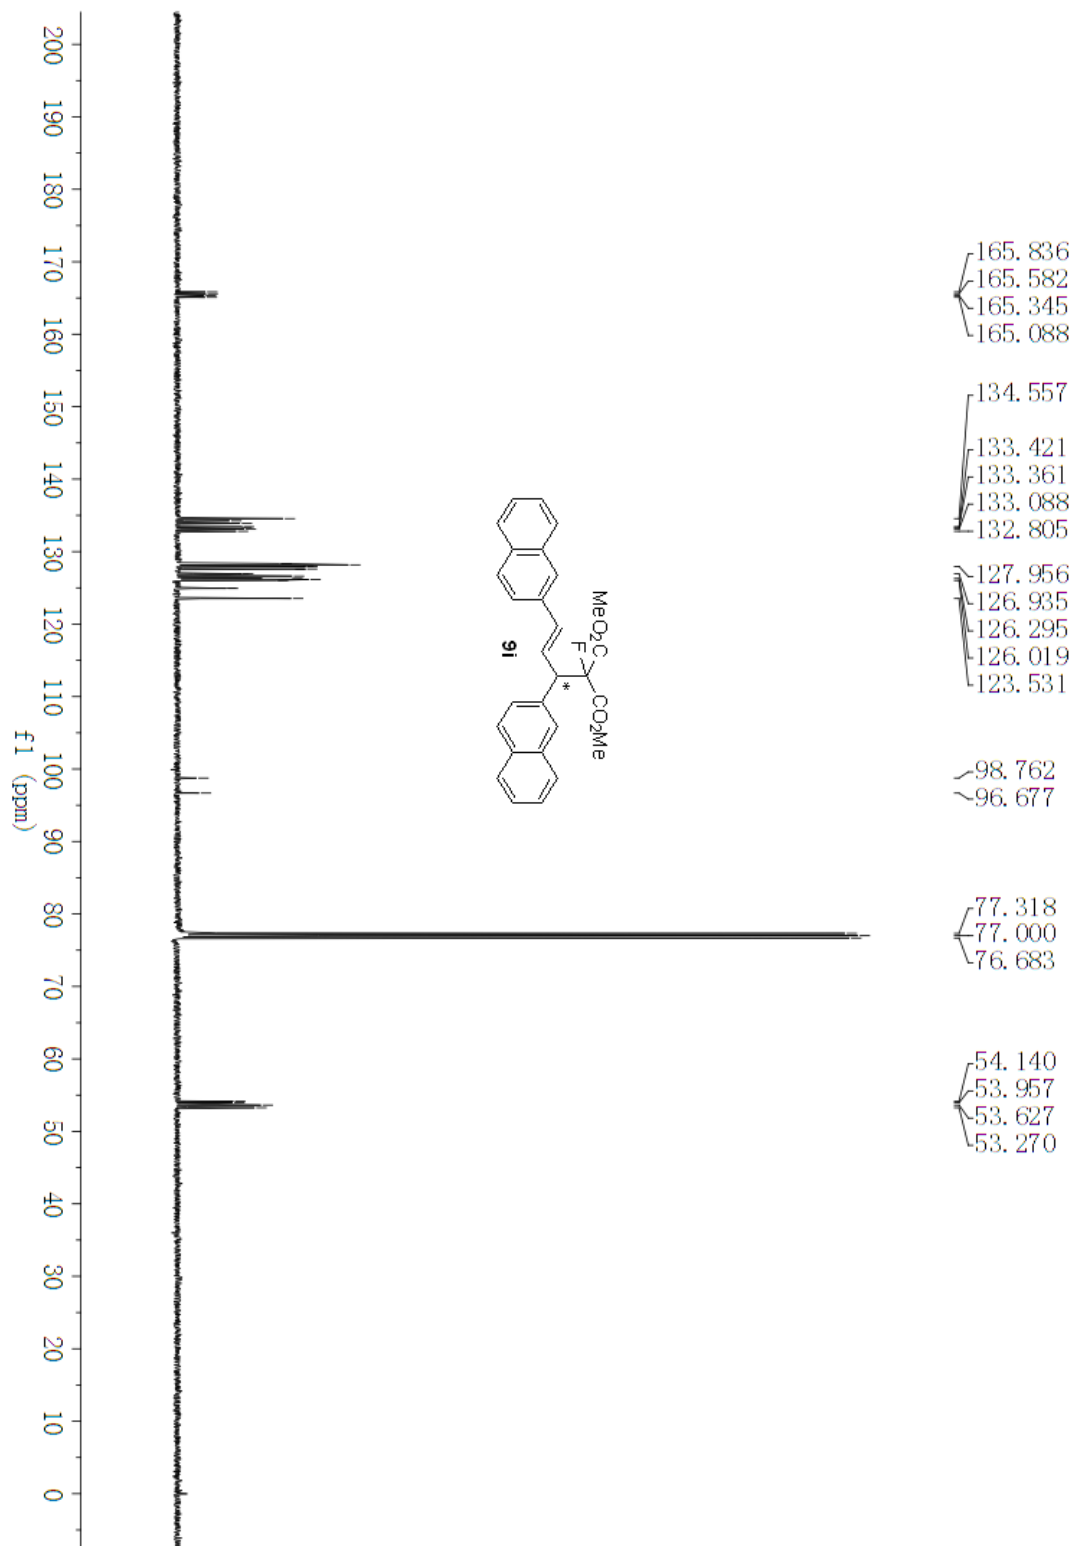

## HPLC Data of Chiral Compounds

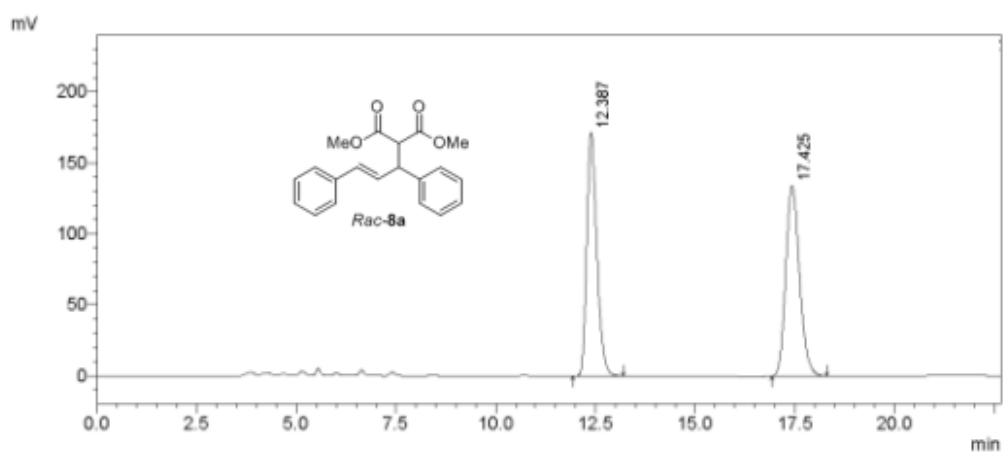

| Peak No. | R. Time | Peak Area | Peak Height | Percent (%) |
|----------|---------|-----------|-------------|-------------|
| 1        | 12.387  | 3013225   | 171687      | 48.393      |
| 2        | 17.425  | 3213341   | 134103      | 51.607      |

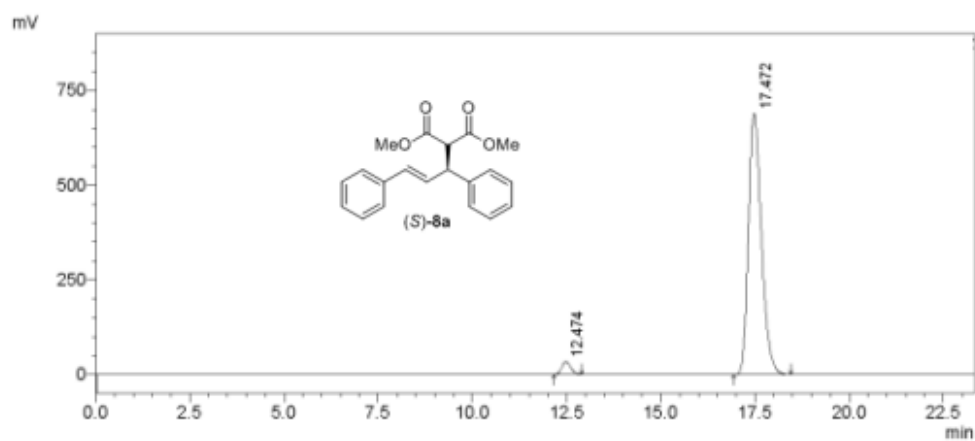

| Peak No. | R. Time | Peak Area | Peak Height | Percent (%) |
|----------|---------|-----------|-------------|-------------|
| 1        | 12.474  | 571641    | 33720       | 3.330       |
| 2        | 17.472  | 16594665  | 690079      | 96.670      |

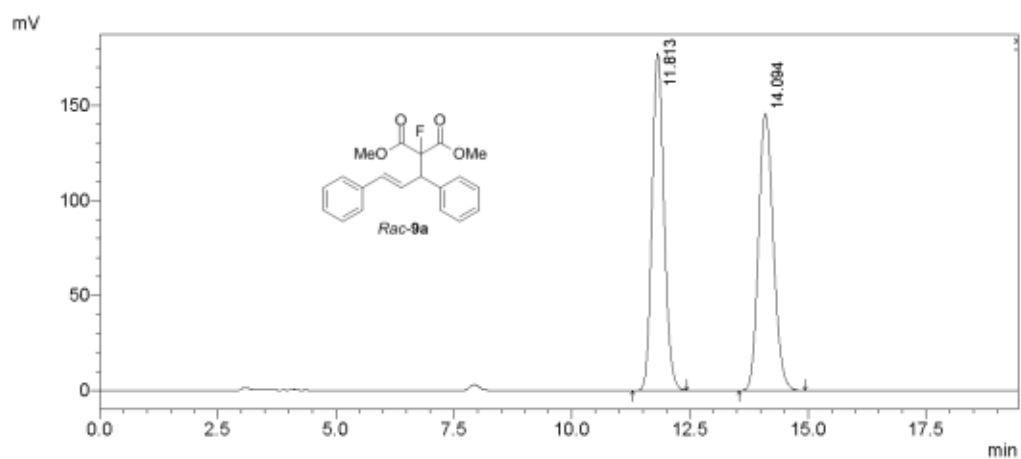

| Peak No. | R. Time | Peak Area | Peak Height | Percent (%) |
|----------|---------|-----------|-------------|-------------|
| 1        | 11.813  | 3137627   | 177191      | 50.079      |
| 2        | 14.094  | 3127705   | 145682      | 49.921      |

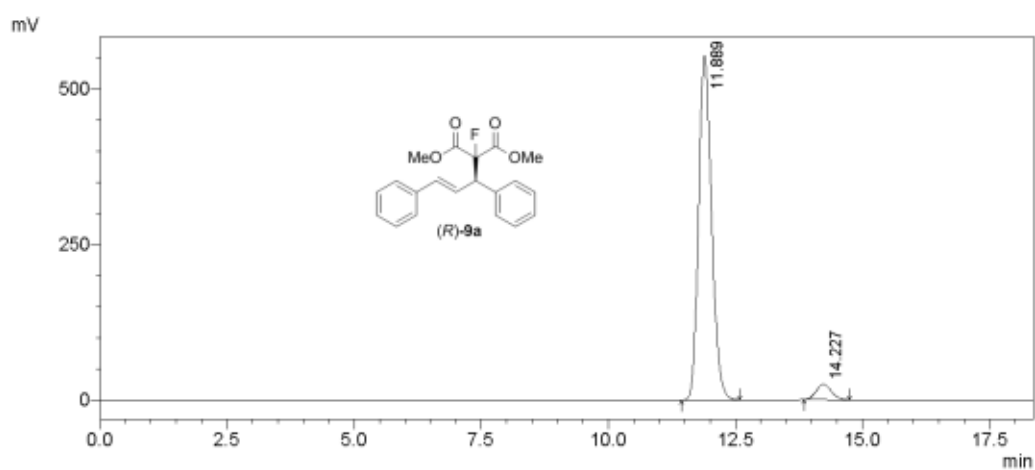

| Peak No. | R. Time | Peak Area | Peak Height | Percent (%) |
|----------|---------|-----------|-------------|-------------|
| 1        | 11.889  | 9857275   | 552669      | 95.064      |
| 2        | 14.227  | 511862    | 24669       | 4.936       |

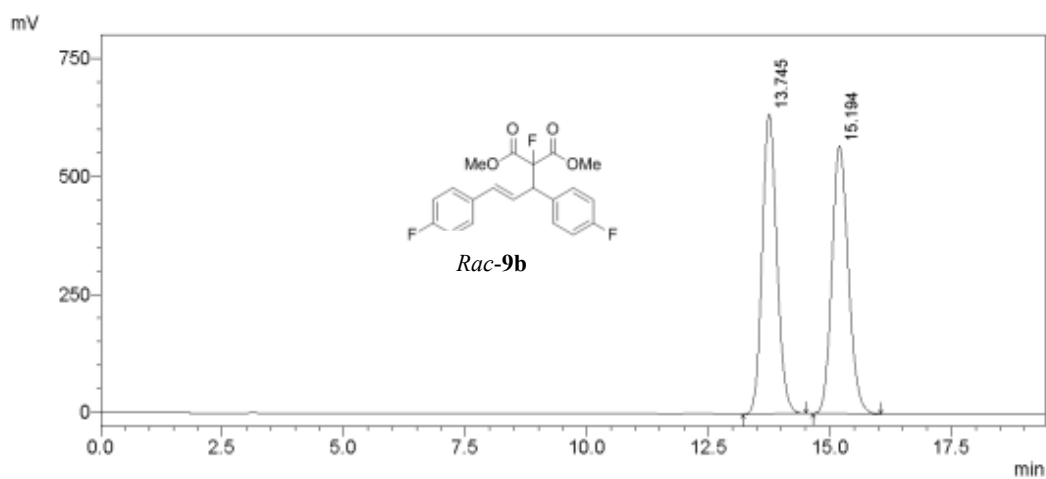

| Peak No. | R. Time | Peak Area | Peak Height | Percent (%) |
|----------|---------|-----------|-------------|-------------|
| 1        | 13.745  | 13332244  | 635460      | 50.018      |
| 2        | 15.194  | 13322495  | 566499      | 49.982      |

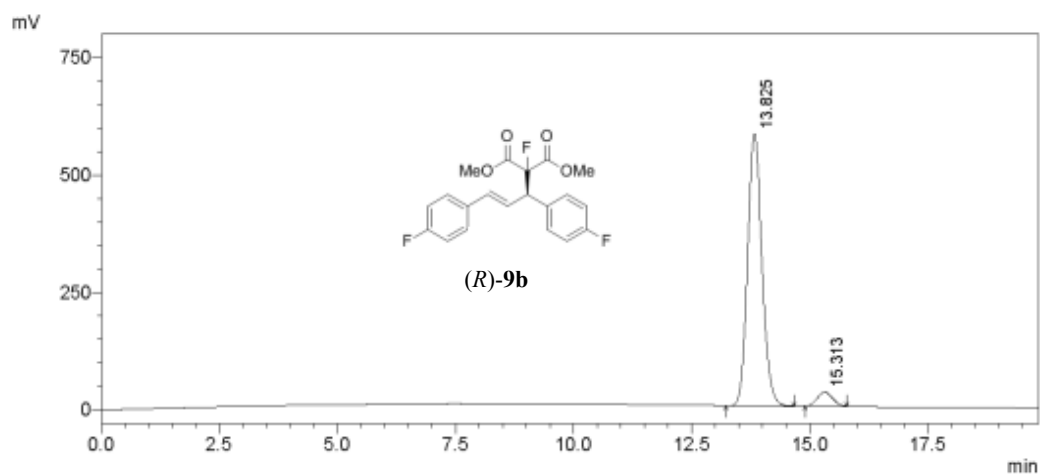

| Peak No. | R. Time | Peak Area | Peak Height | Percent (%) |
|----------|---------|-----------|-------------|-------------|
| 1        | 13.825  | 12276980  | 579140      | 94.813      |
| 2        | 15.313  | 671610    | 29832       | 5.187       |

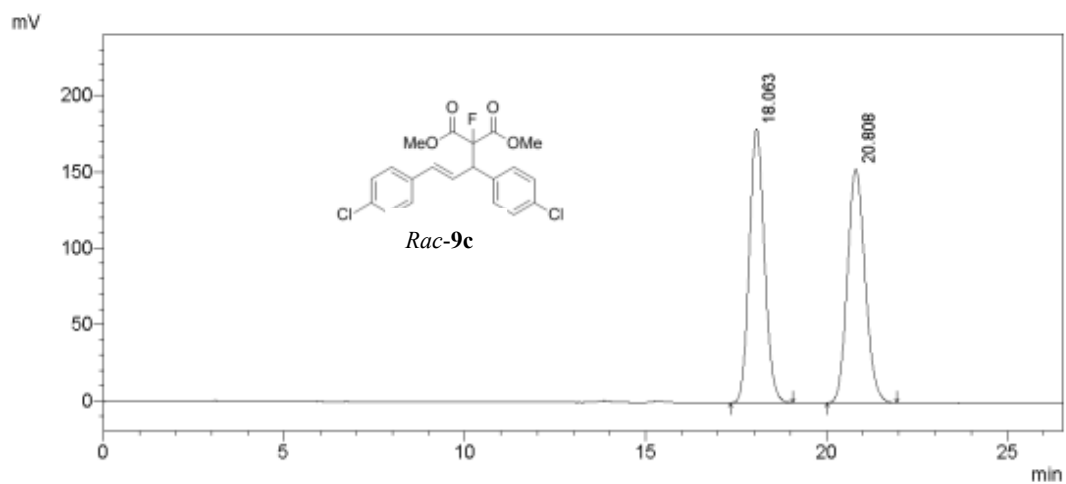

| Peak No. | R. Time | Peak Area | Peak Height | Percent (%) |
|----------|---------|-----------|-------------|-------------|
| 1        | 18.063  | 5212507   | 179359      | 50.014      |
| 2        | 20.808  | 5209597   | 153115      | 49.986      |

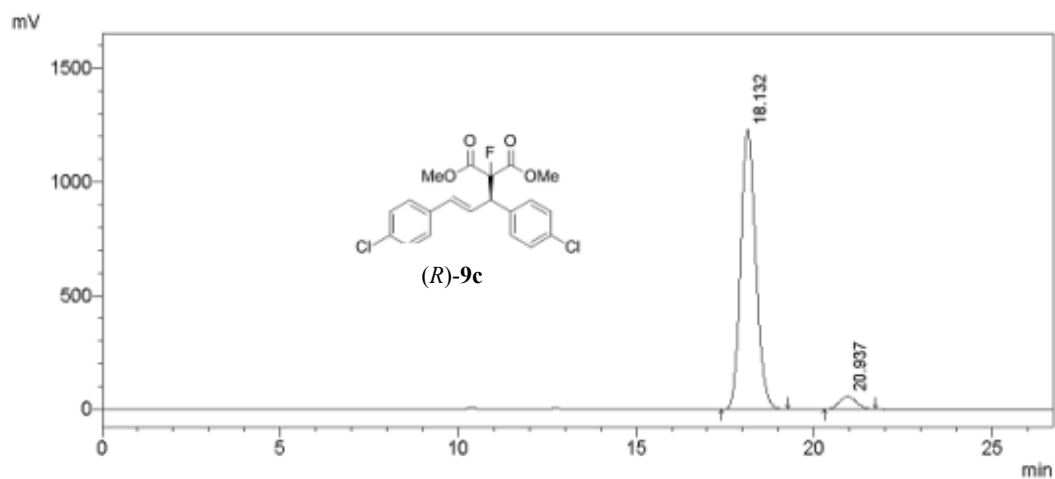

| Peak No. | R. Time | Peak Area | Peak Height | Percent (%) |
|----------|---------|-----------|-------------|-------------|
| 1        | 18.132  | 36365539  | 1230040     | 95.048      |
| 2        | 20.937  | 1894791   | 56511       | 4.952       |

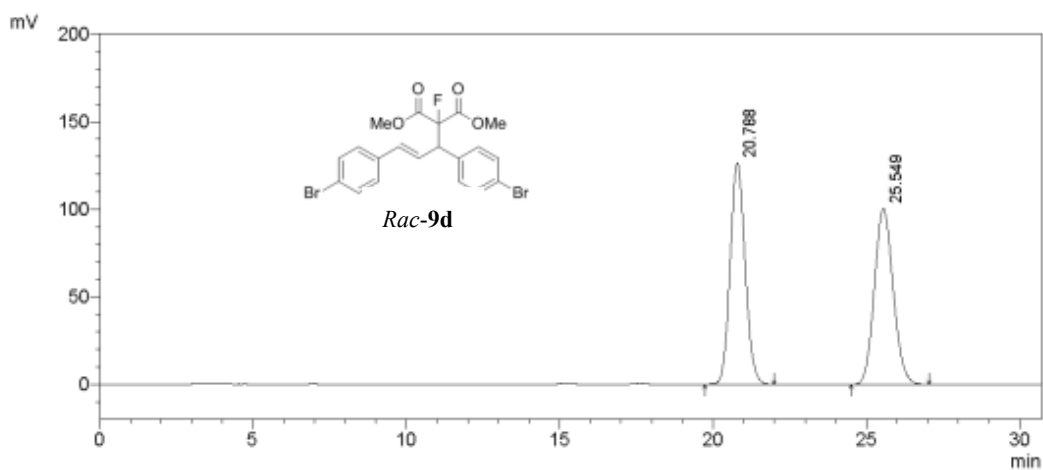

| Peak No. | R. Time | Peak Area | Peak Height | Percent (%) |
|----------|---------|-----------|-------------|-------------|
| 1        | 20.788  | 4308362   | 126601      | 49.991      |
| 2        | 25.549  | 4309905   | 100484      | 50.009      |

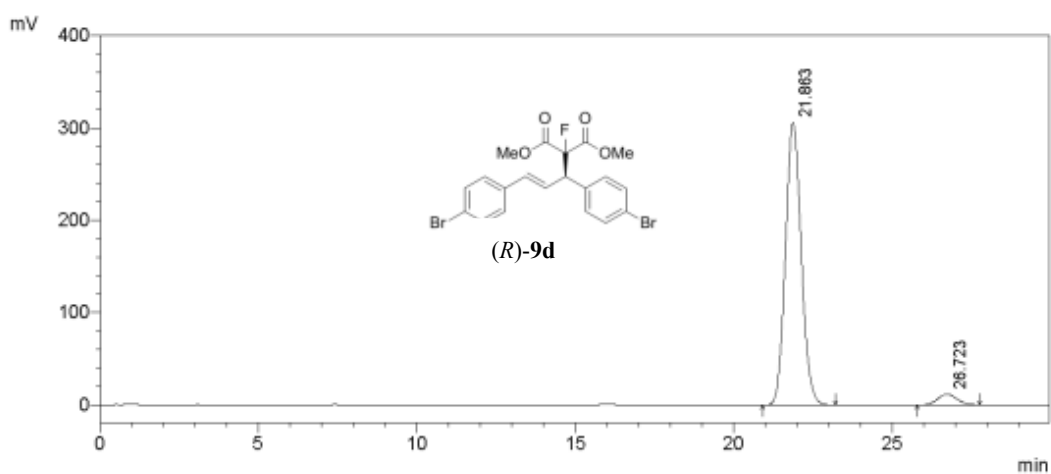

| Peak No. | R. Time | Peak Area | Peak Height | Percent (%) |
|----------|---------|-----------|-------------|-------------|
| 1        | 21.863  | 10626744  | 305993      | 95.561      |
| 2        | 26.723  | 493594    | 11634       | 4.439       |

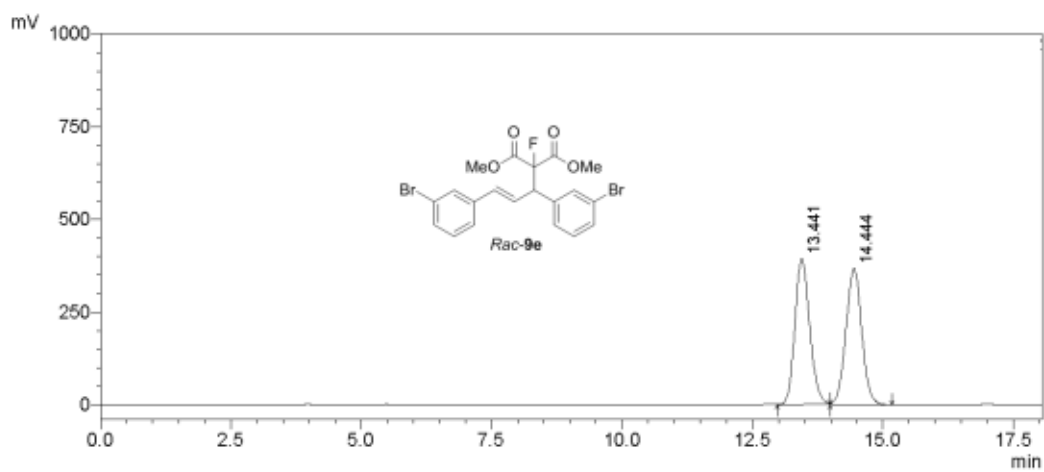

| Peak No. | R. Time | Peak Area | Peak Height | Percent (%) |
|----------|---------|-----------|-------------|-------------|
| 1        | 13.441  | 7768268   | 392619      | 49.928      |
| 2        | 14.444  | 7790613   | 367689      | 50.072      |

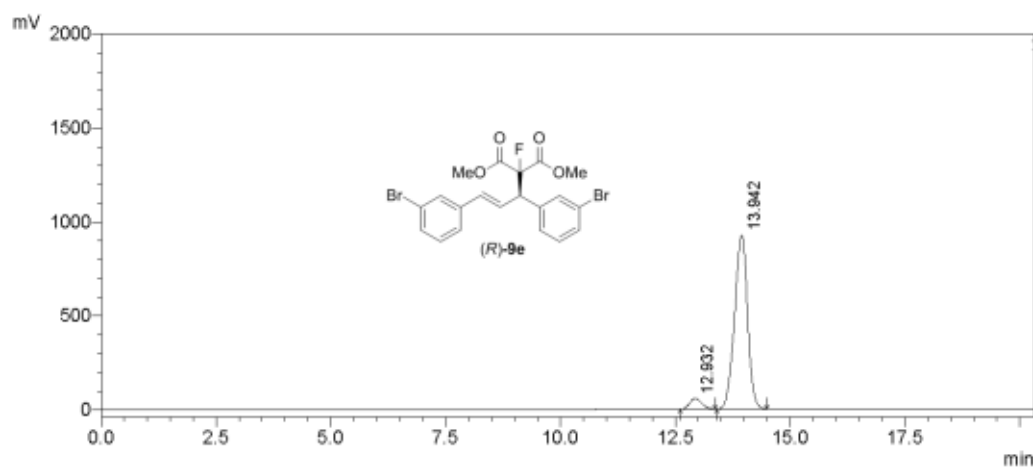

| Peak No. | R. Time | Peak Area | Peak Height | Percent (%) |
|----------|---------|-----------|-------------|-------------|
| 1        | 12.932  | 1004267   | 56682       | 5.229       |
| 2        | 13.842  | 18203105  | 926060      | 94.771      |



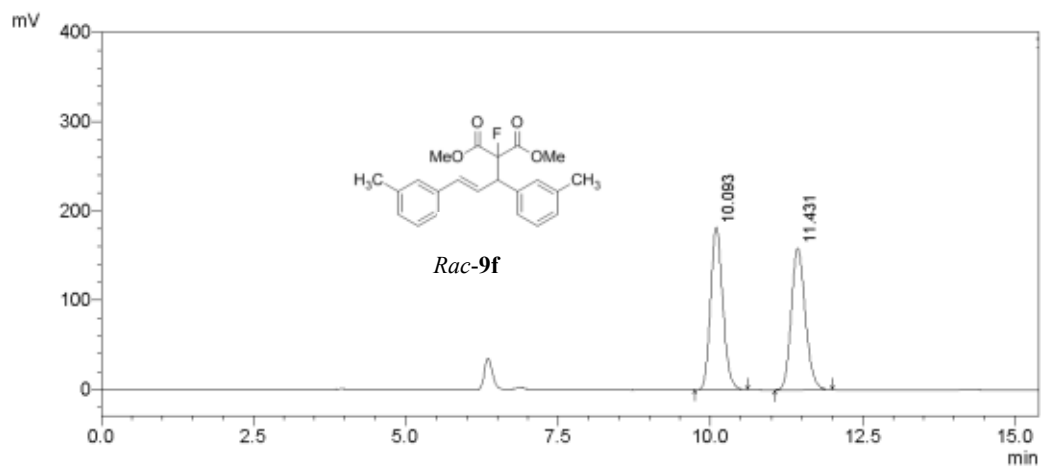

| Peak No. | R. Time | Peak Area | Peak Height | Percent (%) |
|----------|---------|-----------|-------------|-------------|
| 1        | 10.093  | 2542849   | 181945      | 49.873      |
| 2        | 11.431  | 2555844   | 158923      | 50.127      |

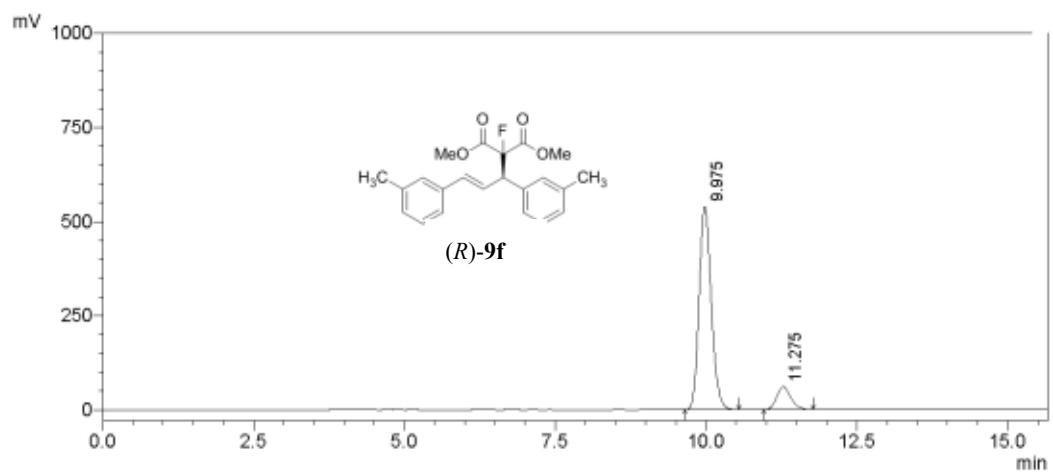

| Peak No. | R. Time | Peak Area | Peak Height | Percent (%) |
|----------|---------|-----------|-------------|-------------|
| 1        | 9.975   | 7516978   | 538786      | 88.514      |
| 2        | 11.275  | 975471    | 60245       | 11.486      |

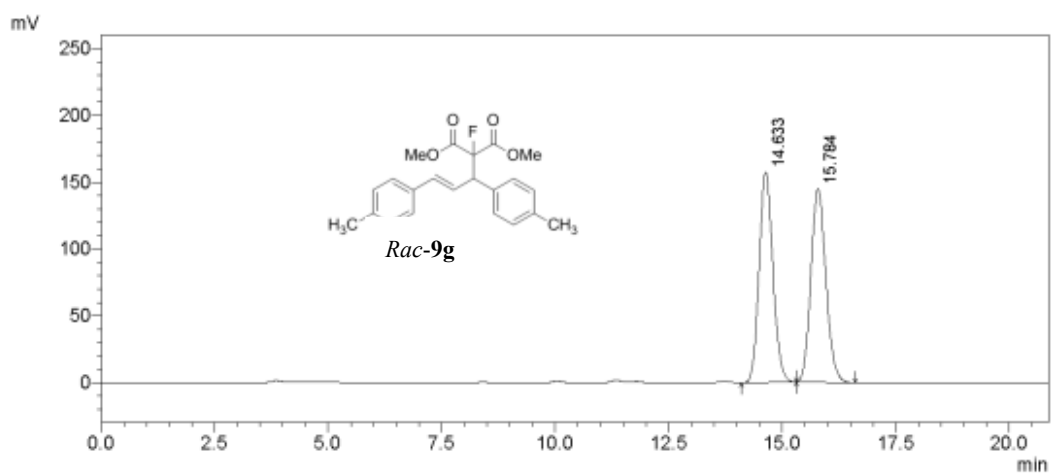

| Peak No. | R. Time | Peak Area | Peak Height | Percent (%) |
|----------|---------|-----------|-------------|-------------|
| 1        | 14.633  | 3324910   | 157558      | 49.953      |
| 2        | 15.784  | 3331179   | 144708      | 50.047      |

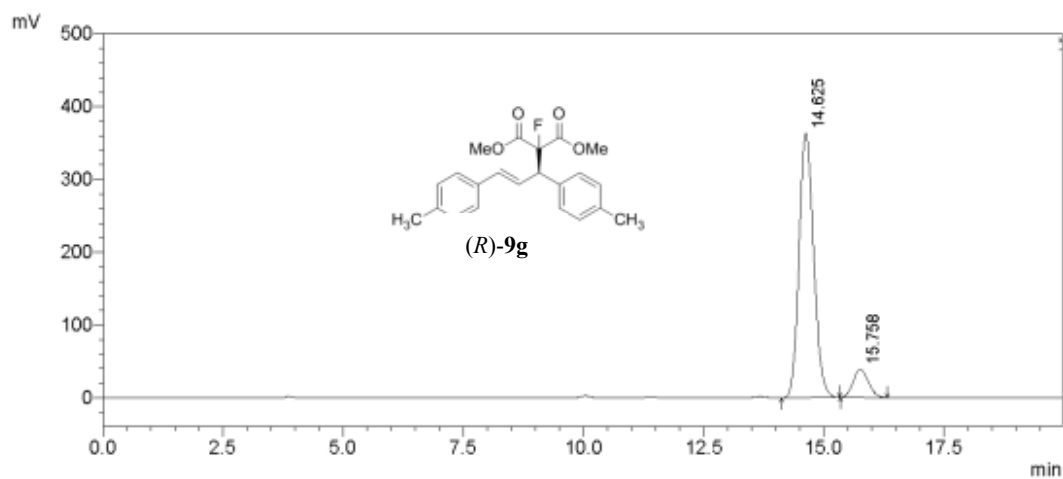

| Peak No. | R. Time | Peak Area | Peak Height | Percent (%) |
|----------|---------|-----------|-------------|-------------|
| 1        | 14.625  | 7647525   | 363658      | 89.858      |
| 2        | 15.758  | 863167    | 38777       | 10.142      |

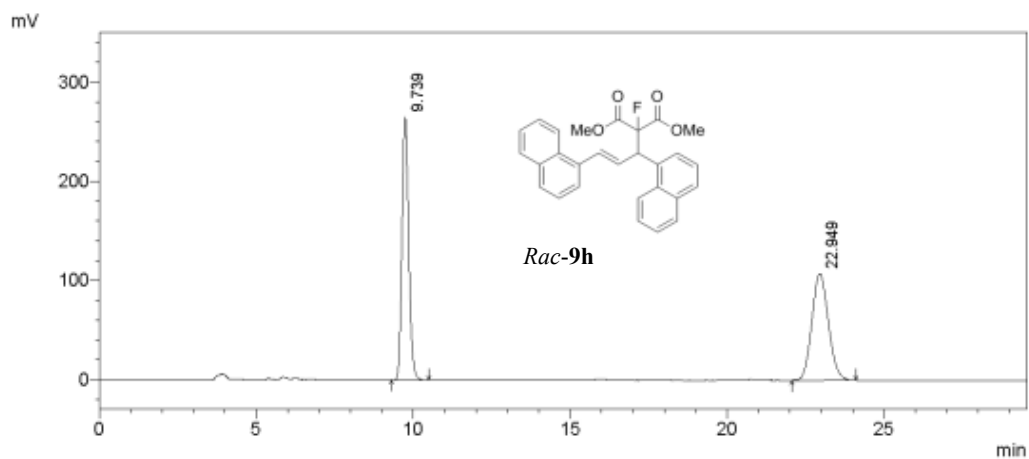

| Peak No. | R. Time | Peak Area | Peak Height | Percent (%) |
|----------|---------|-----------|-------------|-------------|
| 1        | 9.739   | 3912678   | 265539      | 49.926      |
| 2        | 22.949  | 3924341   | 107543      | 50.074      |

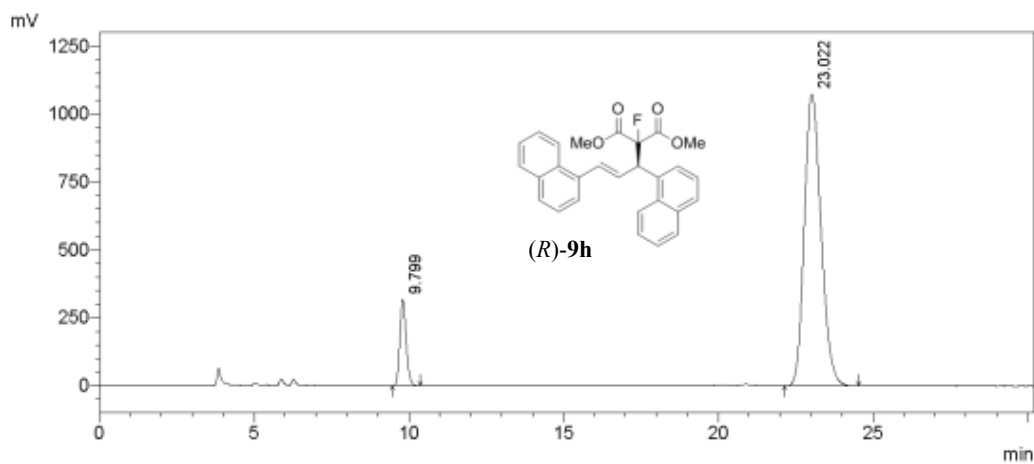

| Peak No. | R. Time | Peak Area | Peak Height | Percent (%) |
|----------|---------|-----------|-------------|-------------|
| 1        | 9.799   | 4559851   | 317551      | 10.154      |
| 2        | 23.022  | 40348842  | 1074226     | 89.846      |

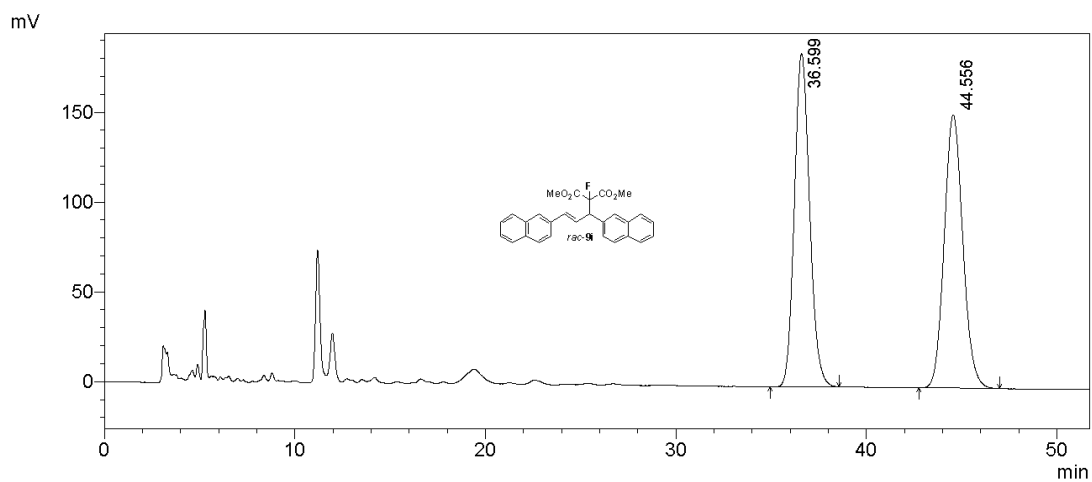

| Peak No. | R. time | Peak Area | Peak Height | Percent (%) |
|----------|---------|-----------|-------------|-------------|
| 1        | 36.599  | 10342461  | 185380      | 49.990      |
| 2        | 44.556  | 10346582  | 152198      | 50.010      |

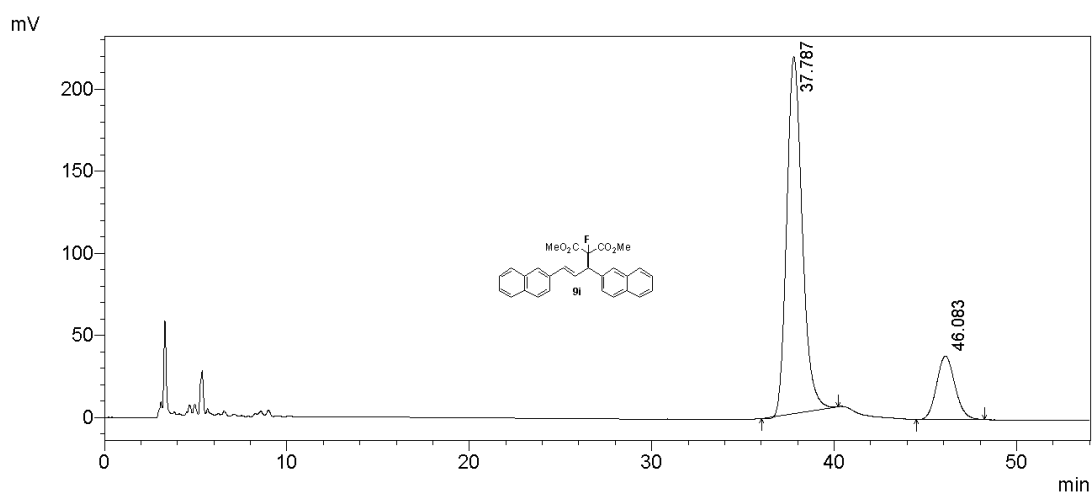

| Peak No. | R. time | Peak Area | Peak Height | Percent (%) |
|----------|---------|-----------|-------------|-------------|
| 1        | 37.787  | 12799766  | 217340      | 82.444      |
| 2        | 46.083  | 2725547   | 28914       | 17.556      |

## X-ray single crystal data for 4ia and 9e

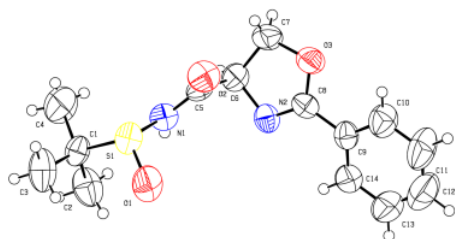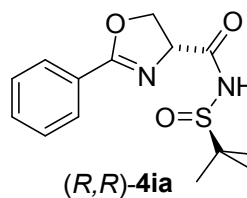

|                      |                                                                 |
|----------------------|-----------------------------------------------------------------|
| Chemical formula     | C <sub>14</sub> H <sub>18</sub> N <sub>2</sub> O <sub>3</sub> S |
| Formula weight       | 294.36                                                          |
| Space group          | P2 <sub>1</sub>                                                 |
| Z                    | 2                                                               |
| a, Å                 | 6.306(4)                                                        |
| b, Å                 | 8.935(6)                                                        |
| c, Å                 | 13.518(9)                                                       |
| α, °                 | 90.00                                                           |
| β, °                 | 96.662(8)                                                       |
| γ, °                 | 90.00                                                           |
| V, Å <sup>3</sup>    | 756.5(8)                                                        |
| T, K                 | 293(2)                                                          |
| ρ, g/cm <sup>3</sup> | 1.292                                                           |

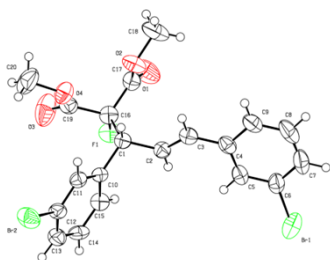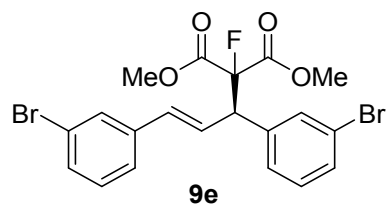

Chemical formula

$C_{20}H_{17}Br_2FO_4$

Formula weight

500.15

Space group

$P2_1$

Z

2

$a, \text{\AA}$

11.651(4)

$b, \text{\AA}$

5.9117(18)

$c, \text{\AA}$

14.797(5)

$\alpha, ^\circ$

90.00

$\beta, ^\circ$

96.518(4)

$\gamma, ^\circ$

90.00

$V, \text{\AA}^3$

1012.6(4)

T, K

293(2)

$\rho, \text{g/cm}^3$

1.640
